# Supplementary material for: Caffeoylquinic acids and their microbiota-derived metabolites ameliorate hepatic lipid metabolism disorders and egg yolk lipid composition via the gut-liver axis
Source: Research Square preprint supplement (doi:10.21203/rs.3.rs-7836529/v1), 2025-12-22
Supplement: Supplementary file 1 [file 350ac224e3c07bace12d8793.xlsx]

## Sheet: Table S1
Supplementary Table 1 Composition and nutrient contents of experimental diets
Ingredient, %	Content	Calculated nutrition levelsc, %	Content
Corn (8.5% CP)	62.2	Crude protein	15.63
Soybean meal (46% CP)	23.2	Metabolizable energy, kcal/kg	2635
Wheat bran	3.796	Calcium	3.84
Limestone	9	Total phosphorus	0.48
CaHPO4	0.85	Available phosphorus+phytase	0.32
Zeolite powder	0.169	Lysine	0.79
Salt	0.3	Methionine	0.39
Choline chloride (50%)	0.1	Threonine	0.59
DL-Methionine (99%)	0.14	Tryptophan	0.18
Phytase (10,000U/g)	0.02	Methionine + cystine	0.66
Mineral premixa	0.025
Vitamin premixb	0.2
Total	100
aThe mineral premix provided the following per kg of diets: Mn 54 g, Fe 36 g, Cu 5 g, I 0.8 g, Zn 45 g, Se 0.18 g
bThe vitamin premix provided the following per kg of diets: vitamin A 38,000,000 IU, vitamin D3 15,000,000 IU, vitamin E 60 g, vitamin K3 7 g, vitamin B1 6 g, vitamin B2 30 g, vitamin B6 15 g, vitamin B12 0.05 g, pantothenic acid 40 g, niacin 80 g, folic acid 1.5 g, biotin 0.2 g
cNutrient levels were calculated values, which based on the formula data of the basal diet

## Sheet: Table S2
Supplementary Table 2. Primer sequences for RT-qPCR
Gene	Primer	Primer Sequence (5'→3')	Accession No.
β-Actin	Forward	TGCGTGACATCAAGGAGAAG	NM_205518
	Reverse	TGCCAGGGTACATTGTGGTA
AMPK	Forward	ATCTGTCTCGCCCTCATCCT	NM_001039603.2
	Reverse	CCACTTCGCTCTTCTTACACCTT
ADIPOQ	Forward	TACAACGAGCAGAACCACTACGAC	NM_206991.2
	Reverse	CATAGGTGAAGATCACTGCCTTGTC
AdipoR1	Forward	GAGGAGGAAGTTGTCCGTGTGC	NM_001031027.2
	Reverse	TCGGAAGGACGGCATTGGAG
AdipoR2	Forward	GTTCTCCAGAGCCAGGTCTAC	NM_001007854.2
	Reverse	CTTCTTGAGGTGACTCATCATTG
ACACA	Forward	CCGAGAACCCAAAACTACCAG	NM_205505.1
	Reverse	GCCAGCAGTCTGAGCCACTA
FASN	Forward	AAAGCAATTCGTCACGGACA	NM_205155.4
	Reverse	GGCACCATCAGGACTAAGCA
PPARA	Forward	AGGCCAAGTTGAAAGCAGAA	NM_001001464.1
	Reverse	TTTCCCTGCAAGGATGACTC
CD36	Forward	CTGGGAAGGTTACTGCGATT	NM_001030731.1
	Reverse	GCGAGGAACTGTGAAACGATA
SREBP1c	Forward	GCCCTCTGTGCCTTTGTCTTC	NM_204126.2
	Reverse	ACTCAGCCATGATGCTTCTTC
SCD1	Forward	AGCAGAACGAGGCATGGTAG	NM_204890.2
	Reverse	GGATCAGCGTCAGCCCAATA
CPT1A	Forward	TCGTCTTGCCATGACTGGTG	XM_040700878.2
	Reverse	GCTGTGGTGTCTGACTCGTT
HMGCR	Forward	CATAGGTGGCTACAACG	NM_204485.3
	Reverse	TACGCTCCATCAAAGTG
ChREBP1	Forward	GATGAGCACCGCAAACCAGAGG	NM_001398177.1
	Reverse	TCGGAGCCGCTTCTTGTAGTAGG
APOBR	Forward	GGTTACTCCCACGATGGCAA	NM_001044633.2
	Reverse	GCAGTGCATATTCCTCCTGTGTC
ACOX1	Forward	ATGTCACGTTCACCCCATCC	NM_001006205.2
	Reverse	AGGTAGGAGACCATGCCAGT
SIRT1	Forward	TAGCCAATGGTTTCCACTCC	NM_001004767.2
	Reverse	AAGAATTGTCCGTGGGTCTG
FABP3	Forward	TCTGAAAGCTCTTGCACTGCC	NM_001030889.2
	Reverse	TCACAGTCTGCCTGGGTGTT
FABP4	Forward	GCACCTGGAAGCTCCTTTCT	NM_204290.2
	Reverse	ATTAGGCTTGGCCACACCAG
SCP2	Forward	AGGAGGCAACCTGGGTAGT	NM_001305200.2
	Reverse	ATTTGCCTTGAAAGAAGGCTGTC

## Sheet: Table S3
Supplementary Table 3. Fatty acids content in eggs among SAE groups, CGA groups and CON group
Item	CON_1	CON_2	CON_3	CON_4	CON_5	CON_6	CON_7	CON_8	SAE1000_1	SAE1000_2	SAE1000_3	SAE1000_4	SAE1000_5	SAE1000_6	SAE1000_7	SAE2000_1	SAE2000_2	SAE2000_3	SAE2000_4	SAE2000_5	SAE2000_6	SAE2000_7	SAE2000_8	CGA100_1	CGA100_2	CGA100_3	CGA100_4	CGA100_5	CGA100_6	CGA100_7	CGA200_1	CGA200_2	CGA200_3	CGA200_4	CGA200_5	CGA200_6	CGA200_7	CGA200_8	CGA400_1	CGA400_2	CGA400_3	CGA400_4	CGA400_5	CGA400_6	CGA400_7
C10:0	0.689565	0.650573	0.668052	0.655588	0.676453	0.673112	0.669261	0.672814	0.72003	0.733144	0.716545	0.764047	0.752901	0.736041	0.709302	0.691869	0.732368	0.722671	0.686465	0.716654	0.684975	0.681301	0.697204	0.664081	0.688786	0.710333	0.664849	0.653209	0.659301	0.663571	0.652997	0.636957	0.653404	0.663582	0.667238	0.628287	0.670235	0.689152	0.736488	0.753978	0.729073	0.709995	0.70819	0.716562	0.726477
C12:0	1.19889	1.10791	1.20628	1.23838	1.20471	1.14651	1.24843	1.25245	1.22623	1.25363	1.17213	1.36038	1.19004	1.30193	1.27106	1.21238	1.17971	1.17882	1.22237	1.26332	1.18289	1.17754	1.2776	1.25678	1.28268	1.17358	1.24014	1.17966	1.19835	1.17224	1.17362	1.11721	1.2102	1.23458	1.19615	1.13883	1.13164	1.20459	1.26201	1.27195	1.20258	1.18316	1.24051	1.19828	1.27983
C13:0	0.139725	0.116571	0.120485	0.118816	0.141971	0.133038	0.133484	0.134088	0.131701	0.135943	0.146771	0.148723	0.144754	0.122067	0.121643	0.135778	0.142395	0.134762	0.125802	0.13922	0.11637	0.139638	0.128047	0.144292	0.145216	0.14838	0.139834	0.1358	0.139568	0.121986	0.1434	0.127982	0.145912	0.14558	0.138448	0.130418	0.137301	0.142547	0.148875	0.142889	0.139568	0.134887	0.139437	0.145629	0.140345
C14:0	1.9354	1.83145	1.84699	1.90215	1.83365	1.86332	1.69603	1.72227	1.88019	1.97477	1.95131	2.29332	1.82664	1.99864	1.8985	1.65309	1.85412	1.73037	1.64681	1.82588	1.95859	1.952	1.85697	1.8076	1.89311	1.66999	1.89704	1.76731	2.07694	1.68593	1.75062	1.70882	1.67331	1.54859	1.50573	1.77959	1.89943	1.6862	1.8496	1.86102	1.96155	1.96111	1.69216	2.0065	1.96757
C15:0	0.261815	0.303483	0.255034	0.270231	0.247687	0.233591	0.338906	0.218235	0.226143	0.260644	0.205166	0.337228	0.297491	0.257707	0.240128	0.324132	0.252027	0.223994	0.252324	0.296602	0.271083	0.287376	0.355484	0.221988	0.231172	0.246994	0.320114	0.205352	0.256961	0.265176	0.248571	0.238461	0.298513	0.222989	0.319993	0.238778	0.314858	0.264673	0.281585	0.338498	0.31669	0.328028	0.223211	0.256802	0.244627
C16:0	75.4965	69.5301	70.6167	71.3575	70.5581	72.9842	67.6483	67.1981	73.2804	75.5937	73.2361	82.7895	74.444	74.6925	75.1196	68.6805	68.9395	67.7855	72.4408	70.9279	71.4293	68.6249	71.2163	71.5072	74.5226	69.7492	71.1428	69.0088	73.2525	67.4849	69.2452	68.9413	67.0471	66.8396	66.9246	69.4039	67.6098	65.7291	73.426	74.6234	72.9258	76.5473	72.1292	76.0797	76.6018
C17:0	0.74859	0.700237	0.616553	0.64304	0.619898	0.670316	0.747164	0.539051	0.611189	0.632047	0.550287	0.777085	0.670295	0.602331	0.581093	0.856919	0.704545	0.605538	0.774635	0.672508	0.674567	0.679154	0.886083	0.686905	0.584537	0.643185	0.803192	0.607602	0.668046	0.764922	0.657221	0.689911	0.822293	0.662497	0.753526	0.630965	0.774599	0.684754	0.735753	0.832603	0.785949	0.789459	0.702604	0.746819	0.745929
C18:0	48.01	42.7915	43.7324	47.1882	48.6183	47.1029	43.9205	42.9667	47.2603	47.4332	45.0015	51.0144	50.3851	43.8984	47.0397	44.6251	47.8531	44.9719	46.6287	44.8556	44.5443	44.8565	45.3491	48.801	44.9947	43.7642	43.4789	46.7876	44.5039	48.7517	48.3034	45.727	46.3096	45.9293	43.5698	43.2849	43.8983	41.4261	49.3505	46.0714	48.3979	47.781	50.3634	49.9996	49.7822
C20:0	0.0895177	0.0894164	0.0813364	0.0905663	0.0933221	0.0983069	0.0719191	0.0754804	0.10508	0.117443	0.100683	0.123165	0.155155	0.103008	0.117567	0.0911033	0.0854803	0.0928206	0.0872736	0.0939705	0.0837934	0.0945683	0.0956271	0.0996138	0.109826	0.0948976	0.07853	0.093545	0.0894215	0.0889351	0.0889655	0.101458	0.0874863	0.082071	0.093388	0.0917264	0.0800903	0.0822331	0.0936362	0.0953535	0.108965	0.123215	0.115546	0.111878	0.112501
C21:0	0.504206	0.66062	0.49112	0.572224	0.57156	0.471115	0.711103	0.499427	0.522379	0.626951	0.536857	0.790658	0.728308	0.581342	0.602159	0.72712	0.578751	0.672564	0.548707	0.501678	0.45424	0.576082	0.786183	0.574077	0.637793	0.550309	0.598772	0.554789	0.547885	0.544907	0.53871	0.514313	0.57469	0.579913	0.654579	0.582012	0.600489	0.57057	0.648984	0.769114	0.791606	0.857572	0.701488	0.709319	0.661541
C22:0	0.884803	0.794509	0.81423	0.848487	0.872556	0.719861	0.87716	0.757628	0.867538	0.965661	0.909715	0.992466	1.09105	1.0127	0.9205	0.791879	0.725246	0.837262	0.861409	0.825288	0.797547	0.752783	0.835973	0.920149	1.05007	0.717415	0.806714	0.767957	0.827917	0.78101	0.770545	0.881272	0.747602	0.881408	0.776443	0.794095	0.695447	0.770597	0.826016	0.879842	0.921343	0.883488	1.00379	0.849299	0.871309
C14:1	0.407677	0.423934	0.466645	0.430817	0.360382	0.367625	0.377971	0.332779	0.437869	0.348559	0.454691	0.517	0.462472	0.580661	0.462567	0.331642	0.346156	0.342571	0.293198	0.392179	0.460171	0.379496	0.360983	0.312928	0.506009	0.361472	0.390365	0.329318	0.541379	0.298707	0.350147	0.367541	0.270617	0.306589	0.298879	0.45825	0.375245	0.376609	0.369915	0.323549	0.38592	0.434964	0.338487	0.334602	0.333894
C16:1	20.0292	19.7822	21.9429	21.4003	18.3027	19.395	18.4065	16.5984	22.5921	18.7045	19.5637	24.4986	22.947	25.6084	23.1191	18.6221	17.0731	17.8471	17.8829	21.3419	21.394	20.6457	19.8088	16.4567	24.9261	17.6942	19.4615	16.5383	23.2382	15.6468	18.8341	18.9474	15.748	17.1472	16.5206	21.4894	17.8397	18.4265	19.0552	18.9861	18.6837	22.6897	18.2253	18.8533	19.7912
C17:1	0.633568	0.604464	0.570621	0.555133	0.494467	0.544199	0.654564	0.520289	0.475597	0.582064	0.442237	0.606229	0.504212	0.453918	0.461465	0.619073	0.510775	0.450481	0.496845	0.409601	0.507588	0.540312	0.599756	0.498658	0.514847	0.496784	0.60785	0.451785	0.497514	0.424366	0.472166	0.500786	0.478097	0.485299	0.555964	0.483514	0.618025	0.551578	0.593868	0.473149	0.520482	0.613649	0.500568	0.528535	0.51617
18C18:1n9c	253.921	247.455	234.022	260.081	260.083	272.722	251.038	254.246	241.467	237.478	236.439	240.255	263.512	260.511	231.473	251.947	232.741	257.642	248.285	237.699	246.554	250.084	246.059	267.924	230.654	251.453	248.887	259.722	257.188	263.556	258.528	251.829	245.658	254.788	243.704	253.545	249.058	251.864	244.431	262.111	260.975	228.302	275.186	274.755	240.702
C20:1	1.23692	1.39998	1.14274	1.24744	1.10626	1.19371	1.41212	1.12498	1.11225	1.06389	1.18136	1.48726	1.40683	1.27721	1.28249	1.37304	1.25936	1.25246	1.1419	1.34451	1.00934	1.22447	1.51641	1.16504	1.24979	1.15116	1.29026	1.0518	1.10691	1.17699	1.1953	1.18777	1.23187	1.29279	1.18402	1.20653	1.26451	1.17161	1.36014	1.40215	1.38248	1.54999	1.22624	1.25493	1.30539
C22:1n9	0.0524046	0.0432481	0.0243176	0.0370537	0.0323129	0.0327651	0.0420628	0.0287196	0.0468923	0.0613611	0.0384706	0.0777897	0.0554745	0.0509916	0.0532486	0.0440989	0.0423677	0.0601882	0.0377972	0.0369548	0.0408098	0.0713944	0.0563601	0.0270298	0.0259973	0.0290334	0.0226387	0.030737	0.0199037	0.0174564	0.016512	0.022553	0.0292217	0.0287852	0.0277603	0.0342991	0.0322705	0.0450229	0.0552663	0.0435431	0.0343741	0.0495135	0.0263131	0.0492835	0.0319371
C24:1	0.0998301	0.0971717	0.112714	0.0959678	0.0981063	0.118667	0.0879252	0.119647	0.108889	0.0950015	0.112463	0.129724	0.108144	0.0934986	0.100525	0.0795483	0.0826137	0.0986777	0.0820884	0.0897732	0.0723584	0.0903755	0.0837315	0.0901238	0.092179	0.103783	0.0726733	0.100843	0.0732745	0.0718608	0.0831628	0.0888431	0.0731611	0.0979282	0.0813011	0.0826061	0.0852082	0.0907577	0.117364	0.103011	0.106599	0.124687	0.12522	0.114243	0.109843
C18:2n6c	54.7304	67.0667	48.6824	52.5209	60.2564	50.3277	65.2492	43.5255	45.0115	54.3298	47.3542	72.7545	51.8006	53.8437	55.2146	69.693	59.0771	54.6328	67.2484	57.23	55.3935	57.916	78.1303	58.9544	57.2754	54.6344	61.0695	51.9319	52.0406	58.4987	52.1173	56.7891	67.2178	57.5354	65.7616	54.4924	65.9215	55.1691	67.5218	78.2075	73.9554	73.4685	60.9867	66.832	65.1365
C18:3n6	0.460064	0.519026	0.439191	0.425376	0.490729	0.42535	0.486609	0.29258	0.364775	0.46096	0.359833	0.522637	0.530051	0.521748	0.466717	0.443521	0.441528	0.324935	0.679271	0.58351	0.550379	0.448094	0.605257	0.449065	0.459941	0.387534	0.453627	0.357326	0.443881	0.544055	0.384688	0.50423	0.622621	0.423532	0.500546	0.458928	0.468833	0.435548	0.580243	0.529804	0.579503	0.518923	0.502463	0.463059	0.465396
C20:3n6	0.880935	0.791034	0.810672	0.824927	0.868739	0.716714	0.873322	0.754312	0.863743	0.854804	0.905739	0.988128	1.08608	1.00827	0.916472	0.788415	0.722077	0.833602	0.857643	0.82168	0.79406	0.749489	0.832315	0.916126	1.04548	0.714277	0.803184	0.764596	0.824297	0.780772	0.767176	0.87742	0.744331	0.877554	0.773047	0.790624	0.692406	0.767228	0.811297	0.847376	0.917312	0.879626	0.9994	0.845585	0.867497
C20:4n6	11.5734	10.6509	10.5156	10.8746	11.652	10.7627	11.6084	11.888	9.85176	13.3513	10.9821	12.6029	10.8998	11.4798	10.5579	11.6711	11.5163	10.205	12.6153	10.7248	12.0219	11.3333	11.5963	11.7304	10.4077	10.9325	10.9223	11.158	9.95644	12.4873	11.3628	11.7818	11.9954	11.5752	11.8248	10.1518	11.62	11.2487	12.8908	12.1124	12.2352	11.9976	11.6001	11.5591	11.3115
C18:3n3	1.23071	1.39295	1.13701	1.24118	1.10071	1.18772	1.40503	1.11933	1.10667	1.05855	1.17543	1.4798	1.39977	1.2708	1.27606	1.36616	1.25305	1.24617	1.13617	1.33776	1.00428	1.21832	1.5088	1.1592	1.24352	1.14538	1.28379	1.04653	1.10135	1.17109	1.18931	1.18181	1.22569	1.2863	1.17808	1.20048	1.25816	1.16574	1.35331	1.39512	1.37554	1.54222	1.22009	1.24863	1.29884
C20:3n3	0.0521863	0.043068	0.0242163	0.0368994	0.0321783	0.0326286	0.0418876	0.0286	0.0466969	0.0611054	0.0383103	0.0774657	0.0552434	0.0507792	0.0530268	0.0439152	0.0421912	0.0599375	0.0376398	0.0368009	0.0406397	0.071097	0.0561253	0.0269172	0.025889	0.0289124	0.0225444	0.030609	0.0198208	0.0173837	0.0164432	0.022459	0.0291	0.0286653	0.0276447	0.0341562	0.0321361	0.0448353	0.055036	0.0433617	0.0342309	0.0493073	0.0262035	0.0490782	0.0318041
C20:5n3	0.0277137	0.0340749	0.030388	0.031161	0.0410248	0.032744	0.0239483	0.024541	0.0374122	0.0430499	0.0331339	0.0492119	0.0449381	0.0420859	0.0514062	0.0357158	0.0343364	0.0324013	0.0404739	0.0353836	0.0265864	0.0362215	0.0373251	0.0360759	0.0318602	0.0377309	0.0281425	0.0246119	0.0340987	0.0277698	0.0311814	0.0409686	0.0294484	0.0378811	0.0321181	0.0302513	0.025372	0.0320126	0.0402772	0.0418352	0.0411487	0.0515481	0.046964	0.0418393	0.0388008
C22:6n3	3.33931	3.34939	3.20565	3.21644	2.71209	3.33162	3.50743	3.2877	2.86655	3.56733	2.76955	3.37582	3.11189	3.34858	2.93239	3.67007	3.34713	2.69669	3.44533	3.23164	3.5287	3.56645	3.59796	3.00889	2.79298	2.87549	3.15272	2.8884	2.69749	3.51858	3.13249	3.39999	3.83212	3.537	3.32306	3.11782	3.58424	3.27756	3.94266	2.98828	3.15943	3.37376	3.09004	2.85443	2.6692
C20:2	0.502996	0.659032	0.489944	0.570854	0.570191	0.469983	0.709395	0.498228	0.521128	0.47326	0.535571	0.78876	0.726558	0.579948	0.600712	0.725374	0.577365	0.670951	0.547393	0.514959	0.45315	0.574697	0.784295	0.572701	0.636264	0.548987	0.597333	0.553456	0.546572	0.543602	0.537417	0.51308	0.57331	0.578523	0.653009	0.580614	0.599047	0.5692	0.647428	0.767271	0.789706	0.855517	0.699806	0.707615	0.659951

## Sheet: Table S4
Supplementary Table 4. Fatty acids content in liver among SAE1000 group, CGA400 groups and CON group
Item	CON_1	CON_2	CON_3	CON_4	CON_5	CON_6	CON_7	CON_8	CON_9	CON_10	SAE1000_1	SAE1000_2	SAE1000_3	SAE1000_4	SAE1000_5	SAE1000_6	SAE1000_7	SAE1000_8	SAE1000_9	CGA400_1	CGA400_2	CGA400_3	CGA400_4	CGA400_5	CGA400_6	CGA400_7	CGA400_8	CGA400_9
C8:0	0.943938	0.823491	0.923029	0.801513	0.733121	0.89505	0.817336	0.759605	0.794992	0.693527	0.734308	0.923734	0.869289	1.4587	1.20053	1.21286	1.055	1.15413	1.03062	1.01029	1.15634	1.00422	0.973237	1.0232	1.0075	1.15806	0.958186	0.85796
C10:0	0.719858	0.725692	0.857541	0.655673	0.760772	0.748251	0.672679	0.709631	0.677096	0.66445	0.726267	0.686492	0.64191	0.721001	0.71292	0.70434	0.710093	0.702219	0.745822	0.694394	0.724365	0.728195	0.70486	0.721467	0.734169	0.770409	0.710165	0.724255
C12:0	1.71922	1.68081	2.01379	1.65945	1.74612	1.69903	1.61735	1.51961	1.63874	1.59303	1.70197	1.45539	1.61632	1.57995	1.53027	1.51004	1.61555	1.55834	1.65084	1.44738	1.4613	1.53124	1.44305	1.57625	1.57406	1.76785	1.51173	1.48621
C14:0	0.742799	1.32568	1.13021	1.18	0.591701	1.32162	1.41148	0.74212	0.64766	0.648938	0.703869	0.718264	1.28542	0.384462	1.15755	0.671211	1.66984	1.19164	0.769169	0.636212	0.572935	0.789565	1.29729	0.531746	1.09086	1.04175	0.52303	0.622701
C15:0	0.127871	0.25115	0.276261	0.150135	0.101895	0.173047	0.199752	0.210787	0.102855	0.190552	0.173289	0.144809	0.277666	0.0782177	0.206554	0.135237	0.336067	0.163368	0.0612152	0.159493	0.124287	0.29987	0.296453	0.152698	0.316583	0.208142	0.0950144	0.178945
C16:0	38.9167	51.8809	45.5082	52.9867	34.5099	52.3791	55.2506	34.9277	35.0716	33.0074	33.9816	33.7187	55.5466	24.7115	43.9459	35.2722	66.9466	48.8573	32.2997	35.0555	28.2106	37.5797	46.7088	30.1652	50.9472	47.602	27.7685	34.1797
C17:0	0.677028	0.915975	0.94359	0.912627	0.590391	0.87646	0.974773	0.755105	0.53475	0.736578	0.520299	0.540708	0.995932	0.469512	0.702858	0.748427	0.636317	0.674211	0.438591	0.705693	0.544731	0.703778	0.879092	0.54047	0.990114	0.823156	0.490454	0.656513
C18:0	39.9479	45.5932	49.5332	45.5984	40.4175	52.0517	51.6537	32.1814	36.7727	33.9797	30.0287	33.8438	43.3494	30.0955	41.3748	42.3393	37.0618	36.9528	38.5101	38.9295	33.9899	47.8235	41.3014	33.0908	44.9922	47.0527	35.8475	33.0135
C20:0	0.128189	0.142873	0.258435	0.167803	0.160365	0.168101	0.182338	0.132617	0.136263	0.159662	0.126837	0.120442	0.139109	0.127925	0.149215	0.138166	0.175801	0.131918	0.14267	0.141229	0.120644	0.275436	0.253603	0.157335	0.162484	0.199608	0.145656	0.114644
C22:0	0.130648	0.182416	0.311215	0.176777	0.296446	0.153679	0.238869	0.137209	0.172965	0.173328	0.107267	0.192714	0.202064	0.217752	0.186157	0.23597	0.189332	0.16139	0.115485	0.166961	0.104323	0.123058	0.182154	0.205026	0.124193	0.144275	0.0887079	0.105318
C23:0	17.6411	15.6159	18.7599	15.039	19.6799	15.153	19.0917	12.1144	16.0982	15.3783	14.285	15.2489	14.8731	15.7319	14.3475	15.5126	13.7112	13.439	16.0677	18.8232	15.658	14.4563	13.8441	16.3207	15.4784	19.0087	19.6336	15.3017
C16:1	3.91162	8.94699	4.76096	9.31616	2.70216	6.95631	8.21693	6.06024	3.30421	4.31457	5.46839	4.8664	9.66252	1.8461	7.84231	3.62326	5.83994	9.7243	3.68623	3.65786	2.9162	4.61754	6.59063	4.19325	6.28157	5.47701	2.82867	4.99515
C17:1	0.147106	0.249288	0.201027	0.320057	0.0631167	0.243001	0.36191	0.170954	0.0850805	0.143517	0.140646	0.0918886	0.320147	0.0655316	0.237725	0.150328	0.161436	0.191066	0.0941566	0.160858	0.0761888	0.133788	0.168494	0.0907729	0.203178	0.180436	0.0640355	0.126338
C18:1n9t	0.295221	0.437464	0.469508	0.433889	0.294073	0.498949	0.46767	0.279852	0.233834	0.321551	0.256805	0.267374	0.469613	0.108464	0.310632	0.33923	0.346392	0.436829	0.295209	0.327376	0.218277	0.26675	0.362689	0.228934	0.324644	0.329755	0.193781	0.14854
C18:1n9c	123.022	176.658	135.976	164.484	109.149	185.056	183.572	108.649	98.4391	95.4015	83.1276	100.539	170.443	60.2312	137.033	112.606	114.846	149.644	105.146	104.628	77.7856	111.536	154.441	79.4503	162.116	138.778	73.5125	101.574
C20:1	0.771508	0.726706	0.770066	0.591643	1.0658	1.10412	0.931809	0.315677	0.57745	0.845882	0.356837	0.774346	0.480606	0.377913	0.571942	0.757652	0.374116	0.569785	1.00262	0.747849	0.691184	0.772505	0.768633	0.899832	0.727887	0.917045	0.683742	0.743865
C22:1n9	1.66248	1.16942	1.6894	1.08367	1.44079	1.06521	1.33327	1.04949	1.01948	1.05945	0.870794	1.34901	0.955641	0.879473	1.05805	1.4739	1.08909	1.099	1.70911	1.37627	1.36423	1.37585	1.06022	1.42301	1.61992	1.71607	1.16988	1.29311
C24:1	0.227328	0.160749	0.273159	0.25145	0.340571	0.252739	0.290245	0.189637	0.232681	0.233067	0.211393	0.190181	0.167391	0.222217	0.150235	0.134165	0.131526	0.151815	0.214705	0.211001	0.188948	0.349689	0.234105	0.22254	0.243656	0.305109	0.224511	0.208159
C18:2n6c	46.8243	44.4908	64.358	59.9138	39.8191	39.3087	57.2402	41.3716	32.4943	36.8989	37.7044	40.2125	51.7507	30.1911	43.4228	43.8457	40.1109	42.9729	30.7868	38.0826	37.8446	55.3365	43.9372	34.5682	63.2929	55.7112	30.9087	35.7527
C18:3n6	0.292093	0.251594	0.784729	0.382414	0.265441	0.259284	0.361948	0.434466	0.139895	0.161317	0.400759	0.252068	0.434614	0.343583	0.290759	0.210073	0.748132	0.351913	0.156567	0.20244	0.234306	0.376987	0.409615	0.2069	0.514762	0.347745	0.247837	0.190652
C18:3n3	0.237074	0.25236	0.299784	0.654427	0.194939	0.260142	0.418517	0.395209	0.130332	0.155054	0.342475	0.284368	0.514377	0.185169	0.386187	0.314814	0.684428	0.585355	0.412147	0.288706	0.136	0.387827	1.08488	0.241135	0.440999	0.491803	0.234591	0.184497
C20:3n6	1.48955	1.05338	1.51906	0.973679	1.26197	0.910423	1.17136	0.869984	0.916928	0.88154	0.722411	1.16415	0.78984	0.74526	0.806215	1.22017	0.870699	0.910803	1.43999	1.1659	1.17543	0.845776	0.86322	1.2368	1.38154	1.47561	0.966713	0.966886
C22:6n3	3.41332	2.93205	2.9536	3.34619	3.87787	2.93835	4.36262	1.96355	3.73912	2.90801	2.83633	2.27295	3.28157	3.11244	3.13786	3.40415	2.83826	2.48979	3.22653	3.84243	3.10908	2.26504	2.37482	3.15206	2.88601	4.05783	4.04857	2.82637
C20:2	0.500492	0.323078	0.524492	0.401057	0.428045	0.355925	0.36156	0.271031	0.382365	0.443301	0.270433	0.487056	0.355459	0.299714	0.319368	0.508289	0.346848	0.401357	0.454856	0.425812	0.37242	0.387635	0.608867	0.368995	0.54178	0.57695	0.381838	0.437341

## Sheet: Table S5
Supplementary Table 5. Statistics of metagenome sequencing
Sample	Raw Data		Clean Data		Valid Data		Effective ratio (% )	Clean Q20% (% )	Clean Q30 (% )	Clean GC content (% )	Hostgenome rate (% )
	Read	Base	Read	Base	Read	Base
CON_1	59556530	8.93G	58375462	8.76G	58294952	8.74G	98.02	99.37	96.37	47.53	0.0011
CON_2	53751656	8.06G	52562828	7.88G	52522660	7.88G	97.79	99.36	96.3	48.32	0.0006
CON_3	54400490	8.16G	53213064	7.98G	51616656	7.74G	97.82	99.36	96.3	48.85	0.0279
CON_4	60003912	9.00G	58740938	8.81G	57816822	8.67G	97.9	99.37	96.31	48.85	0.0143
CON_5	59987680	9.00G	58966304	8.84G	58166608	8.72G	98.3	99.35	96.23	48.98	0.013
CON_6	58562878	8.78G	57456172	8.62G	57388570	8.61G	98.11	99.36	96.28	48.85	0.001
CON_7	59509578	8.93G	58210730	8.73G	52013686	7.80G	97.82	99.32	96.14	46.41	0.0996
CON_8	55996702	8.40G	54847758	8.23G	54774046	8.22G	97.95	99.35	96.28	48.78	0.0012
SAE1000_1	60437334	9.07G	59351732	8.90G	59333538	8.90G	98.2	99.33	96.04	48.31	0.0002
SAE1000_2	60478360	9.07G	59063716	8.86G	58113134	8.72G	97.66	99.32	96.07	49.36	0.0147
SAE1000_3	60524970	9.08G	59116990	8.87G	58397568	8.76G	97.67	99.33	96.2	49.36	0.0111
SAE1000_4	60276402	9.04G	58894956	8.83G	58840414	8.83G	97.71	99.45	96.68	48.2	0.0007
SAE1000_5	60145398	9.02G	58861060	8.83G	58514578	8.78G	97.86	99.37	96.29	46.88	0.005
SAE1000_6	60289254	9.04G	59007670	8.85G	58358504	8.75G	97.87	99.43	96.62	48.1	0.0097
SAE1000_7	58824918	8.82G	57403406	8.61G	57262688	8.59G	97.58	99.37	96.3	47.01	0.0019
CGA400_1	55476472	8.32G	54194152	8.13G	53653584	8.05G	97.69	99.36	96.3	47.76	0.0084
CGA400_2	58181426	8.73G	57158924	8.57G	57127188	8.57G	98.24	99.37	96.38	48.2	0.0004
CGA400_3	58035604	8.71G	56737828	8.51G	54942024	8.24G	97.76	99.32	96.14	49.31	0.029
CGA400_4	60049732	9.01G	58341574	8.75G	52577336	7.89G	97.16	99.38	96.35	46.74	0.0825
CGA400_5	60276800	9.04G	58765384	8.81G	58646304	8.80G	97.49	99.34	96.26	48.49	0.0017
CGA400_6	60430494	9.06G	59077694	8.86G	58233240	8.73G	97.76	99.39	96.4	48.58	0.0128
CGA400_7	54476688	8.17G	53199634	7.98G	52134650	7.82G	97.66	99.38	96.39	47.91	0.0167
CGA400_8	56906816	8.54G	56027154	8.40G	55326668	8.30G	98.45	99.37	96.34	47.61	0.0121

## Sheet: Table S6
Supplementary Table 6. LEfSe difference analysis of biomarkers among SAE1000 group, CGA400 group and CON group
Comparison	Taxa	Method	Group	LDA	P.unadj	Significance
A - H - I	d__Bacteria|p__Bacteroidota|c__Bacteroidia|o__Bacteroidales|f__Bacteroidaceae|g__Bacteroides	LEfSe	I	3.88547	0.037472	yes
A - H - I	d__Archaea	LEfSe	A	3.66319	0.00668194	yes
A - H - I	d__Archaea|p__Euryarchaeota|c__Methanobacteria	LEfSe	A	3.64674	0.0130484	yes
A - H - I	d__Archaea|p__Euryarchaeota|c__Methanobacteria|o__Methanobacteriales	LEfSe	A	3.64674	0.0130484	yes
A - H - I	d__Archaea|p__Euryarchaeota|c__Methanobacteria|o__Methanobacteriales|f__Methanobacteriaceae	LEfSe	A	3.64669	0.0130484	yes
A - H - I	d__Archaea|p__Euryarchaeota|c__Methanobacteria|o__Methanobacteriales|f__Methanobacteriaceae|g__Methanobrevibacter	LEfSe	A	3.64603	0.0130484	yes
A - H - I	d__Archaea|p__Euryarchaeota	LEfSe	A	3.64379	0.00834978	yes
A - H - I	d__Archaea|p__Euryarchaeota|c__Methanobacteria|o__Methanobacteriales|f__Methanobacteriaceae|g__Methanobrevibacter|s__Methanobrevibacter_woesei	LEfSe	A	3.62625	0.0150288	yes
A - H - I	d__Bacteria|p__Bacillota|c__Clostridia|o__Eubacteriales|f__Clostridiaceae	LEfSe	A	3.53594	0.0419778	yes
A - H - I	d__Bacteria|p__Bacteroidota|c__Bacteroidia|o__Bacteroidales|f__Rikenellaceae|g__Alistipes	LEfSe	A	3.32957	0.0444689	yes
A - H - I	d__Bacteria|p__Bacteroidota|c__Bacteroidia|o__Bacteroidales|f__Rikenellaceae	LEfSe	A	3.32319	0.0410991	yes
A - H - I	d__Bacteria|p__Bacillota|c__Negativicutes|o__Selenomonadales|f__Selenomonadaceae|g__Megamonas|s__Megamonas_funiformis	LEfSe	I	3.32015	0.0424696	yes
A - H - I	d__Bacteria|p__Bacillota|c__Negativicutes|o__Selenomonadales|f__Selenomonadaceae|g__Megamonas|s__Megamonas_unclassified	LEfSe	I	3.31054	0.0453316	yes
A - H - I	d__Bacteria|p__Bacteroidota|c__Bacteroidia|o__Bacteroidales|f__Bacteroidaceae|g__Bacteroides|s__Bacteroides_unclassified	LEfSe	I	3.1192	0.0398268	yes
A - H - I	d__Bacteria|p__Bacteroidota|c__Bacteroidia|o__Bacteroidales|f__Rikenellaceae|g__Alistipes|s__uncultured_Alistipes_sp.	LEfSe	A	3.0248	0.0207785	yes
A - H - I	d__Bacteria|p__Bacteroidota|c__Bacteroidia|o__Bacteroidales|f__Bacteroidaceae|g__Mediterranea|s__Mediterranea_sp._An20	LEfSe	I	2.85667	0.0261013	no
A - H - I	d__Bacteria|p__Synergistota	LEfSe	A	2.754	0.0481243	no
A - H - I	d__Bacteria|p__Synergistota|c__Synergistia	LEfSe	A	2.75299	0.0481243	no
A - H - I	d__Bacteria|p__Synergistota|c__Synergistia|o__Synergistales	LEfSe	A	2.75299	0.0481243	no
A - H - I	d__Bacteria|p__Bacteroidota|c__Bacteroidia|o__Bacteroidales|f__Bacteroidaceae|g__Bacteroides|s__Bacteroides_sp._ET225	LEfSe	I	2.64033	0.0388646	no
A - H - I	d__Bacteria|p__Bacillota|c__Clostridia|o__Eubacteriales|f__Butyricicoccaceae|g__Butyricicoccus|s__Butyricicoccus_porcorum	LEfSe	H	2.57293	0.0303502	no
A - H - I	d__Bacteria|p__Bacillota|c__Erysipelotrichia|o__Erysipelotrichales|f__Coprobacillaceae|g__Coprobacillus|s__Coprobacillus_sp._CAG:826	LEfSe	A	2.56208	0.0485088	no
A - H - I	d__Bacteria|p__Bacillota|c__Negativicutes|o__Selenomonadales|f__Selenomonadaceae|g__Megamonas|s__Megamonas_rupellensis	LEfSe	I	2.54317	0.0453316	no
A - H - I	d__Bacteria|p__Mycoplasmatota|c__Mycoplasmatota_unclassified|o__Mycoplasmatota_unclassified|f__Mycoplasmatota_unclassified|g__Mycoplasmatota_unclassified|s__Tenericutes_bacterium_ADurb.BinA155	LEfSe	A	2.28877	0.0481243	no
A - H - I	d__Bacteria|p__Bacillota|c__Negativicutes|o__Selenomonadales|f__Selenomonadaceae|g__Megamonas|s__Megamonas_sp.	LEfSe	I	2.14423	0.0444689	no
A - H - I	d__Bacteria|p__Campylobacterota|c__Epsilonproteobacteria|o__Campylobacterales|f__Helicobacteraceae|g__Helicobacter|s__Helicobacter_canis	LEfSe	H	2.05882	0.0465713	no
A - H - I	d__Bacteria|p__Bacillota|c__Clostridia|o__Eubacteriales|f__Clostridiaceae|g__Clostridium|s__Clostridium_sp._CAG:628	LEfSe	A	1.96989	0.0250491	no
A - H - I	d__Bacteria|p__Bacillota|c__Clostridia|o__Eubacteriales|f__Clostridiaceae|g__Clostridium|s__Clostridium_sp._CAG:343	LEfSe	A	1.96627	0.0418802	no
A - H - I	d__Bacteria|p__Bacillota|c__Bacillota_unclassified|o__Bacillota_unclassified|f__Bacillota_unclassified|g__Bacillota_unclassified|s__Firmicutes_bacterium_CAG:460	LEfSe	A	1.9574	0.0463729	no
A - H - I	d__Bacteria|p__Bacillota|c__Clostridia|o__Christensenellales|f__Christensenellaceae|g__Christensenella	LEfSe	H	1.95322	0.0303502	no
A - H - I	d__Archaea|p__Euryarchaeota|c__Methanobacteria|o__Methanobacteriales|f__Methanobacteriaceae|g__Methanobrevibacter|s__uncultured_Methanobrevibacter_sp.	LEfSe	A	1.89808	0.0103472	no
A - H - I	d__Bacteria|p__Mycoplasmatota|c__Mycoplasmatota_unclassified|o__Mycoplasmatota_unclassified|f__Mycoplasmatota_unclassified|g__Mycoplasmatota_unclassified|s__Tenericutes_bacterium_ADurb.Bin024	LEfSe	A	1.85459	0.0372111	no
A - H - I	d__Bacteria|p__Bacteroidota|c__Bacteroidia|o__Bacteroidales|f__Paludibacteraceae|g__Paludibacter|s__Paludibacter_propionicigenes	LEfSe	H	1.78626	0.0286667	no
A - H - I	d__Bacteria|p__Mycoplasmatota|c__Mycoplasmatota_unclassified|o__Mycoplasmatota_unclassified|f__Mycoplasmatota_unclassified|g__Mycoplasmatota_unclassified|s__Tenericutes_bacterium_ADurb.Bin239	LEfSe	A	1.76364	0.0372111	no
A - H - I	d__Bacteria|p__Bacillota|c__Clostridia|o__Eubacteriales|f__Clostridiaceae|g__Clostridium|s__Clostridium_sp._CAG:440	LEfSe	A	1.74129	0.0288509	no
A - H - I	d__Bacteria|p__Bacteroidota|c__Bacteroidia|o__Bacteroidales|f__Paludibacteraceae|g__Paludibacter|s__uncultured_Paludibacter_sp.	LEfSe	H	1.55671	0.0348956	no
A - H - I	d__Bacteria|p__Bacteroidota|c__Bacteroidota_unclassified|o__Bacteroidota_unclassified|f__Bacteroidota_unclassified|g__Bacteroidota_unclassified|s__Bacteroidetes_bacterium_ADurb.BinA395	LEfSe	H	1.55526	0.0192824	no
A - H - I	d__Bacteria|p__Bacillota|c__Negativicutes|o__Veillonellales|f__Veillonellaceae|g__Megasphaera|s__Megasphaera_butyrica	LEfSe	I	1.55411	0.0416532	no
A - H - I	d__Bacteria|p__Bacteroidota|c__Bacteroidia|o__Bacteroidales|f__Tannerellaceae|g__Parabacteroides|s__Parabacteroides_goldsteinii	LEfSe	I	1.54385	0.0317974	no
A - H - I	d__Archaea|p__Euryarchaeota|c__Methanobacteria|o__Methanobacteriales|f__Methanobacteriaceae|g__Methanobrevibacter|s__Methanobrevibacter_smithii	LEfSe	A	1.48708	0.0106902	no
A - H - I	d__Bacteria|p__Mycoplasmatota|c__Mycoplasmatota_unclassified|o__Mycoplasmoidales|f__Metamycoplasmataceae	LEfSe	H	1.45154	0.0467979	no
A - H - I	d__Viruses|p__Uroviricota|c__Caudoviricetes|o__Caudoviricetes_unclassified|f__Rountreeviridae	LEfSe	A	1.38764	0.0150609	no
A - H - I	d__Viruses|p__Uroviricota|c__Caudoviricetes|o__Caudoviricetes_unclassified|f__Rountreeviridae|g__Rountreeviridae_unclassified	LEfSe	A	1.38764	0.0150609	no
A - H - I	d__Archaea|p__Euryarchaeota|c__Methanobacteria|o__Methanobacteriales|f__Methanobacteriaceae|g__Methanobrevibacter|s__Methanobrevibacter_unclassified	LEfSe	A	1.37366	0.00881442	no
A - H - I	d__Bacteria|p__Bacillota|c__Bacilli|o__Bacillales|f__Staphylococcaceae	LEfSe	A	1.36834	0.0287838	no
A - H - I	d__Archaea|p__Euryarchaeota|c__Methanobacteria|o__Methanobacteriales|f__Methanobacteriaceae|g__Methanobrevibacter|s__Methanobrevibacter_sp.	LEfSe	A	1.35801	0.00934473	no
A - H - I	d__Bacteria|p__Chloroflexota|c__Anaerolineae	LEfSe	H	1.32874	0.0462919	no
A - H - I	d__Bacteria|p__Bacteroidota|c__Bacteroidia|o__Bacteroidales|f__Porphyromonadaceae|g__Porphyromonadaceae_unclassified|s__Porphyromonadaceae_bacterium_CG2_30_38_12	LEfSe	H	1.3139	0.0248554	no
A - H - I	d__Bacteria|p__Fusobacteriota|c__Fusobacteriia|o__Fusobacteriales|f__Leptotrichiaceae	LEfSe	H	1.30555	0.0445639	no
A - H - I	d__Bacteria|p__Mycoplasmatota|c__Mollicutes|o__Acholeplasmatales|f__Acholeplasmataceae|g__Acholeplasma|s__Acholeplasma_laidlawii	LEfSe	H	1.27803	0.0455433	no
A - H - I	d__Bacteria|p__Bacillota|c__Bacillota_unclassified|o__Bacillota_unclassified|f__Bacillota_unclassified|g__Bacillota_unclassified|s__Firmicutes_bacterium_CAG:313	LEfSe	A	1.22657	0.0462919	no
A - H - I	d__Bacteria|p__Bacillota|c__Clostridia|o__Eubacteriales|f__Clostridiaceae|g__Clostridium|s__Clostridium_sp._CAG:306	LEfSe	H	1.19906	0.0416613	no
A - H - I	d__Bacteria|p__Thermotogota	LEfSe	H	1.16988	0.0393963	no
A - H - I	d__Bacteria|p__Thermotogota|c__Thermotogae	LEfSe	H	1.16772	0.0393963	no
A - H - I	d__Bacteria|p__Bacillota|c__Clostridia|o__Eubacteriales|f__Butyricicoccaceae|g__Butyricicoccus|s__Butyricicoccus_intestinisimiae	LEfSe	H	1.13255	0.0395726	no
A - H - I	d__Viruses|p__Uroviricota|c__Caudoviricetes|o__Caudoviricetes_unclassified|f__Rountreeviridae|g__Rountreeviridae_unclassified|s__Streptococcus_phage_vB_SbRt-pBovineB21	LEfSe	A	1.11936	0.0143782	no
A - H - I	d__Bacteria|p__Synergistota|c__Synergistia|o__Synergistales|f__Synergistaceae|g__Cloacibacillus|s__Cloacibacillus_evryensis	LEfSe	H	1.10802	0.0368445	no
A - H - I	d__Bacteria|p__Bacillota|c__Bacilli|o__Lactobacillales|f__Streptococcaceae|g__Streptococcus|s__Streptococcus_gallolyticus	LEfSe	H	1.10172	0.00639765	no
A - H - I	d__Viruses|p__Uroviricota|c__Caudoviricetes|o__Caudoviricetes_unclassified|f__Rountreeviridae|g__Rountreeviridae_unclassified|s__Streptococcus_phage_vB_SbRt-pBovineS21	LEfSe	A	1.0882	0.0236161	no
A - H - I	d__Bacteria|p__Bacteroidota|c__Bacteroidota_unclassified|o__Bacteroidota_unclassified|f__Bacteroidota_unclassified|g__Bacteroidota_unclassified|s__Bacteroidetes_bacterium_ADurb.Bin174	LEfSe	H	1.08506	0.0462919	no
A - H - I	d__Bacteria|p__Bacillota|c__Erysipelotrichia|o__Erysipelotrichales|f__Coprobacillaceae|g__Sharpea	LEfSe	A	1.04825	0.0189411	no
A - H - I	d__Bacteria|p__Bacillota|c__Erysipelotrichia|o__Erysipelotrichales|f__Coprobacillaceae|g__Sharpea|s__Sharpea_azabuensis	LEfSe	A	1.0242	0.0251612	no
A - H - I	d__Viruses|p__Uroviricota|c__Caudoviricetes|o__Caudoviricetes_unclassified|f__Ackermannviridae|g__Ackermannviridae_unclassified|s__Ackermannviridae_sp.	LEfSe	A	1.00136	0.0291889	no
A - H - I	d__Bacteria|p__Bacteroidota|c__Bacteroidia|o__Bacteroidales|f__Bacteroidaceae|g__Bacteroides|s__Bacteroides_sp._AF25-18	LEfSe	A	0.998257	0.0376031	no
A - H - I	d__Viruses|p__Uroviricota|c__Caudoviricetes|o__Caudoviricetes_unclassified|f__Ackermannviridae|g__Ackermannviridae_unclassified	LEfSe	A	0.996202	0.0286667	no
A - H - I	d__Viruses|p__Uroviricota|c__Caudoviricetes|o__Caudoviricetes_unclassified|f__Ackermannviridae	LEfSe	A	0.992879	0.0328705	no
A - H - I	d__Bacteria|p__Bacteroidota|c__Bacteroidia|o__Bacteroidales|f__Rikenellaceae|g__Alistipes|s__Alistipes_sp._CHKCI003	LEfSe	A	0.939308	0.00643751	no
A - H - I	d__Viruses|p__Uroviricota|c__Caudoviricetes|o__Crassvirales|f__Suoliviridae|g__Afonbuvirus	LEfSe	H	0.878262	0.00764399	no
A - H - I	d__Bacteria|p__Pseudomonadota|c__Alphaproteobacteria|o__Rickettsiales|f__Rickettsiaceae|g__Rickettsiaceae_unclassified|s__Rickettsiaceae_bacterium_4572_127	LEfSe	A	0.867325	0.0216136	no
A - H - I	d__Bacteria|p__Bacillota|c__Bacilli|o__Bacillales|f__Listeriaceae	LEfSe	A	0.86635	0.0467979	no
A - H - I	d__Bacteria|p__Mycoplasmatota|c__Candidatus_Izimaplasma|o__Candidatus_Izemoplasmatales|f__Hujiaoplasmataceae	LEfSe	A	0.863703	0.0382732	no
A - H - I	d__Bacteria|p__Mycoplasmatota|c__Candidatus_Izimaplasma|o__Candidatus_Izemoplasmatales|f__Hujiaoplasmataceae|g__Hujiaoplasma	LEfSe	A	0.863703	0.0382732	no
A - H - I	d__Bacteria|p__Mycoplasmatota|c__Candidatus_Izimaplasma|o__Candidatus_Izemoplasmatales|f__Hujiaoplasmataceae|g__Hujiaoplasma|s__Hujiaoplasma_nucleasis	LEfSe	A	0.863703	0.0382732	no
A - H - I	d__Bacteria|p__Pseudomonadota|c__Alphaproteobacteria|o__Rickettsiales|f__Rickettsiaceae|g__Rickettsiaceae_unclassified	LEfSe	A	0.860138	0.0272612	no
A - H - I	d__Bacteria|p__Thermotogota|c__Thermotogae|o__Petrotogales	LEfSe	H	0.85854	0.0274364	no
A - H - I	d__Bacteria|p__Thermotogota|c__Thermotogae|o__Petrotogales|f__Petrotogaceae	LEfSe	H	0.85854	0.0274364	no
A - H - I	d__Bacteria|p__Mycoplasmatota|c__Mycoplasmatota_unclassified|o__Mycoplasmoidales|f__Metamycoplasmataceae|g__Metamycoplasma	LEfSe	H	0.854151	0.0319583	no
A - H - I	d__Bacteria|p__Bacillota|c__Clostridia|o__Lachnospirales|f__Lachnospiraceae|g__Roseburia|s__Roseburia_faecis	LEfSe	H	0.850761	0.0216136	no
A - H - I	d__Bacteria|p__Bacteroidota|c__Bacteroidia|o__Bacteroidales|f__Tannerellaceae|g__Parabacteroides|s__Parabacteroides_chongii	LEfSe	I	0.849282	0.0295767	no
A - H - I	d__Bacteria|p__Pseudomonadota|c__Betaproteobacteria|o__Burkholderiales|f__Sutterellaceae|g__Sutterella|s__Sutterella_sp._63_29	LEfSe	I	0.839116	0.0465713	no
A - H - I	d__Bacteria|p__Pseudomonadota|c__Alphaproteobacteria|o__Rhodospirillales|f__Rhodospirillaceae|g__Rhodospirillaceae_unclassified	LEfSe	A	0.834584	0.034943	no
A - H - I	d__Bacteria|p__Candidatus_Melainabacteria|c__Candidatus_Melainabacteria_unclassified|o__Candidatus_Gastranaerophilales|f__Candidatus_Gastranaerophilales_unclassified|g__Candidatus_Gastranaerophilales_unclassified|s__Candidatus_Gastranaerophilales_bacterium_HUM_9	LEfSe	H	0.833886	0.0276825	no
A - H - I	d__Archaea|p__Euryarchaeota|c__Thermococci|o__Thermococcales|f__Thermococcaceae|g__Thermococcus	LEfSe	A	0.824743	0.0076961	no
A - H - I	d__Archaea|p__Euryarchaeota|c__Thermococci|o__Thermococcales	LEfSe	A	0.81955	0.0105787	no
A - H - I	d__Archaea|p__Euryarchaeota|c__Thermococci|o__Thermococcales|f__Thermococcaceae	LEfSe	A	0.81955	0.0105787	no
A - H - I	d__Bacteria|p__Bacteroidota|c__Bacteroidota_unclassified|o__Bacteroidota_unclassified|f__Bacteroidota_unclassified|g__Bacteroidota_unclassified|s__Bacteroidetes_bacterium_ADurb.Bin037	LEfSe	A	0.815641	0.0286667	no
A - H - I	d__Archaea|p__Euryarchaeota|c__Thermococci	LEfSe	A	0.809607	0.00889002	no
A - H - I	d__Bacteria|p__Pseudomonadota|c__Gammaproteobacteria|o__Enterobacterales|f__Enterobacteriaceae|g__Enterobacter	LEfSe	H	0.808027	0.0161165	no
A - H - I	d__Bacteria|p__Bacillota|c__Negativicutes|o__Veillonellales|f__Veillonellaceae|g__Megasphaera|s__Megasphaera_elsdenii	LEfSe	I	0.77653	0.0280394	no
A - H - I	d__Archaea|p__Euryarchaeota|c__Thermococci|o__Thermococcales|f__Thermococcaceae|g__Thermococcus|s__Thermococcus_sp._40_45	LEfSe	A	0.773203	0.0130484	no
A - H - I	d__Archaea|p__Euryarchaeota|c__Methanobacteria|o__Methanobacteriales|f__Methanobacteriaceae|g__Methanobrevibacter|s__Methanobrevibacter_ruminantium	LEfSe	A	0.763214	0.0196146	no
A - H - I	d__Bacteria|p__Pseudomonadota|c__Alphaproteobacteria|o__Maricaulales	LEfSe	A	0.751996	0.0261419	no
A - H - I	d__Bacteria|p__Bacteroidota|c__Bacteroidia|o__Bacteroidales|f__Paludibacteraceae|g__Paludibacter|s__Paludibacter_sp._SCN_50-10	LEfSe	H	0.751599	0.0300687	no
A - H - I	d__Bacteria|p__Mycoplasmatota|c__Mycoplasmatota_unclassified|o__Mycoplasmatota_unclassified|f__Mycoplasmatota_unclassified|g__Mycoplasmatota_unclassified|s__Tenericutes_bacterium_HGW-Tenericutes-5	LEfSe	H	0.726057	0.0269194	no
A - H - I	d__Bacteria|p__Pseudomonadota|c__Gammaproteobacteria|o__Enterobacterales|f__Yersiniaceae	LEfSe	H	0.72025	0.0318592	no
A - H - I	d__Bacteria|p__Pseudomonadota|c__Alphaproteobacteria|o__Rickettsiales|f__Rickettsiales_unclassified	LEfSe	A	0.71466	0.0353043	no
A - H - I	d__Bacteria|p__Bacteroidota|c__Flavobacteriia|o__Flavobacteriales|f__Cryomorphaceae	LEfSe	A	0.712247	0.0492967	no
A - H - I	d__Bacteria|p__Bacillota|c__Erysipelotrichia|o__Erysipelotrichales|f__Erysipelotrichaceae|g__Solobacterium|s__uncultured_Solobacterium_sp.	LEfSe	A	0.710055	0.0381323	no
A - H - I	d__Bacteria|p__Bacteroidota|c__Bacteroidia|o__Bacteroidales|f__Tannerellaceae|g__Parabacteroides|s__Parabacteroides_sp._TM07-1AC	LEfSe	I	0.707299	0.0412749	no
A - H - I	d__Bacteria|p__Pseudomonadota|c__Alphaproteobacteria|o__Rickettsiales|f__Rickettsiales_unclassified|g__Rickettsiales_unclassified	LEfSe	A	0.683457	0.0345787	no
A - H - I	d__Bacteria|p__Actinomycetota|c__Actinomycetes|o__Actinomycetales|f__Actinomycetaceae|g__Actinomyces	LEfSe	I	0.672386	0.0444689	no
A - H - I	d__Viruses|p__Uroviricota|c__Caudoviricetes|o__Crassvirales|f__Suoliviridae|g__Afonbuvirus|s__Afonbuvirus_intestinihominis	LEfSe	H	0.671544	0.00446238	no
A - H - I	d__Bacteria|p__Pseudomonadota|c__Alphaproteobacteria|o__Maricaulales|f__Maricaulaceae	LEfSe	A	0.654074	0.0299464	no
A - H - I	d__Bacteria|p__Actinomycetota|c__Actinomycetes|o__Actinomycetales|f__Actinomycetaceae|g__Actinomyces|s__Actinomyces_sp._oral_taxon_849	LEfSe	I	0.640142	0.0201392	no
A - H - I	d__Bacteria|p__Pseudomonadota|c__Gammaproteobacteria|o__Enterobacterales|f__Enterobacteriaceae|g__Enterobacter|s__Enterobacter_unclassified	LEfSe	A	0.621616	0.0462919	no
A - H - I	d__Bacteria|p__Bacillota|c__Bacilli|o__Lactobacillales|f__Streptococcaceae|g__Streptococcus|s__Streptococcus_agalactiae	LEfSe	A	0.61803	0.0132526	no
A - H - I	d__Bacteria|p__Bacillota|c__Bacilli|o__Lactobacillales|f__Enterococcaceae|g__Enterococcus|s__Enterococcus_hirae	LEfSe	A	0.601872	0.00848209	no
A - H - I	d__Bacteria|p__Bacillota|c__Clostridia|o__Eubacteriales|f__Butyricicoccaceae|g__Butyricicoccus|s__Butyricicoccus_unclassified	LEfSe	H	0.601101	0.0398887	no
A - H - I	d__Archaea|p__Euryarchaeota|c__Methanobacteria|o__Methanobacteriales|f__Methanobacteriaceae|g__Methanosphaera|s__Methanosphaera_sp.	LEfSe	A	0.600789	0.0104481	no
A - H - I	d__Bacteria|p__Aquificota|c__Aquificia|o__Aquificales|f__Hydrogenothermaceae	LEfSe	H	0.596159	0.0455433	no
A - H - I	d__Bacteria|p__Thermodesulfobacteriota|c__Desulfovibrionia|o__Desulfovibrionales|f__Desulfomicrobiaceae|g__Desulfomicrobium	LEfSe	A	0.590204	0.00888657	no
A - H - I	d__Bacteria|p__Balneolota	LEfSe	A	0.5897	0.0216094	no
A - H - I	d__Bacteria|p__Balneolota|c__Balneolia	LEfSe	A	0.5897	0.0216094	no
A - H - I	d__Bacteria|p__Balneolota|c__Balneolia|o__Balneolales	LEfSe	A	0.5897	0.0216094	no
A - H - I	d__Bacteria|p__Pseudomonadota|c__Alphaproteobacteria|o__Hyphomicrobiales|f__Devosiaceae|g__Devosia	LEfSe	A	0.589195	0.046256	no
A - H - I	d__Bacteria|p__Thermodesulfobacteriota|c__Desulfovibrionia|o__Desulfovibrionales|f__Desulfomicrobiaceae	LEfSe	A	0.58745	0.00886245	no
A - H - I	d__Bacteria|p__Bacteroidota|c__Bacteroidia|o__Bacteroidales|f__Bacteroidaceae|g__Bacteroides|s__Bacteroides_sp._LFL-34	LEfSe	I	0.586282	0.00287387	no
A - H - I	d__Bacteria|p__Chlorobiota	LEfSe	A	0.583172	0.0386915	no
A - H - I	d__Viruses|p__Uroviricota|c__Caudoviricetes|o__Caudoviricetes_unclassified|f__Caudoviricetes_unclassified|g__Caudoviricetes_unclassified|s__Siphoviridae_sp._ctWdm1	LEfSe	I	0.581137	0.0467979	no
A - H - I	d__Bacteria|p__Bacillota|c__Clostridia|o__Eubacteriales|f__Clostridiaceae|g__Clostridium|s__Clostridium_homopropionicum	LEfSe	A	0.570852	0.0361152	no
A - H - I	d__Bacteria|p__Bacillota|c__Erysipelotrichia|o__Erysipelotrichales|f__Erysipelotrichaceae|g__Breznakia|s__Breznakia_blatticola	LEfSe	A	0.55936	0.0444689	no
A - H - I	d__Bacteria|p__Bacteroidota|c__Bacteroidia|o__Bacteroidales|f__Bacteroidaceae|g__Bacteroides|s__Bacteroides_sp._L10-4	LEfSe	I	0.558179	0.0386615	no
A - H - I	d__Bacteria|p__Fusobacteriota|c__Fusobacteriia|o__Fusobacteriales|f__Leptotrichiaceae|g__Leptotrichia|s__Leptotrichia_sp._oral_taxon_223	LEfSe	A	0.550678	0.0182164	no
A - H - I	d__Bacteria|p__Bacteroidota|c__Bacteroidia|o__Bacteroidales|f__Porphyromonadaceae|g__Porphyromonas|s__Porphyromonas_loveana	LEfSe	A	0.548596	0.0345384	no
A - H - I	d__Bacteria|p__Bacillota|c__Tissierellia|o__Tissierellales|f__Acidilutibacteraceae	LEfSe	A	0.545148	0.0372111	no
A - H - I	d__Bacteria|p__Bacillota|c__Tissierellia|o__Tissierellales|f__Acidilutibacteraceae|g__Acidilutibacter	LEfSe	A	0.545148	0.0372111	no
A - H - I	d__Bacteria|p__Bacillota|c__Tissierellia|o__Tissierellales|f__Acidilutibacteraceae|g__Acidilutibacter|s__Acidilutibacter_cellobiosedens	LEfSe	A	0.545148	0.0372111	no
A - H - I	d__Viruses|p__Uroviricota|c__Caudoviricetes|o__Caudoviricetes_unclassified|f__Caudoviricetes_unclassified|g__Caudoviricetes_unclassified|s__Myoviridae_sp._ctVeR24	LEfSe	I	0.539817	0.0160292	no
A - H - I	d__Bacteria|p__Balneolota|c__Balneolia|o__Balneolales|f__Balneolaceae	LEfSe	A	0.532513	0.0119338	no
A - H - I	d__Archaea|p__Euryarchaeota|c__Methanomicrobia|o__Methanotrichales	LEfSe	H	0.532186	0.019444	no
A - H - I	d__Archaea|p__Euryarchaeota|c__Methanomicrobia|o__Methanotrichales|f__Methanotrichaceae	LEfSe	H	0.532186	0.019444	no
A - H - I	d__Archaea|p__Euryarchaeota|c__Methanomicrobia|o__Methanotrichales|f__Methanotrichaceae|g__Methanothrix	LEfSe	H	0.530958	0.0161165	no
A - H - I	d__Bacteria|p__Bacillota|c__Clostridia|o__Eubacteriales|f__Clostridiaceae|g__Clostridium|s__Clostridium_sp._CAG:253	LEfSe	H	0.529012	0.0445639	no
A - H - I	d__Bacteria|p__Bacteroidota|c__Bacteroidia|o__Bacteroidales|f__Tenuifilaceae|g__Perlabentimonas	LEfSe	A	0.525878	0.0248554	no
A - H - I	d__Bacteria|p__Bacteroidota|c__Bacteroidia|o__Bacteroidales|f__Tenuifilaceae|g__Perlabentimonas|s__Perlabentimonas_gracilis	LEfSe	A	0.525878	0.0248554	no
A - H - I	d__Bacteria|p__Bacillota|c__Clostridia|o__Eubacteriales|f__Clostridiaceae|g__Clostridium|s__Clostridium_sp._CAG:411	LEfSe	I	0.517833	0.0486408	no
A - H - I	d__Bacteria|p__Bacteroidota|c__Bacteroidia|o__Bacteroidales|f__Dysgonomonadaceae|g__Dysgonomonadaceae_unclassified|s__Dysgonomonadaceae_bacterium_zrk40	LEfSe	A	0.515166	0.0462919	no
A - H - I	d__Bacteria|p__Chlorobiota|c__Chlorobiia	LEfSe	H	0.502447	0.0398268	no
A - H - I	d__Bacteria|p__Chlorobiota|c__Chlorobiia|o__Chlorobiales	LEfSe	H	0.502447	0.0398268	no
A - H - I	d__Bacteria|p__Bacillota|c__Bacillota_unclassified|o__Bacillota_unclassified|f__Bacillota_unclassified|g__Bacillota_unclassified|s__Firmicutes_bacterium_CAG:882	LEfSe	A	0.500034	0.0303502	no
A - H - I	d__Bacteria|p__Bacteroidota|c__Flavobacteriia|o__Flavobacteriales|f__Cryomorphaceae|g__Cryomorphaceae_unclassified	LEfSe	A	0.498386	0.0353043	no
A - H - I	d__Bacteria|p__Fibrobacterota|c__Fibrobacteria|o__Fibrobacterales|f__Fibrobacteraceae|g__Fibrobacter|s__Fibrobacter_sp._UBA4297	LEfSe	A	0.497319	0.00799297	no
A - H - I	d__Bacteria|p__Bacillota|c__Clostridia|o__Eubacteriales|f__Eubacteriales_unclassified|g__Levyella	LEfSe	A	0.487982	0.00925807	no
A - H - I	d__Bacteria|p__Bacillota|c__Clostridia|o__Eubacteriales|f__Eubacteriales_unclassified|g__Levyella|s__Levyella_massiliensis	LEfSe	A	0.481604	0.00808346	no
A - H - I	d__Bacteria|p__Thermodesulfobacteriota|c__Desulfovibrionia|o__Desulfovibrionales|f__Desulfovibrionaceae|g__Desulfovibrio|s__Desulfovibrio_sp._ZJ200	LEfSe	I	0.477838	0.0398887	no
A - H - I	d__Bacteria|p__Bacillota|c__Clostridia|o__Eubacteriales|f__Clostridiaceae|g__Clostridium|s__Clostridium_mediterraneense	LEfSe	H	0.477221	0.0463729	no
A - H - I	d__Bacteria|p__Bacillota|c__Clostridia|o__Eubacteriales|f__Clostridiaceae|g__Caloramator|s__Caloramator_sp._mosi_1	LEfSe	A	0.474601	0.0366733	no
A - H - I	d__Bacteria|p__Bacillota|c__Clostridia|o__Eubacteriales|f__Clostridiaceae|g__Clostridium|s__Clostridium_polyendosporum	LEfSe	H	0.473517	0.0230701	no
A - H - I	d__Bacteria|p__Bacillota|c__Bacilli|o__Lactobacillales|f__Streptococcaceae|g__Streptococcus|s__Streptococcus_anginosus	LEfSe	H	0.469327	0.0404658	no
A - H - I	d__Bacteria|p__Bacteroidota|c__Chitinophagia|o__Chitinophagales|f__Chitinophagaceae|g__Niastella	LEfSe	A	0.467834	0.00828359	no
A - H - I	d__Bacteria|p__Bacteroidota|c__Bacteroidia|o__Bacteroidales|f__Dysgonomonadaceae|g__Dysgonomonas|s__Dysgonomonas_sp._ZJ709	LEfSe	I	0.466435	0.0314049	no
A - H - I	d__Bacteria|p__Candidatus_Melainabacteria|c__Candidatus_Melainabacteria_unclassified|o__Candidatus_Melainabacteria_unclassified|f__Candidatus_Melainabacteria_unclassified|g__Candidatus_Melainabacteria_unclassified|s__Candidatus_Melainabacteria_bacterium_GWA2_34_9	LEfSe	H	0.464049	0.0462291	no
A - H - I	d__Bacteria|p__Bacteroidota|c__Sphingobacteriia|o__Sphingobacteriales|f__Sphingobacteriaceae|g__Daejeonella	LEfSe	A	0.45492	0.0300687	no
A - H - I	d__Bacteria|p__Bacteroidota|c__Cytophagia|o__Cytophagales|f__Roseivirgaceae	LEfSe	A	0.451961	0.0328387	no
A - H - I	d__Bacteria|p__Bacteroidota|c__Cytophagia|o__Cytophagales|f__Roseivirgaceae|g__Roseivirga	LEfSe	A	0.451961	0.0328387	no
A - H - I	d__Bacteria|p__Bacillota|c__Clostridia|o__Lachnospirales|f__Lachnospiraceae|g__Pseudobutyrivibrio|s__Pseudobutyrivibrio_xylanivorans	LEfSe	H	0.451111	0.0403247	no
A - H - I	d__Bacteria|p__Bacillota|c__Clostridia|o__Lachnospirales|f__Lachnospiraceae|g__Roseburia|s__Roseburia_sp._TF10-5	LEfSe	H	0.447849	0.0186891	no
A - H - I	d__Bacteria|p__Bacillota|c__Tissierellia|o__Tissierellales|f__Tissierellaceae|g__Tissierella|s__Tissierella_simiarum	LEfSe	H	0.434761	0.0234494	no
A - H - I	d__Bacteria|p__Bacillota|c__Clostridia|o__Lachnospirales|f__Lachnospiraceae|g__Lachnospiraceae_unclassified|s__Lachnospiraceae_bacterium_OF09-6	LEfSe	H	0.429761	0.0173636	no
A - H - I	d__Bacteria|p__Bacillota|c__Bacilli|o__Bacillales|f__Bacillaceae|g__Aquibacillus|s__Aquibacillus_saliphilus	LEfSe	A	0.424762	0.0421657	no
A - H - I	d__Bacteria|p__Candidatus_Uhrbacteria|c__Candidatus_Uhrbacteria_unclassified|o__Candidatus_Uhrbacteria_unclassified	LEfSe	A	0.422311	0.0463729	no
A - H - I	d__Bacteria|p__Candidatus_Uhrbacteria|c__Candidatus_Uhrbacteria_unclassified|o__Candidatus_Uhrbacteria_unclassified|f__Candidatus_Uhrbacteria_unclassified	LEfSe	A	0.422311	0.0463729	no
A - H - I	d__Bacteria|p__Candidatus_Uhrbacteria|c__Candidatus_Uhrbacteria_unclassified|o__Candidatus_Uhrbacteria_unclassified|f__Candidatus_Uhrbacteria_unclassified|g__Candidatus_Uhrbacteria_unclassified	LEfSe	A	0.422311	0.0463729	no
A - H - I	d__Bacteria|p__Candidatus_Uhrbacteria	LEfSe	A	0.422311	0.0463729	no
A - H - I	d__Bacteria|p__Candidatus_Uhrbacteria|c__Candidatus_Uhrbacteria_unclassified	LEfSe	A	0.422311	0.0463729	no
A - H - I	d__Bacteria|p__Bacillota|c__Clostridia|o__Eubacteriales|f__Desulfotomaculaceae|g__Pelotomaculum|s__Pelotomaculum_sp._PtaU1.Bin065	LEfSe	A	0.420417	0.0280775	no
A - H - I	d__Bacteria|p__Bacillota|c__Clostridia|o__Eubacteriales|f__Eubacteriaceae|g__Eubacterium|s__Eubacterium_sp._BL-380-WT-2B	LEfSe	A	0.419122	0.0143782	no
A - H - I	d__Bacteria|p__Pseudomonadota|c__Alphaproteobacteria|o__Hyphomicrobiales|f__Boseaceae	LEfSe	A	0.417081	0.0353866	no
A - H - I	d__Bacteria|p__Pseudomonadota|c__Alphaproteobacteria|o__Hyphomicrobiales|f__Boseaceae|g__Bosea	LEfSe	A	0.417081	0.0353866	no
A - H - I	d__Bacteria|p__Bacillota|c__Bacilli|o__Bacillales|f__Bacillaceae|g__Virgibacillus|s__Virgibacillus_halodenitrificans	LEfSe	I	0.407187	0.0481243	no
A - H - I	d__Bacteria|p__Bacillota|c__Clostridia|o__Eubacteriales|f__Eubacteriales_Family_XIII._Incertae_Sedis|g__Hornefia|s__Hornefia_porci	LEfSe	H	0.401177	0.0461842	no
A - H - I	d__Bacteria|p__Bacillota|c__Tissierellia|o__Tissierellales|f__Peptoniphilaceae|g__Miniphocaeibacter	LEfSe	A	0.396628	0.0248554	no
A - H - I	d__Bacteria|p__Bacillota|c__Clostridia|o__Eubacteriales|f__Eubacteriaceae|g__Eubacterium|s__Eubacterium_sp._AM46-8	LEfSe	A	0.396516	0.0245104	no
A - H - I	d__Viruses|p__Uroviricota|c__Caudoviricetes|o__Caudoviricetes_unclassified|f__Caudoviricetes_unclassified|g__Caudoviricetes_unclassified|s__Myoviridae_sp._ctiu99	LEfSe	I	0.394392	0.0461534	no
A - H - I	d__Bacteria|p__Bacteroidota|c__Flavobacteriia|o__Flavobacteriales|f__Owenweeksiaceae	LEfSe	A	0.392608	0.0211817	no
A - H - I	d__Bacteria|p__Bacteroidota|c__Flavobacteriia|o__Flavobacteriales|f__Weeksellaceae|g__Riemerella|s__Riemerella_columbipharyngis	LEfSe	I	0.385292	0.0128773	no
A - H - I	d__Bacteria|p__Bacteroidota|c__Flavobacteriia|o__Flavobacteriales|f__Weeksellaceae|g__Chryseobacterium|s__Chryseobacterium_unclassified	LEfSe	A	0.383429	0.0440394	no
A - H - I	d__Bacteria|p__Bacteroidota|c__Flavobacteriia|o__Flavobacteriales|f__Crocinitomicaceae|g__Fluviicola|s__Fluviicola_sp.	LEfSe	A	0.380621	0.0183619	no
A - H - I	d__Bacteria|p__Bacteroidota|c__Flavobacteriia|o__Flavobacteriales|f__Flavobacteriaceae|g__Sinomicrobium	LEfSe	A	0.380239	0.045235	no
A - H - I	d__Bacteria|p__Campylobacterota|c__Epsilonproteobacteria|o__Campylobacterales|f__Helicobacteraceae|g__Helicobacter|s__Helicobacter_valdiviensis	LEfSe	H	0.378149	0.00821319	no
A - H - I	d__Bacteria|p__Actinomycetota|c__Actinomycetes|o__Bifidobacteriales|f__Bifidobacteriaceae|g__Bifidobacterium|s__Bifidobacterium_animalis	LEfSe	A	0.377952	0.0404658	no
A - H - I	d__Bacteria|p__Bacteroidota|c__Sphingobacteriia|o__Sphingobacteriales|f__Sphingobacteriaceae|g__Olivibacter	LEfSe	A	0.374466	0.035113	no
A - H - I	d__Bacteria|p__Bacteroidota|c__Bacteroidota_unclassified|o__Bacteroidota_unclassified|f__Bacteroidota_unclassified|g__Bacteroidota_unclassified|s__Bacteroidetes_bacterium_GWB2_41_8	LEfSe	A	0.3716	0.0317419	no
A - H - I	d__Bacteria|p__Bacillota|c__Clostridia|o__Lachnospirales|f__Lachnospiraceae|g__Blautia|s__Blautia_sp._MSJ-36	LEfSe	H	0.370982	0.0160043	no
A - H - I	d__Bacteria|p__Bacillota|c__Clostridia|o__Eubacteriales|f__Syntrophomonadaceae|g__Syntrophomonas|s__Syntrophomonas_zehnderi	LEfSe	H	0.370898	0.0261419	no
A - H - I	d__Bacteria|p__Bacillota|c__Bacilli|o__Lactobacillales|f__Streptococcaceae|g__Streptococcus|s__Streptococcus_sanguinis	LEfSe	H	0.369058	0.0342979	no
A - H - I	d__Bacteria|p__Bacillota|c__Clostridia|o__Eubacteriales|f__Oscillospiraceae|g__Ruminococcus|s__Ruminococcus_sp._AF25-23LB	LEfSe	H	0.368341	0.0118968	no
A - H - I	d__Bacteria|p__Bacteroidota|c__Bacteroidia|o__Bacteroidales|f__Salinivirgaceae|g__Salinivirga	LEfSe	A	0.367332	0.0299464	no
A - H - I	d__Bacteria|p__Bacteroidota|c__Cytophagia|o__Cytophagales|f__Chryseotaleaceae|g__Chryseotalea	LEfSe	H	0.365541	0.0165123	no
A - H - I	d__Bacteria|p__Bacteroidota|c__Bacteroidia|o__Bacteroidales|f__Bacteroidaceae|g__Bacteroides|s__Bacteroides_sp._DH3716P	LEfSe	I	0.362915	0.0204862	no
A - H - I	d__Bacteria|p__Bacillota|c__Clostridia|o__Eubacteriales|f__Oscillospiraceae|g__Ruminococcus|s__Ruminococcus_sp._AM43-6	LEfSe	H	0.360513	0.00751162	no
A - H - I	d__Bacteria|p__Candidatus_Cloacimonadota|c__Candidatus_Cloacimonadia|o__Candidatus_Cloacimonadales|f__Candidatus_Cloacimonadaceae|g__Candidatus_Cloacimonas|s__Candidatus_Cloacimonas_sp._4484_143	LEfSe	A	0.359925	0.0114884	no
A - H - I	d__Bacteria|p__Bacteroidota|c__Bacteroidota_unclassified|o__Bacteroidota_unclassified|f__Bacteroidota_unclassified|g__Bacteroidota_unclassified|s__Bacteroidetes_bacterium_GWA2_30_7	LEfSe	A	0.359405	0.0271767	no
A - H - I	d__Bacteria|p__Bacteroidota|c__Flavobacteriia|o__Flavobacteriales|f__Flavobacteriaceae|g__Salinimicrobium|s__Salinimicrobium_tongyeongense	LEfSe	H	0.356749	0.0245104	no
A - H - I	d__Bacteria|p__Pseudomonadota|c__Gammaproteobacteria|o__Pseudomonadales|f__Pseudomonadaceae|g__Halopseudomonas	LEfSe	H	0.351312	0.0111978	no
A - H - I	d__Bacteria|p__Bacillota|c__Bacilli|o__Lactobacillales|f__Lactobacillaceae|g__Lactobacillus|s__Lactobacillus_sp.	LEfSe	A	0.350769	0.0481243	no
A - H - I	d__Bacteria|p__Bacillota|c__Clostridia|o__Eubacteriales|f__Clostridiaceae|g__Clostridiaceae_unclassified|s__Clostridiaceae_bacterium_BRH_c20a	LEfSe	H	0.34899	0.0338022	no
A - H - I	d__Bacteria|p__Bacteroidota|c__Chitinophagia|o__Chitinophagales|f__Chitinophagaceae|g__Chitinophaga|s__Chitinophaga_sp.	LEfSe	A	0.347793	0.0166863	no
A - H - I	d__Bacteria|p__Chlorobiota|c__Chlorobiia|o__Chlorobiales|f__Chlorobiaceae|g__Chlorobium	LEfSe	A	0.347626	0.0419778	no
A - H - I	d__Bacteria|p__Bacillota|c__Bacilli|o__Lactobacillales|f__Streptococcaceae|g__Streptococcus|s__Streptococcus_oralis	LEfSe	A	0.344151	0.00266332	no
A - H - I	d__Bacteria|p__Mycoplasmatota|c__Candidatus_Izimaplasma|o__Candidatus_Izimaplasma_unclassified|f__Candidatus_Izimaplasma_unclassified|g__Candidatus_Izimaplasma_unclassified|s__Candidatus_Izimaplasma_bacterium_HR2	LEfSe	A	0.341336	0.0328387	no
A - H - I	d__Viruses|p__Cressdnaviricota|c__Arfiviricetes|o__Cremevirales|f__Smacoviridae|g__Smacoviridae_unclassified	LEfSe	H	0.340458	0.0157196	no
A - H - I	d__Bacteria|p__Balneolota|c__Balneolia|o__Balneolales|f__Balneolaceae|g__Balneolaceae_unclassified	LEfSe	A	0.335669	0.00600887	no
A - H - I	d__Bacteria|p__Balneolota|c__Balneolia|o__Balneolales|f__Balneolaceae|g__Balneolaceae_unclassified|s__Balneolaceae_bacterium	LEfSe	A	0.335669	0.00600887	no
A - H - I	d__Bacteria|p__Bacteria_unclassified|c__Deltaproteobacteria|o__Bradymonadales	LEfSe	A	0.334226	0.0219348	no
A - H - I	d__Bacteria|p__Bacillota|c__Clostridia|o__Peptostreptococcales|f__Thermotaleaceae|g__Marinisporobacter	LEfSe	H	0.333678	0.0035648	no
A - H - I	d__Bacteria|p__Bacillota|c__Clostridia|o__Peptostreptococcales|f__Thermotaleaceae|g__Marinisporobacter|s__Marinisporobacter_balticus	LEfSe	H	0.333678	0.0035648	no
A - H - I	d__Bacteria|p__Pseudomonadota|c__Alphaproteobacteria|o__Maricaulales|f__Robiginitomaculaceae	LEfSe	A	0.333214	0.0491438	no
A - H - I	d__Bacteria|p__Bacteroidota|c__Flavobacteriia|o__Flavobacteriales|f__Weeksellaceae|g__Chryseobacterium|s__Chryseobacterium_viscerum	LEfSe	H	0.331648	0.0435718	no
A - H - I	d__Bacteria|p__Bacillota|c__Bacilli|o__Bacillales|f__Sporolactobacillaceae|g__Sporolactobacillus|s__Sporolactobacillus_laevolacticus	LEfSe	H	0.330244	0.0274364	no
A - H - I	d__Bacteria|p__Bacillota|c__Bacilli|o__Lactobacillales|f__Streptococcaceae|g__Streptococcus|s__Streptococcus_uberis	LEfSe	H	0.329804	0.00889002	no
A - H - I	d__Bacteria|p__Myxococcota|c__Myxococcia|o__Myxococcales|f__Myxococcaceae|g__Myxococcus|s__Myxococcus_stipitatus	LEfSe	A	0.329131	0.00629296	no
A - H - I	d__Bacteria|p__Bacillota|c__Clostridia|o__Eubacteriales|f__Clostridiaceae|g__Proteiniclasticum|s__Proteiniclasticum_aestuarii	LEfSe	H	0.325925	0.0470529	no
A - H - I	d__Bacteria|p__Bacteroidota|c__Cytophagia|o__Cytophagales|f__Leadbetterellaceae|g__Lacihabitans	LEfSe	I	0.32442	0.00349967	no
A - H - I	d__Bacteria|p__Bacteroidota|c__Bacteroidia|o__Marinilabiliales|f__Marinilabiliaceae|g__Alkalitalea	LEfSe	A	0.324329	0.0195879	no
A - H - I	d__Bacteria|p__Bacteroidota|c__Bacteroidia|o__Marinilabiliales|f__Marinilabiliaceae|g__Alkalitalea|s__Alkalitalea_saponilacus	LEfSe	A	0.324329	0.0195879	no
A - H - I	d__Bacteria|p__Pseudomonadota|c__Alphaproteobacteria|o__Maricaulales|f__Maricaulaceae|g__Hyphobacterium	LEfSe	A	0.32419	0.030133	no
A - H - I	d__Bacteria|p__Bacillota|c__Clostridia|o__Eubacteriales|f__Clostridiaceae|g__Clostridium|s__Clostridium_putrefaciens	LEfSe	H	0.323285	0.0398268	no
A - H - I	d__Viruses|p__Uroviricota|c__Caudoviricetes|o__Caudoviricetes_unclassified|f__Caudoviricetes_unclassified|g__Caudoviricetes_unclassified|s__Siphoviridae_sp._ctdd214	LEfSe	I	0.322778	0.0419778	no
A - H - I	d__Bacteria|p__Mycoplasmatota|c__Mycoplasmatota_unclassified|o__Mycoplasmoidales|f__Metamycoplasmataceae|g__Metamycoplasma|s__Metamycoplasma_hominis	LEfSe	H	0.321847	0.00714333	no
A - H - I	d__Bacteria|p__Verrucomicrobiota|c__Opitutia|o__Puniceicoccales|f__Cerasicoccaceae|g__Ruficoccus	LEfSe	H	0.321522	0.0388646	no
A - H - I	d__Bacteria|p__Pseudomonadota|c__Gammaproteobacteria|o__Enterobacterales|f__Enterobacteriaceae|g__Raoultella	LEfSe	H	0.320803	0.0251612	no
A - H - I	d__Bacteria|p__Bacillota|c__Bacilli|o__Lactobacillales|f__Enterococcaceae|g__Enterococcus|s__Enterococcus_gallinarum	LEfSe	H	0.320229	0.0444689	no
A - H - I	d__Viruses|p__Uroviricota|c__Caudoviricetes|o__Caudoviricetes_unclassified|f__Caudoviricetes_unclassified|g__Caudoviricetes_unclassified|s__Siphoviridae_sp._ctDlU28	LEfSe	A	0.320078	0.0448677	no
A - H - I	d__Bacteria|p__Bacteroidota|c__Bacteroidota_unclassified|o__Bacteroidota_unclassified|f__Bacteroidota_unclassified|g__Bacteroidota_unclassified|s__Candidatus_[Bacteroides]_periocalifornicus	LEfSe	A	0.319882	0.0457915	no
A - H - I	d__Bacteria|p__Bacillota|c__Bacilli|o__Bacillales|f__Bacillaceae|g__Microaerobacter	LEfSe	H	0.319709	0.0348617	no
A - H - I	d__Bacteria|p__Bacillota|c__Bacilli|o__Bacillales|f__Bacillaceae|g__Microaerobacter|s__Microaerobacter_geothermalis	LEfSe	H	0.319709	0.0348617	no
A - H - I	d__Bacteria|p__Pseudomonadota|c__Alphaproteobacteria|o__Holosporales|f__Candidatus_Paracaedibacteraceae	LEfSe	A	0.319515	0.0440394	no
A - H - I	d__Bacteria|p__Bacteroidota|c__Chitinophagia|o__Chitinophagales|f__Chitinophagaceae|g__Flavisolibacter	LEfSe	A	0.318624	0.0310654	no
A - H - I	d__Bacteria|p__Bacillota|c__Clostridia|o__Thermoanaerobacterales|f__Thermoanaerobacteraceae|g__Thermoanaerobacter|s__Thermoanaerobacter_unclassified	LEfSe	H	0.318363	0.0467979	no
A - H - I	d__Bacteria|p__Bacteroidota|c__Chitinophagia|o__Chitinophagales|f__Chitinophagaceae|g__Niastella|s__Niastella_soli	LEfSe	A	0.315615	0.0240159	no
A - H - I	d__Bacteria|p__Pseudomonadota|c__Alphaproteobacteria|o__Hyphomicrobiales|f__Stappiaceae|g__Pseudovibrio	LEfSe	A	0.315145	0.0386015	no
A - H - I	d__Bacteria|p__Bacillota|c__Clostridia|o__Eubacteriales|f__Clostridiaceae|g__Clostridium|s__Clostridium_sp._TF06-15AC	LEfSe	I	0.313794	0.0254955	no
A - H - I	d__Bacteria|p__Bacteroidota|c__Bacteroidia|o__Bacteroidales|f__Porphyromonadaceae|g__Lascolabacillus|s__Lascolabacillus_sp.	LEfSe	A	0.312403	0.0245104	no
A - H - I	d__Bacteria|p__Bacteroidota|c__Cytophagia|o__Cytophagales|f__Hymenobacteraceae|g__Pontibacter|s__uncultured_Pontibacter_sp.	LEfSe	H	0.310766	0.023413	no
A - H - I	d__Bacteria|p__Bacteroidota|c__Cytophagia|o__Cytophagales|f__Leadbetterellaceae|g__Lacihabitans|s__Lacihabitans_sp._LS3-19	LEfSe	A	0.305981	0.0328705	no
A - H - I	d__Bacteria|p__Bacillota|c__Tissierellia|o__Tissierellales|f__Peptoniphilaceae|g__Miniphocaeibacter|s__Miniphocaeibacter_massiliensis	LEfSe	A	0.299451	0.0190111	no
A - H - I	d__Bacteria|p__Bacillota|c__Bacilli|o__Lactobacillales|f__Lactobacillaceae|g__Lacticaseibacillus|s__Lacticaseibacillus_paracasei	LEfSe	H	0.298167	0.0474104	no
A - H - I	d__Bacteria|p__Fusobacteriota|c__Fusobacteriia|o__Fusobacteriales|f__Fusobacteriaceae|g__Fusobacterium|s__Fusobacterium_hwasookii	LEfSe	H	0.297203	0.00872082	no
A - H - I	d__Bacteria|p__Bacillota|c__Clostridia|o__Eubacteriales|f__Clostridiaceae|g__Clostridium|s__Clostridium_lundense	LEfSe	A	0.295385	0.0478542	no
A - H - I	d__Viruses|p__Cressdnaviricota|c__Arfiviricetes|o__Cremevirales|f__Smacoviridae|g__Smacoviridae_unclassified|s__Smacoviridae_sp.	LEfSe	H	0.293431	0.0143323	no
A - H - I	d__Bacteria|p__Bacteroidota|c__Sphingobacteriia|o__Sphingobacteriales|f__Sphingobacteriaceae|g__Desertivirga	LEfSe	A	0.293183	0.0286667	no
A - H - I	d__Bacteria|p__Synergistota|c__Synergistia|o__Synergistales|f__Synergistaceae|g__Cloacibacillus|s__Cloacibacillus_unclassified	LEfSe	A	0.289641	0.0488395	no
A - H - I	d__Bacteria|p__Pseudomonadota|c__Alphaproteobacteria|o__Rhodospirillales|f__Novispirillaceae|g__Haematospirillum|s__Haematospirillum_unclassified	LEfSe	A	0.285037	0.0147944	no
A - H - I	d__Viruses|p__Phixviricota|c__Malgrandaviricetes|o__Petitvirales|f__Microviridae|g__Microviridae_unclassified|s__Gokushovirinae_sp.	LEfSe	I	0.284679	0.0101404	no
A - H - I	d__Bacteria|p__Pseudomonadota|c__Alphaproteobacteria|o__Rhodospirillales|f__Rhodospirillaceae|g__Telmatospirillum|s__Telmatospirillum_sp.	LEfSe	A	0.283948	0.00764399	no
A - H - I	d__Bacteria|p__Cyanobacteriota|c__Cyanophyceae|o__Chroococcales|f__Chroococcaceae|g__Gloeocapsa|s__Gloeocapsa_sp._PCC_73106	LEfSe	A	0.281155	0.018462	no
A - H - I	d__Bacteria|p__Bacillota|c__Negativicutes|o__Selenomonadales|f__Sporomusaceae|g__Sporomusa|s__Sporomusa_malonica	LEfSe	H	0.28001	0.0179915	no
A - H - I	d__Bacteria|p__Bacillota|c__Clostridia|o__Eubacteriales|f__Oscillospiraceae|g__Ruminococcus|s__Ruminococcus_sp._OM07-7	LEfSe	H	0.277731	0.0433692	no
A - H - I	d__Bacteria|p__Bacteroidota|c__Flavobacteriia|o__Flavobacteriales|f__Owenweeksiaceae|g__Owenweeksia|s__Owenweeksia_hongkongensis	LEfSe	A	0.276921	0.0253228	no
A - H - I	d__Bacteria|p__Chloroflexota|c__Anaerolineae|o__Anaerolineales|f__Anaerolineaceae|g__Brevefilum	LEfSe	A	0.276384	0.0183619	no
A - H - I	d__Bacteria|p__Chloroflexota|c__Anaerolineae|o__Anaerolineales|f__Anaerolineaceae|g__Brevefilum|s__Brevefilum_fermentans	LEfSe	A	0.276384	0.0183619	no
A - H - I	d__Bacteria|p__Bacteroidota|c__Flavobacteriia|o__Flavobacteriales|f__Owenweeksiaceae|g__Owenweeksia	LEfSe	A	0.275892	0.0291889	no
A - H - I	d__Bacteria|p__Bacillota|c__Clostridia|o__Eubacteriales|f__Oscillospiraceae|g__Faecalibacterium|s__Faecalibacterium_sp._Marseille-P9590	LEfSe	A	0.274115	0.0194969	no
A - H - I	d__Bacteria|p__Bacteria_unclassified|c__Deltaproteobacteria|o__Deltaproteobacteria_unclassified|f__Deltaproteobacteria_unclassified|g__Deltaproteobacteria_unclassified|s__Deltaproteobacteria_bacterium_HGW-Deltaproteobacteria-6	LEfSe	A	0.273627	0.0319583	no
A - H - I	d__Viruses|p__Uroviricota|c__Caudoviricetes|o__Crassvirales|f__Suoliviridae|g__Buchavirus|s__Buchavirus_copri	LEfSe	H	0.272265	0.0292854	no
A - H - I	d__Bacteria|p__Bacteroidota|c__Bacteroidota_unclassified|o__Bacteroidota_unclassified|f__Bacteroidota_unclassified|g__Bacteroidota_unclassified|s__Bacteroidetes_bacterium_ADurb.Bin141	LEfSe	A	0.272181	0.0356625	no
A - H - I	d__Bacteria|p__Bacteroidota|c__Bacteroidota_unclassified|o__Bacteroidota_unclassified|f__Bacteroidota_unclassified|g__Bacteroidota_unclassified|s__Bacteroidetes_bacterium_RIFCSPLOWO2_12_FULL_31_6	LEfSe	A	0.2713	0.0388646	no
A - H - I	d__Bacteria|p__Deferribacterota|c__Deferribacteres|o__Deferribacterales|f__Geovibrionaceae|g__Denitrovibrio|s__Denitrovibrio_acetiphilus	LEfSe	H	0.27111	0.0388722	no
A - H - I	d__Viruses|p__Uroviricota|c__Caudoviricetes|o__Caudoviricetes_unclassified|f__Caudoviricetes_unclassified|g__Caudoviricetes_unclassified|s__Podoviridae_sp._ct1h53	LEfSe	H	0.270355	0.0488395	no
A - H - I	d__Bacteria|p__Pseudomonadota|c__Gammaproteobacteria|o__Methylococcales|f__Methylococcaceae|g__Methylocaldum	LEfSe	H	0.269739	0.00888657	no
A - H - I	d__Bacteria|p__Actinomycetota|c__Actinomycetes|o__Propionibacteriales|f__Propionibacteriaceae|g__Brooklawnia|s__Brooklawnia_cerclae	LEfSe	I	0.268746	0.0364407	no
A - H - I	d__Viruses|p__Uroviricota|c__Caudoviricetes|o__Caudoviricetes_unclassified|f__Caudoviricetes_unclassified|g__Rimavirus	LEfSe	I	0.268476	0.0159004	no
A - H - I	d__Bacteria|p__Ignavibacteriota|c__Ignavibacteria|o__Ignavibacteria_unclassified|f__Ignavibacteria_unclassified|g__Ignavibacteria_unclassified|s__Ignavibacteria_bacterium	LEfSe	A	0.268376	0.0175943	no
A - H - I	d__Bacteria|p__Cyanobacteriota|c__Cyanophyceae|o__Chroococcales|f__Chroococcaceae|g__Gloeocapsa	LEfSe	A	0.268321	0.0211817	no
A - H - I	d__Bacteria|p__Bacillota|c__Negativicutes|o__Selenomonadales|f__Sporomusaceae|g__Pelosinus|s__Pelosinus_fermentans	LEfSe	H	0.266905	0.0177625	no
A - H - I	d__Bacteria|p__Bacillota|c__Clostridia|o__Lachnospirales|f__Lachnospiraceae|g__Coprococcus|s__Coprococcus_sp._CAG:782	LEfSe	H	0.266829	0.0256145	no
A - H - I	d__Bacteria|p__Actinomycetota|c__Actinomycetes|o__Kitasatosporales|f__Streptomycetaceae|g__Kitasatospora	LEfSe	A	0.264171	0.0435718	no
A - H - I	d__Bacteria|p__Bacteroidota|c__Flavobacteriia|o__Flavobacteriales|f__Flavobacteriaceae|g__Paenimyroides	LEfSe	A	0.260883	0.0419778	no
A - H - I	d__Bacteria|p__Bacillota|c__Clostridia|o__Lachnospirales|f__Lachnospiraceae|g__Wujia	LEfSe	H	0.260786	0.0182376	no
A - H - I	d__Bacteria|p__Bacillota|c__Clostridia|o__Lachnospirales|f__Lachnospiraceae|g__Wujia|s__Wujia_chipingensis	LEfSe	H	0.260786	0.0182376	no
A - H - I	d__Bacteria|p__Actinomycetota|c__Coriobacteriia|o__Eggerthellales|f__Eggerthellaceae|g__Adlercreutzia|s__Adlercreutzia_sp._ZJ242	LEfSe	A	0.260586	0.0325341	no
A - H - I	d__Bacteria|p__Bacteroidota|c__Bacteroidia|o__Bacteroidales|f__Salinivirgaceae|g__Salinivirga|s__Salinivirga_sp.	LEfSe	A	0.260045	0.0121654	no
A - H - I	d__Bacteria|p__Bacillota|c__Clostridia|o__Eubacteriales|f__Oscillospiraceae|g__Ruminococcus|s__Ruminococcus_sp._AM42-10AC	LEfSe	I	0.259642	0.0324395	no
A - H - I	d__Bacteria|p__Pseudomonadota|c__Gammaproteobacteria|o__Methylococcales|f__Methylococcaceae|g__Methyloglobulus	LEfSe	A	0.258939	0.00523226	no
A - H - I	d__Bacteria|p__Pseudomonadota|c__Gammaproteobacteria|o__Methylococcales|f__Methylococcaceae|g__Methyloglobulus|s__Methyloglobulus_morosus	LEfSe	A	0.258939	0.00523226	no
A - H - I	d__Bacteria|p__Thermotogota|c__Thermotogae|o__Petrotogales|f__Petrotogaceae|g__Oceanotoga|s__Oceanotoga_teriensis	LEfSe	H	0.257396	0.0472726	no
A - H - I	d__Bacteria|p__Pseudomonadota|c__Alphaproteobacteria|o__Rhodospirillales|f__Terasakiellaceae|g__Terasakiella|s__Terasakiella_sp._A23	LEfSe	A	0.253685	0.0367588	no
A - H - I	d__Bacteria|p__Bacteroidota|c__Bacteroidota_unclassified|o__Bacteroidota_unclassified|f__Bacteroidota_unclassified|g__Bacteroidota_unclassified|s__Bacteroidetes_bacterium_RBG_13_42_15	LEfSe	H	0.252321	0.0163846	no
A - H - I	d__Bacteria|p__Bacteroidota|c__Sphingobacteriia|o__Sphingobacteriales|f__Sphingobacteriaceae|g__Sphingobacterium|s__Sphingobacterium_sp._ML3W	LEfSe	I	0.250771	0.0192861	no
A - H - I	d__Bacteria|p__Bacteroidota|c__Flavobacteriia|o__Flavobacteriales|f__Flavobacteriaceae|g__Flavobacterium|s__Flavobacterium_aurantiibacter	LEfSe	A	0.250521	0.0393275	no
A - H - I	d__Bacteria|p__Bacteroidota|c__Flavobacteriia|o__Flavobacteriales|f__Crocinitomicaceae|g__Taishania	LEfSe	A	0.250016	0.0491438	no
A - H - I	d__Bacteria|p__Bacteroidota|c__Flavobacteriia|o__Flavobacteriales|f__Crocinitomicaceae|g__Taishania|s__Taishania_pollutisoli	LEfSe	A	0.250016	0.0491438	no
A - H - I	d__Bacteria|p__Pseudomonadota|c__Gammaproteobacteria|o__Thiotrichales|f__Francisellaceae|g__Francisella	LEfSe	H	0.248852	0.0486408	no
A - H - I	d__Bacteria|p__Pseudomonadota|c__Alphaproteobacteria|o__Hyphomicrobiales|f__Aurantimonadaceae|g__Martelella	LEfSe	A	0.24848	0.0410991	no
A - H - I	d__Bacteria|p__Bacillota|c__Clostridia|o__Eubacteriales|f__Peptococcaceae|g__Peptococcaceae_unclassified|s__Peptococcaceae_bacterium_BRH_c4b	LEfSe	A	0.248215	0.0216136	no
A - H - I	d__Bacteria|p__Candidatus_Hydrogenedentota|c__Candidatus_Hydrogenedentota_unclassified|o__Candidatus_Hydrogenedentota_unclassified|f__Candidatus_Hydrogenedentota_unclassified|g__Candidatus_Hydrogenedentota_unclassified|s__Candidatus_Hydrogenedentes_bacterium_ADurb.Bin179	LEfSe	A	0.247735	0.00552878	no
A - H - I	d__Bacteria|p__Bacteroidota|c__Cytophagia|o__Cytophagales|f__Cytophagaceae|g__Sporocytophaga|s__Sporocytophaga_myxococcoides	LEfSe	A	0.247542	0.01296	no
A - H - I	d__Bacteria|p__Spirochaetota|c__Spirochaetota_unclassified|o__Spirochaetota_unclassified|f__Spirochaetota_unclassified|g__Spirochaetota_unclassified|s__Spirochaetes_bacterium_GWB1_36_13	LEfSe	H	0.246841	0.0462291	no
A - H - I	d__Bacteria|p__Bacteroidota|c__Cytophagia|o__Cytophagales|f__Cytophagaceae|g__Sporocytophaga	LEfSe	A	0.245713	0.0190111	no
A - H - I	d__Bacteria|p__Bacillota|c__Clostridia|o__Eubacteriales|f__Oscillospiraceae|g__Faecalibacterium|s__Faecalibacterium_sp._AF10-46	LEfSe	H	0.245699	0.0250491	no
A - H - I	d__Viruses|p__Uroviricota|c__Caudoviricetes|o__Caudoviricetes_unclassified|f__Caudoviricetes_unclassified|g__Caudoviricetes_unclassified|s__Podoviridae_sp._ctiJY10	LEfSe	I	0.243176	0.0189306	no
A - H - I	d__Bacteria|p__Bacillota|c__Clostridia|o__Eubacteriales|f__Clostridiaceae|g__Clostridium|s__Clostridium_sp._CX1	LEfSe	H	0.243078	0.0381323	no
A - H - I	d__Bacteria|p__Bacteroidota|c__Sphingobacteriia|o__Sphingobacteriales|f__Sphingobacteriaceae|g__Desertivirga|s__Desertivirga_arenae	LEfSe	A	0.242968	0.0111609	no
A - H - I	d__Viruses|p__Uroviricota|c__Caudoviricetes|o__Caudoviricetes_unclassified|f__Caudoviricetes_unclassified|g__Caudoviricetes_unclassified|s__Siphoviridae_sp._ct6h44	LEfSe	A	0.242138	0.0332449	no
A - H - I	d__Bacteria|p__Chlorobiota|c__Chlorobiia|o__Chlorobiales|f__Chlorobiaceae|g__Prosthecochloris|s__Prosthecochloris_sp._SCSIO_W1101	LEfSe	H	0.239168	0.0496423	no
A - H - I	d__Bacteria|p__Pseudomonadota|c__Gammaproteobacteria|o__Enterobacterales|f__Enterobacteriaceae|g__Citrobacter|s__Citrobacter_unclassified	LEfSe	H	0.238201	0.037472	no
A - H - I	d__Viruses|p__Uroviricota|c__Caudoviricetes|o__Caudoviricetes_unclassified|f__Caudoviricetes_unclassified|g__Caudoviricetes_unclassified|s__Siphoviridae_sp._ctQJR51	LEfSe	A	0.235042	0.0338022	no
A - H - I	d__Bacteria|p__Pseudomonadota|c__Alphaproteobacteria|o__Rhodospirillales|f__Rhodospirillaceae|g__Roseospira|s__Roseospira_marina	LEfSe	A	0.234722	0.0236367	no
A - H - I	d__Bacteria|p__Bacteroidota|c__Bacteroidia|o__Bacteroidales|f__Paludibacteraceae|g__Paludibacter|s__Paludibacter_unclassified	LEfSe	H	0.234714	0.0131833	no
A - H - I	d__Bacteria|p__Bacteroidota|c__Flavobacteriia|o__Flavobacteriales|f__Flavobacteriaceae|g__Flavobacterium|s__Flavobacterium_sp._Sd200	LEfSe	I	0.234494	0.018462	no
A - H - I	d__Bacteria|p__Pseudomonadota|c__Alphaproteobacteria|o__Rhodospirillales|f__Rhodospirillaceae|g__Elstera	LEfSe	A	0.234308	0.0478542	no
A - H - I	d__Bacteria|p__Bdellovibrionota|c__Bdellovibrionia|o__Bdellovibrionales|f__Pseudobdellovibrionaceae|g__Micavibrio|s__Micavibrio_sp._TMED27	LEfSe	A	0.232428	0.0466437	no
A - H - I	d__Bacteria|p__Bacillota|c__Negativicutes|o__Selenomonadales|f__Selenomonadaceae|g__Mitsuokella|s__Mitsuokella_sp._oral_taxon_131	LEfSe	H	0.231504	0.0120666	no
A - H - I	d__Bacteria|p__Pseudomonadota|c__Gammaproteobacteria|o__Aeromonadales|f__Aeromonadaceae|g__Aeromonas|s__Aeromonas_salmonicida	LEfSe	A	0.230559	0.0493637	no
A - H - I	d__Bacteria|p__Fusobacteriota|c__Fusobacteriia|o__Fusobacteriales|f__Leptotrichiaceae|g__Leptotrichia|s__Leptotrichia_sp._oral_taxon_879	LEfSe	H	0.229375	0.0216136	no
A - H - I	d__Bacteria|p__Bacillota|c__Bacilli|o__Bacillales|f__Bacillaceae|g__Gottfriedia	LEfSe	H	0.229109	0.033776	no
A - H - I	d__Bacteria|p__Pseudomonadota|c__Gammaproteobacteria|o__Chromatiales|f__Chromatiaceae|g__Thiocapsa	LEfSe	A	0.227696	0.00525976	no
A - H - I	d__Bacteria|p__Pseudomonadota|c__Alphaproteobacteria|o__Hyphomonadales|f__Hyphomonadaceae|g__Henriciella|s__Henriciella_sp.	LEfSe	A	0.227177	0.0103472	no
A - H - I	d__Bacteria|p__Bacillota|c__Clostridia|o__Clostridia_unclassified|f__Clostridia_unclassified|g__Candidatus_Improbicoccus|s__Candidatus_Improbicoccus_pseudotrichonymphae	LEfSe	A	0.227075	0.010657	no
A - H - I	d__Bacteria|p__Pseudomonadota|c__Alphaproteobacteria|o__Holosporales|f__Candidatus_Paracaedibacteraceae|g__Candidatus_Odyssella	LEfSe	A	0.222955	0.041107	no
A - H - I	d__Bacteria|p__Pseudomonadota|c__Alphaproteobacteria|o__Holosporales|f__Candidatus_Paracaedibacteraceae|g__Candidatus_Odyssella|s__Candidatus_Odyssella_thessalonicensis	LEfSe	A	0.222955	0.041107	no
A - H - I	d__Bacteria|p__Pseudomonadota|c__Alphaproteobacteria|o__Rhodospirillales|f__Rhodospirillaceae|g__Magnetospirillum|s__Magnetospirillum_moscoviense	LEfSe	A	0.222743	0.0386015	no
A - H - I	d__Bacteria|p__Bacteroidota|c__Bacteroidia|o__Marinilabiliales|f__Marinifilaceae|g__Labilibaculum|s__Labilibaculum_euxinus	LEfSe	I	0.220976	0.0244107	no
A - H - I	d__Bacteria|p__Bacillota|c__Bacilli|o__Lactobacillales|f__Lactobacillaceae|g__Lactobacillus|s__Lactobacillus_sp._ESL0791	LEfSe	A	0.219072	0.0496809	no
A - H - I	d__Bacteria|p__Bacteroidota|c__Flavobacteriia|o__Flavobacteriales|f__Weeksellaceae|g__Apibacter|s__Apibacter_muscae	LEfSe	A	0.21846	0.0478542	no
A - H - I	d__Bacteria|p__Bacteroidota|c__Flavobacteriia|o__Flavobacteriales|f__Flavobacteriaceae|g__Flavivirga|s__Flavivirga_rizhaonensis	LEfSe	I	0.216847	0.0284009	no
A - H - I	d__Bacteria|p__Candidatus_Kryptoniota|c__Candidatus_Kryptoniota_unclassified|o__Candidatus_Kryptoniota_unclassified|f__Candidatus_Kryptoniota_unclassified|g__Candidatus_Kryptonium	LEfSe	H	0.212921	0.00808346	no
A - H - I	d__Bacteria|p__Candidatus_Kryptoniota|c__Candidatus_Kryptoniota_unclassified|o__Candidatus_Kryptoniota_unclassified|f__Candidatus_Kryptoniota_unclassified|g__Candidatus_Kryptonium|s__Candidatus_Kryptonium_thompsonii	LEfSe	H	0.212921	0.00808346	no
A - H - I	d__Bacteria|p__Pseudomonadota|c__Alphaproteobacteria|o__Rhodospirillales|f__Thalassospiraceae|g__Thalassospira|s__Thalassospira_profundimaris	LEfSe	A	0.212041	0.015967	no
A - H - I	d__Bacteria|p__Bacillota|c__Negativicutes|o__Veillonellales|f__Veillonellaceae|g__Megasphaera|s__Megasphaera_sp._UBA4233	LEfSe	I	0.211779	0.00467458	no
A - H - I	d__Bacteria|p__Bacillota|c__Clostridia|o__Eubacteriales|f__Oscillospiraceae|g__Ruminococcus|s__Ruminococcus_sp._OM08-9BH	LEfSe	A	0.211513	0.0404109	no
A - H - I	d__Viruses|p__Uroviricota|c__Caudoviricetes|o__Caudoviricetes_unclassified|f__Caudoviricetes_unclassified|g__Caudoviricetes_unclassified|s__Siphoviridae_sp._ct3o911	LEfSe	I	0.211138	0.0454694	no
A - H - I	d__Bacteria|p__Pseudomonadota|c__Alphaproteobacteria|o__Rhodobacterales|f__Paracoccaceae|g__Pontibrevibacter	LEfSe	A	0.210991	0.0150609	no
A - H - I	d__Bacteria|p__Pseudomonadota|c__Alphaproteobacteria|o__Rhodobacterales|f__Paracoccaceae|g__Pontibrevibacter|s__Pontibrevibacter_nitratireducens	LEfSe	A	0.210991	0.0150609	no
A - H - I	d__Bacteria|p__Bacillota|c__Clostridia|o__Eubacteriales|f__Clostridiaceae|g__Clostridium|s__Clostridium_sp._Cult2	LEfSe	A	0.210967	0.0338022	no
A - H - I	d__Bacteria|p__Bacteroidota|c__Bacteroidota_unclassified|o__Bacteroidota_unclassified|f__Bacteroidota_unclassified|g__Bacteroidota_unclassified|s__Bacteroidetes_bacterium_RIFOXYB2_FULL_39_7	LEfSe	A	0.210491	0.0236276	no
A - H - I	d__Bacteria|p__Bacillota|c__Clostridia|o__Lachnospirales|f__Lachnospiraceae|g__Butyrivibrio|s__Butyrivibrio_sp._DSM_10294	LEfSe	H	0.209644	0.0317419	no
A - H - I	d__Bacteria|p__Bacteroidota|c__Sphingobacteriia|o__Sphingobacteriales|f__Sphingobacteriales_unclassified|g__Sphingobacteriales_unclassified|s__Sphingobacteriales_bacterium_JAD_PAG50586_3	LEfSe	A	0.209507	0.0324899	no
A - H - I	d__Bacteria|p__Bacteroidota|c__Flavobacteriia|o__Flavobacteriales|f__Vicingaceae|g__Vicingus	LEfSe	H	0.208076	0.0286667	no
A - H - I	d__Bacteria|p__Bacteroidota|c__Flavobacteriia|o__Flavobacteriales|f__Vicingaceae|g__Vicingus|s__Vicingus_serpentipes	LEfSe	H	0.208076	0.0286667	no
A - H - I	d__Bacteria|p__Verrucomicrobiota|c__Opitutia|o__Puniceicoccales|f__Cerasicoccaceae|g__Ruficoccus|s__Ruficoccus_sp._ZRK36	LEfSe	H	0.206726	0.0100288	no
A - H - I	d__Bacteria|p__Pseudomonadota|c__Alphaproteobacteria|o__Hyphomicrobiales|f__Rhizobiaceae|g__Agrobacterium|s__Agrobacterium_larrymoorei	LEfSe	A	0.205824	0.0143782	no
A - H - I	d__Bacteria|p__Bacillota|c__Bacilli|o__Bacillales|f__Bacillaceae|g__Litchfieldia	LEfSe	H	0.205465	0.0457915	no
A - H - I	d__Bacteria|p__Bacteroidota|c__Cytophagia|o__Cytophagales|f__Cytophagaceae|g__Spirosoma|s__Spirosoma_endbachense	LEfSe	H	0.205242	0.0496809	no
A - H - I	d__Bacteria|p__Bacillota|c__Bacilli|o__Bacillales|f__Bacillaceae|g__Siminovitchia	LEfSe	H	0.204626	0.0419778	no
A - H - I	d__Bacteria|p__Bacteroidota|c__Sphingobacteriia|o__Sphingobacteriales|f__Aurantibacillaceae	LEfSe	A	0.204367	0.0271767	no
A - H - I	d__Bacteria|p__Bacteroidota|c__Sphingobacteriia|o__Sphingobacteriales|f__Aurantibacillaceae|g__Aurantibacillus	LEfSe	A	0.204367	0.0271767	no
A - H - I	d__Bacteria|p__Bacteroidota|c__Sphingobacteriia|o__Sphingobacteriales|f__Aurantibacillaceae|g__Aurantibacillus|s__Aurantibacillus_circumpalustris	LEfSe	A	0.204367	0.0271767	no
A - H - I	d__Bacteria|p__Campylobacterota|c__Epsilonproteobacteria|o__Campylobacterales|f__Arcobacteraceae|g__Aliarcobacter|s__Aliarcobacter_skirrowii	LEfSe	H	0.20404	0.0350109	no
A - H - I	d__Bacteria|p__Bacillota|c__Bacilli|o__Lactobacillales|f__Enterococcaceae|g__Enterococcus|s__Enterococcus_asini	LEfSe	H	0.203859	0.0143308	no
A - H - I	d__Bacteria|p__Balneolota|c__Balneolia|o__Balneolales|f__Balneolaceae|g__Fodinibius	LEfSe	H	0.203579	0.0333331	no
A - H - I	d__Bacteria|p__Bacteroidota|c__Flavobacteriia|o__Flavobacteriales|f__Flavobacteriaceae|g__Flavobacterium|s__Flavobacterium_sp._UBA6031	LEfSe	H	0.203232	0.0467979	no
A - H - I	d__Bacteria|p__Bacteroidota|c__Bacteroidota_unclassified|o__Bacteroidota_unclassified|f__Bacteroidota_unclassified|g__Bacteroidota_unclassified|s__Bacteroidetes_bacterium_43-16	LEfSe	H	0.202268	0.0177625	no
A - H - I	d__Bacteria|p__Bacteroidota|c__Flavobacteriia|o__Flavobacteriales|f__Flavobacteriaceae|g__Luteirhabdus	LEfSe	A	0.201657	0.0449549	no
A - H - I	d__Bacteria|p__Bacteroidota|c__Flavobacteriia|o__Flavobacteriales|f__Flavobacteriaceae|g__Luteirhabdus|s__Luteirhabdus_pelagi	LEfSe	A	0.201657	0.0449549	no
A - H - I	d__Bacteria|p__Bacteria_unclassified|c__Deltaproteobacteria|o__Bradymonadales|f__Lujinxingiaceae	LEfSe	A	0.200522	0.0386615	no
A - H - I	d__Bacteria|p__Bacteria_unclassified|c__Deltaproteobacteria|o__Bradymonadales|f__Lujinxingiaceae|g__Lujinxingia	LEfSe	A	0.200522	0.0386615	no
A - H - I	d__Bacteria|p__Bacteroidota|c__Cytophagia|o__Cytophagales|f__Spirosomataceae|g__Dyadobacter|s__Dyadobacter_sp._LHD-138	LEfSe	H	0.199973	0.0496809	no
A - H - I	d__Bacteria|p__Bacteroidota|c__Sphingobacteriia|o__Sphingobacteriales|f__Sphingobacteriales_unclassified|g__Sphingobacteriales_unclassified|s__Sphingobacteriales_bacterium_12-47-4	LEfSe	A	0.199548	0.0478542	no
A - H - I	d__Bacteria|p__Bacillota|c__Clostridia|o__Lachnospirales|f__Lachnospiraceae|g__Candidatus_Epulonipiscium|s__Epulopiscium_sp._Nuni2H_MBin003	LEfSe	I	0.19827	0.0076961	no
A - H - I	d__Bacteria|p__Pseudomonadota|c__Gammaproteobacteria|o__Moraxellales|f__Moraxellaceae|g__Acinetobacter|s__Acinetobacter_sp.	LEfSe	I	0.198061	0.0136467	no
A - H - I	d__Viruses|p__Uroviricota|c__Caudoviricetes|o__Crassvirales|f__Suoliviridae|g__Besingivirus	LEfSe	H	0.197791	0.0317419	no
A - H - I	d__Viruses|p__Uroviricota|c__Caudoviricetes|o__Crassvirales|f__Suoliviridae|g__Besingivirus|s__Besingivirus_coli	LEfSe	H	0.197791	0.0317419	no
A - H - I	d__Bacteria|p__Bacteroidota|c__Bacteroidia|o__Marinilabiliales|f__Prolixibacteraceae|g__Mangrovibacterium|s__Mangrovibacterium_lignilyticum	LEfSe	I	0.197758	0.0419778	no
A - H - I	d__Bacteria|p__Pseudomonadota|c__Gammaproteobacteria|o__Pseudomonadales|f__Pseudomonadaceae|g__Halopseudomonas|s__Halopseudomonas_pachastrellae	LEfSe	H	0.197524	0.00806936	no
A - H - I	d__Bacteria|p__Bacteroidota|c__Sphingobacteriia|o__Sphingobacteriales|f__Sphingobacteriaceae|g__Sphingobacterium|s__Sphingobacterium_spiritivorum	LEfSe	I	0.196907	0.00206535	no
A - H - I	d__Bacteria|p__Bacillota|c__Clostridia|o__Eubacteriales|f__Eubacteriaceae|g__Acetobacterium|s__Acetobacterium_dehalogenans	LEfSe	H	0.196379	0.0416613	no
A - H - I	d__Bacteria|p__Bdellovibrionota|c__Bacteriovoracia|o__Bacteriovoracales|f__Bacteriovoracaceae|g__Bacteriovorax	LEfSe	A	0.19543	0.0432684	no
A - H - I	d__Bacteria|p__Bacillota|c__Clostridia|o__Peptostreptococcales|f__Peptostreptococcaceae|g__Peptostreptococcus|s__uncultured_Peptostreptococcus_sp.	LEfSe	A	0.194921	0.0424696	no
A - H - I	d__Viruses|p__Uroviricota|c__Caudoviricetes|o__Caudoviricetes_unclassified|f__Caudoviricetes_unclassified|g__Caudoviricetes_unclassified|s__Enterococcus_phage_H1	LEfSe	A	0.194763	0.0134921	no
A - H - I	d__Bacteria|p__Bacillota|c__Bacilli|o__Bacillales|f__Bacillaceae|g__Neobacillus|s__Neobacillus_endophyticus	LEfSe	H	0.192807	0.0382732	no
A - H - I	d__Bacteria|p__Candidatus_Buchananiibacteriota|c__Candidatus_Buchananiibacteriota_unclassified|o__Candidatus_Buchananiibacteriota_unclassified|f__Candidatus_Buchananiibacteriota_unclassified|g__Candidatus_Buchananiibacteriota_unclassified|s__Candidatus_Buchananbacteria_bacterium_RBG_13_36_9	LEfSe	I	0.192209	0.0419778	no
A - H - I	d__Bacteria|p__Pseudomonadota|c__Gammaproteobacteria|o__Pseudomonadales|f__Pseudomonadaceae|g__Entomomonas	LEfSe	A	0.192131	0.0457915	no
A - H - I	d__Bacteria|p__Actinomycetota|c__Acidimicrobiia|o__Acidimicrobiales|f__Acidimicrobiales_unclassified|g__Acidimicrobiales_unclassified|s__Acidimicrobiales_bacterium	LEfSe	A	0.190865	0.0393963	no
A - H - I	d__Bacteria|p__Spirochaetota|c__Spirochaetia|o__Spirochaetales|f__Borreliaceae|g__Borrelia|s__Borrelia_miyamotoi	LEfSe	H	0.190562	0.0335669	no
A - H - I	d__Archaea|p__Euryarchaeota|c__Thermococci|o__Thermococcales|f__Thermococcaceae|g__Thermococcus|s__Thermococcus_sp._9N3	LEfSe	A	0.190261	0.0183619	no
A - H - I	d__Bacteria|p__Myxococcota|c__Myxococcia|o__Myxococcales|f__Myxococcaceae|g__Myxococcaceae_unclassified	LEfSe	A	0.189553	0.0272983	no
A - H - I	d__Bacteria|p__Myxococcota|c__Myxococcia|o__Myxococcales|f__Myxococcaceae|g__Myxococcaceae_unclassified|s__Myxococcaceae_bacterium	LEfSe	A	0.189553	0.0272983	no
A - H - I	d__Bacteria|p__Bacteria_unclassified|c__Deltaproteobacteria|o__Bradymonadales|f__Lujinxingiaceae|g__Lujinxingia|s__Lujinxingia_litoralis	LEfSe	A	0.189445	0.0328387	no
A - H - I	d__Bacteria|p__Bacillota|c__Erysipelotrichia|o__Erysipelotrichales|f__Erysipelotrichaceae|g__Allobaculum|s__Allobaculum_unclassified	LEfSe	H	0.18913	0.0298304	no
A - H - I	d__Bacteria|p__Bacillota|c__Bacilli|o__Bacillales|f__Paenibacillaceae|g__Chengkuizengella	LEfSe	H	0.188996	0.0435718	no
A - H - I	d__Bacteria|p__Pseudomonadota|c__Gammaproteobacteria|o__Pasteurellales|f__Pasteurellaceae|g__Gallibacterium|s__Gallibacterium_genomosp._2	LEfSe	H	0.187234	0.033389	no
A - H - I	d__Bacteria|p__Pseudomonadota|c__Gammaproteobacteria|o__Legionellales|f__Legionellaceae|g__Legionella|s__Legionella_sp.	LEfSe	H	0.186825	0.00698429	no
A - H - I	d__Bacteria|p__Actinomycetota|c__Acidimicrobiia|o__Acidimicrobiales|f__Acidimicrobiales_unclassified	LEfSe	A	0.186394	0.0445639	no
A - H - I	d__Bacteria|p__Actinomycetota|c__Acidimicrobiia|o__Acidimicrobiales|f__Acidimicrobiales_unclassified|g__Acidimicrobiales_unclassified	LEfSe	A	0.186394	0.0445639	no
A - H - I	d__Bacteria|p__Bacteroidota|c__Cytophagia|o__Cytophagales|f__Reichenbachiellaceae|g__Marinoscillum|s__Marinoscillum_pacificum	LEfSe	A	0.185741	0.0356279	no
A - H - I	d__Bacteria|p__Pseudomonadota|c__Alphaproteobacteria|o__Rhodospirillales|f__Rhodospirillaceae|g__Telmatospirillum|s__Telmatospirillum_siberiense	LEfSe	A	0.185515	0.0488395	no
A - H - I	d__Bacteria|p__Bacteroidota|c__Flavobacteriia|o__Flavobacteriales|f__Flavobacteriaceae|g__Flavobacterium|s__Flavobacterium_rakeshii	LEfSe	H	0.184885	0.0422312	no
A - H - I	d__Bacteria|p__Bacteroidota|c__Flavobacteriia|o__Flavobacteriales|f__Flavobacteriaceae|g__Flavobacterium|s__Flavobacterium_sp._ov086	LEfSe	H	0.184778	0.00291318	no
A - H - I	d__Bacteria|p__Pseudomonadota|c__Alphaproteobacteria|o__Sphingomonadales|f__Sphingosinicellaceae|g__Sandarakinorhabdus	LEfSe	A	0.184662	0.0423379	no
A - H - I	d__Bacteria|p__Pseudomonadota|c__Alphaproteobacteria|o__Rhodospirillales|f__Rhodospirillales_unclassified|g__Rhodospirillales_unclassified|s__Rhodospirillales_bacterium_RIFCSPLOWO2_02_FULL_58_16	LEfSe	A	0.182734	0.00313435	no
A - H - I	d__Bacteria|p__Bacteroidota|c__Chitinophagia|o__Chitinophagales|f__Chitinophagaceae|g__Flavisolibacter|s__Flavisolibacter_nicotianae	LEfSe	A	0.182244	0.0117568	no
A - H - I	d__Bacteria|p__Pseudomonadota|c__Alphaproteobacteria|o__Hyphomicrobiales|f__Stappiaceae|g__Stappia|s__Stappia_stellulata	LEfSe	A	0.182238	0.0319149	no
A - H - I	d__Bacteria|p__Fusobacteriota|c__Fusobacteriia|o__Fusobacteriales|f__Leptotrichiaceae|g__Oceanivirga|s__Oceanivirga_miroungae	LEfSe	A	0.181723	0.0444689	no
A - H - I	d__Bacteria|p__Thermodesulfobacteriota|c__Thermodesulfobacteriota_unclassified	LEfSe	H	0.181094	0.0453316	no
A - H - I	d__Bacteria|p__Thermodesulfobacteriota|c__Thermodesulfobacteriota_unclassified|o__Thermodesulfobacteriota_unclassified	LEfSe	H	0.181094	0.0453316	no
A - H - I	d__Bacteria|p__Thermodesulfobacteriota|c__Thermodesulfobacteriota_unclassified|o__Thermodesulfobacteriota_unclassified|f__Thermodesulfobacteriota_unclassified	LEfSe	H	0.181094	0.0453316	no
A - H - I	d__Bacteria|p__Thermodesulfobacteriota|c__Thermodesulfobacteriota_unclassified|o__Thermodesulfobacteriota_unclassified|f__Thermodesulfobacteriota_unclassified|g__Thermodesulfobacteriota_unclassified	LEfSe	H	0.181094	0.0453316	no
A - H - I	d__Bacteria|p__Thermodesulfobacteriota|c__Thermodesulfobacteriota_unclassified|o__Thermodesulfobacteriota_unclassified|f__Thermodesulfobacteriota_unclassified|g__Thermodesulfobacteriota_unclassified|s__Thermodesulfobacteriota_bacterium	LEfSe	H	0.181094	0.0453316	no
A - H - I	d__Bacteria|p__Pseudomonadota|c__Gammaproteobacteria|o__Pseudomonadales|f__Pseudomonadaceae|g__Pseudomonas|s__Pseudomonas_sp._10-1B	LEfSe	H	0.180632	0.0353312	no
A - H - I	d__Bacteria|p__Bacteroidota|c__Bacteroidia|o__Bacteroidales|f__Prevotellaceae|g__Prevotella|s__Prevotella_sp._AM23-5	LEfSe	I	0.179772	0.0140227	no
A - H - I	d__Bacteria|p__Pseudomonadota|c__Alphaproteobacteria|o__Hyphomicrobiales|f__Hyphomicrobiaceae|g__Methyloceanibacter	LEfSe	A	0.179311	0.0376031	no
A - H - I	d__Bacteria|p__Candidatus_Falkowbacteria|c__Candidatus_Falkowbacteria_unclassified|o__Candidatus_Falkowbacteria_unclassified|f__Candidatus_Falkowbacteria_unclassified|g__Candidatus_Falkowbacteria_unclassified|s__Candidatus_Falkowbacteria_bacterium_CG11_big_fil_rev_8_21_14_0_20_39_10	LEfSe	H	0.179297	0.0462291	no
A - H - I	d__Bacteria|p__Bacteroidota|c__Sphingobacteriia|o__Sphingobacteriales|f__Sphingobacteriaceae|g__Pedobacter|s__Pedobacter_montanisoli	LEfSe	A	0.178809	0.0423379	no
A - H - I	d__Bacteria|p__Pseudomonadota|c__Alphaproteobacteria|o__Maricaulales|f__Robiginitomaculaceae|g__Algimonas	LEfSe	A	0.17822	0.0341186	no
A - H - I	d__Bacteria|p__Bacillota|c__Clostridia|o__Eubacteriales|f__Clostridiaceae|g__Pilosibacter	LEfSe	H	0.178174	0.0214631	no
A - H - I	d__Bacteria|p__Bacillota|c__Clostridia|o__Eubacteriales|f__Clostridiaceae|g__Pilosibacter|s__Pilosibacter_fragilis	LEfSe	H	0.178174	0.0214631	no
A - H - I	d__Bacteria|p__Pseudomonadota|c__Alphaproteobacteria|o__Alphaproteobacteria_unclassified|f__Alphaproteobacteria_unclassified|g__Alphaproteobacteria_unclassified|s__Alphaproteobacteria_bacterium_MarineAlpha3_Bin7	LEfSe	A	0.176128	0.0210056	no
A - H - I	d__Bacteria|p__Thermodesulfobacteriota|c__Desulfobacteria|o__Desulfobacterales|f__Desulfobacteraceae|g__Desulfobacter|s__Desulfobacter_hydrogenophilus	LEfSe	I	0.175425	0.0393275	no
A - H - I	d__Bacteria|p__Bacillota|c__Clostridia|o__Eubacteriales|f__Oscillospiraceae|g__Ruminococcus|s__Ruminococcus_sp._AM22-13	LEfSe	H	0.175249	0.0230701	no
A - H - I	d__Archaea|p__Euryarchaeota|c__Methanobacteria|o__Methanobacteriales|f__Methanobacteriaceae|g__Methanosphaera|s__Methanosphaera_sp._rholeuAM6	LEfSe	A	0.174361	0.0306819	no
A - H - I	d__Bacteria|p__Actinomycetota|c__Coriobacteriia|o__Coriobacteriales|f__Coriobacteriaceae|g__Olegusella|s__uncultured_Olegusella_sp.	LEfSe	H	0.174168	0.0343046	no
A - H - I	d__Bacteria|p__Bacillota|c__Bacilli|o__Bacillales|f__Bacillaceae|g__Bacillus|s__Bacillus_sp._SLBN-46	LEfSe	A	0.173944	0.0124811	no
A - H - I	d__Bacteria|p__Candidatus_Woesebacteria|c__Candidatus_Woesebacteria_unclassified|o__Candidatus_Woesebacteria_unclassified|f__Candidatus_Woesebacteria_unclassified|g__Candidatus_Woesebacteria_unclassified|s__Candidatus_Woesebacteria_bacterium_RBG_16_34_12	LEfSe	I	0.173189	0.0424345	no
A - H - I	d__Bacteria|p__Pseudomonadota|c__Alphaproteobacteria|o__Rhodospirillales|f__Rhodospirillaceae|g__Magnetospirillum|s__Magnetospirillum_sp._64-120	LEfSe	A	0.171727	0.0103472	no
A - H - I	d__Bacteria|p__Bacteria_unclassified|c__Deltaproteobacteria|o__Bradymonadales|f__Bradymonadaceae	LEfSe	A	0.171177	0.00328381	no
A - H - I	d__Bacteria|p__Bacillota|c__Clostridia|o__Eubacteriales|f__Oscillospiraceae|g__Amygdalobacter|s__Amygdalobacter_indicium	LEfSe	A	0.170426	0.0397188	no
A - H - I	d__Bacteria|p__Bacillota|c__Clostridia|o__Eubacteriales|f__Clostridiaceae|g__Clostridium|s__Clostridium_sp._CAG:12237_41	LEfSe	H	0.169628	0.0213675	no
A - H - I	d__Bacteria|p__Myxococcota|c__Myxococcota_unclassified|o__Polyangiales|f__Polyangiaceae|g__Sorangium|s__Sorangium_cellulosum	LEfSe	H	0.169306	0.0368445	no
A - H - I	d__Bacteria|p__Pseudomonadota|c__Gammaproteobacteria|o__Pasteurellales|f__Pasteurellaceae|g__Pasteurellaceae_unclassified|s__[Haemophilus]_felis	LEfSe	I	0.169221	0.0320561	no
A - H - I	d__Bacteria|p__Synergistota|c__Synergistia|o__Synergistales|f__Dethiosulfovibrionaceae|g__Pyramidobacter|s__Pyramidobacter_sp._C12-8	LEfSe	H	0.168743	0.0485088	no
A - H - I	d__Bacteria|p__Pseudomonadota|c__Alphaproteobacteria|o__Rhodospirillales|f__Acetobacteraceae|g__Granulibacter	LEfSe	A	0.167745	0.02233	no
A - H - I	d__Bacteria|p__Pseudomonadota|c__Alphaproteobacteria|o__Rhodospirillales|f__Acetobacteraceae|g__Granulibacter|s__Granulibacter_bethesdensis	LEfSe	A	0.167745	0.02233	no
A - H - I	d__Bacteria|p__Pseudomonadota|c__Betaproteobacteria|o__Burkholderiales|f__Oxalobacteraceae|g__Herbaspirillum|s__Herbaspirillum_sp._C7C8	LEfSe	H	0.167677	0.0138415	no
A - H - I	d__Bacteria|p__Bacillota|c__Bacilli|o__Lactobacillales|f__Carnobacteriaceae|g__Jeotgalibaca|s__Jeotgalibaca_caeni	LEfSe	A	0.167213	0.0299464	no
A - H - I	d__Viruses|p__Viruses_unclassified|c__Viruses_unclassified|o__Viruses_unclassified|f__Viruses_unclassified|g__Viruses_unclassified|s__virus_sp._ct5rm7	LEfSe	H	0.167074	0.0381323	no
A - H - I	d__Bacteria|p__Ignavibacteriota|c__Ignavibacteria|o__Ignavibacteriales|f__Melioribacteraceae|g__Stygiobacter|s__Stygiobacter_electus	LEfSe	H	0.165032	0.0419778	no
A - H - I	d__Bacteria|p__Pseudomonadota|c__Alphaproteobacteria|o__Sphingomonadales|f__Sphingomonadaceae|g__Sphingomicrobium|s__Sphingomicrobium_astaxanthinifaciens	LEfSe	A	0.164739	0.0335669	no
A - H - I	d__Bacteria|p__Pseudomonadota|c__Betaproteobacteria|o__Burkholderiales|f__Comamonadaceae|g__Ottowia	LEfSe	H	0.164577	0.0241562	no
A - H - I	d__Bacteria|p__Candidatus_Microgenomates|c__Candidatus_Microgenomates_unclassified|o__Candidatus_Microgenomates_unclassified|f__Candidatus_Microgenomates_unclassified|g__Candidatus_Microgenomates_unclassified|s__Candidatus_Microgenomates_bacterium	LEfSe	A	0.163992	0.0438092	no
A - H - I	d__Bacteria|p__Pseudomonadota|c__Betaproteobacteria|o__Burkholderiales|f__Alcaligenaceae|g__Bordetella|s__Bordetella_sp._SCN_68-11	LEfSe	I	0.163523	0.0462919	no
A - H - I	d__Bacteria|p__Candidatus_Microgenomates	LEfSe	A	0.163176	0.0412749	no
A - H - I	d__Bacteria|p__Candidatus_Microgenomates|c__Candidatus_Microgenomates_unclassified	LEfSe	A	0.163176	0.0412749	no
A - H - I	d__Bacteria|p__Candidatus_Microgenomates|c__Candidatus_Microgenomates_unclassified|o__Candidatus_Microgenomates_unclassified	LEfSe	A	0.163176	0.0412749	no
A - H - I	d__Bacteria|p__Candidatus_Microgenomates|c__Candidatus_Microgenomates_unclassified|o__Candidatus_Microgenomates_unclassified|f__Candidatus_Microgenomates_unclassified	LEfSe	A	0.163176	0.0412749	no
A - H - I	d__Bacteria|p__Candidatus_Microgenomates|c__Candidatus_Microgenomates_unclassified|o__Candidatus_Microgenomates_unclassified|f__Candidatus_Microgenomates_unclassified|g__Candidatus_Microgenomates_unclassified	LEfSe	A	0.163176	0.0412749	no
A - H - I	d__Bacteria|p__Atribacterota|c__Atribacterota_unclassified|o__Atribacterota_unclassified|f__Atribacterota_unclassified|g__Atribacterota_unclassified|s__Candidatus_Atribacteria_bacterium_HGW-Atribacteria-1	LEfSe	A	0.162711	0.0132526	no
A - H - I	d__Bacteria|p__Candidatus_Omnitrophota|c__Candidatus_Omnitrophota_unclassified|o__Candidatus_Omnitrophota_unclassified|f__Candidatus_Omnitrophota_unclassified|g__Candidatus_Omnitrophota_unclassified|s__Candidatus_Omnitrophica_bacterium_CG1_02_46_14	LEfSe	A	0.162193	0.00603107	no
A - H - I	d__Bacteria|p__Bacteroidota|c__Flavobacteriia|o__Flavobacteriales|f__Flavobacteriaceae|g__Mariniflexile|s__Mariniflexile_sp._TRM1-10	LEfSe	A	0.162184	0.00751162	no
A - H - I	d__Bacteria|p__Bacteroidota|c__Bacteroidia|o__Bacteroidales|f__Tannerellaceae|g__Parabacteroides|s__Parabacteroides_sp._PFB2-12	LEfSe	I	0.16164	0.0422312	no
A - H - I	d__Bacteria|p__Pseudomonadota|c__Gammaproteobacteria|o__Pasteurellales|f__Pasteurellaceae|g__Aggregatibacter|s__uncultured_Aggregatibacter_sp.	LEfSe	A	0.161509	0.0280394	no
A - H - I	d__Bacteria|p__Candidatus_Mcinerneyibacteriota	LEfSe	H	0.161068	0.00550629	no
A - H - I	d__Bacteria|p__Candidatus_Mcinerneyibacteriota|c__Candidatus_Mcinerneyibacteria	LEfSe	H	0.161068	0.00550629	no
A - H - I	d__Bacteria|p__Candidatus_Mcinerneyibacteriota|c__Candidatus_Mcinerneyibacteria|o__Candidatus_Mcinerneyibacteriales	LEfSe	H	0.161068	0.00550629	no
A - H - I	d__Bacteria|p__Candidatus_Mcinerneyibacteriota|c__Candidatus_Mcinerneyibacteria|o__Candidatus_Mcinerneyibacteriales|f__Candidatus_Mcinerneyibacteriaceae	LEfSe	H	0.161068	0.00550629	no
A - H - I	d__Bacteria|p__Candidatus_Mcinerneyibacteriota|c__Candidatus_Mcinerneyibacteria|o__Candidatus_Mcinerneyibacteriales|f__Candidatus_Mcinerneyibacteriaceae|g__Candidatus_Mcinerneyibacterium	LEfSe	H	0.161068	0.00550629	no
A - H - I	d__Bacteria|p__Candidatus_Mcinerneyibacteriota|c__Candidatus_Mcinerneyibacteria|o__Candidatus_Mcinerneyibacteriales|f__Candidatus_Mcinerneyibacteriaceae|g__Candidatus_Mcinerneyibacterium|s__Candidatus_Mcinerneyibacterium_aminivorans	LEfSe	H	0.161068	0.00550629	no
A - H - I	d__Bacteria|p__Bacteroidota|c__Chitinophagia|o__Chitinophagales|f__Chitinophagaceae|g__Ferruginibacter|s__Ferruginibacter_lapsinanis	LEfSe	H	0.160721	0.0329728	no
A - H - I	d__Bacteria|p__Bdellovibrionota|c__Oligoflexia|o__Silvanigrellales	LEfSe	H	0.159934	0.00468698	no
A - H - I	d__Eukaryota|p__Chytridiomycota|c__Chytridiomycetes|o__Rhizophydiales	LEfSe	A	0.158649	0.00590044	no
A - H - I	d__Bacteria|p__Bacteroidota|c__Bacteroidota_unclassified|o__Bacteroidota_unclassified|f__Bacteroidota_unclassified|g__Bacteroidota_unclassified|s__Bacteroidetes_bacterium_GWA2_40_14	LEfSe	H	0.157744	0.00407806	no
A - H - I	d__Bacteria|p__Actinomycetota|c__Actinomycetes|o__Micrococcales|f__Microbacteriaceae|g__Clavibacter|s__Clavibacter_sp.	LEfSe	I	0.157249	0.0462919	no
A - H - I	d__Bacteria|p__Candidatus_Zambryskiibacteriota|c__Candidatus_Zambryskiibacteriota_unclassified|o__Candidatus_Zambryskiibacteriota_unclassified|f__Candidatus_Zambryskiibacteriota_unclassified|g__Candidatus_Zambryskiibacteriota_unclassified|s__Candidatus_Zambryskibacteria_bacterium_CG10_big_fil_rev_8_21_14_0_10_42_12	LEfSe	A	0.156688	0.00616362	no
A - H - I	d__Bacteria|p__Bacteroidota|c__Cytophagia|o__Cytophagales|f__Cyclobacteriaceae|g__Algoriphagus|s__Algoriphagus_sp._oki45	LEfSe	A	0.155858	0.0307952	no
A - H - I	d__Bacteria|p__Actinomycetota|c__Actinomycetes|o__Micrococcales|f__Microbacteriaceae|g__Clavibacter	LEfSe	I	0.155729	0.0467979	no
A - H - I	d__Bacteria|p__Cyanobacteriota|c__Cyanophyceae|o__Nostocales|f__Calotrichaceae|g__Calothrix	LEfSe	H	0.154674	0.0470529	no
A - H - I	d__Bacteria|p__Bacteroidota|c__Flavobacteriia|o__Flavobacteriales|f__Flavobacteriaceae|g__Polaribacter|s__Polaribacter_unclassified	LEfSe	H	0.154357	0.0412749	no
A - H - I	d__Bacteria|p__Bacteroidota|c__Flavobacteriia|o__Flavobacteriales|f__Flavobacteriaceae|g__Zobellia|s__Zobellia_uliginosa	LEfSe	I	0.15368	0.0117568	no
A - H - I	d__Bacteria|p__Bacteroidota|c__Cytophagia|o__Cytophagales|f__Flammeovirgaceae|g__Flexithrix	LEfSe	A	0.15361	0.0282524	no
A - H - I	d__Bacteria|p__Bacteroidota|c__Cytophagia|o__Cytophagales|f__Flammeovirgaceae|g__Flexithrix|s__Flexithrix_dorotheae	LEfSe	A	0.15361	0.0282524	no
A - H - I	d__Bacteria|p__Bacillota|c__Erysipelotrichia|o__Erysipelotrichales|f__Coprobacillaceae|g__Kandleria|s__Kandleria_unclassified	LEfSe	I	0.153307	0.0348956	no
A - H - I	d__Bacteria|p__Bacteroidota|c__Chitinophagia|o__Chitinophagales|f__Chitinophagaceae|g__Chitinophaga|s__Chitinophaga_terrae_(ex_Kim_and_Jung_2007)	LEfSe	H	0.153206	0.0433692	no
A - H - I	d__Viruses|p__Phixviricota|c__Malgrandaviricetes|o__Petitvirales|f__Microviridae|g__Microvirus|s__Chicken_microvirus_mg7_14	LEfSe	I	0.153083	0.0253362	no
A - H - I	d__Bacteria|p__Bacillota|c__Clostridia|o__Eubacteriales|f__Oscillospiraceae|g__Ruminococcus|s__Ruminococcus_sp._AF26-25AA	LEfSe	A	0.152919	0.0381323	no
A - H - I	d__Bacteria|p__Pseudomonadota|c__Betaproteobacteria|o__Neisseriales|f__Neisseriaceae|g__Stenoxybacter	LEfSe	I	0.152899	0.0143782	no
A - H - I	d__Bacteria|p__Pseudomonadota|c__Betaproteobacteria|o__Neisseriales|f__Neisseriaceae|g__Stenoxybacter|s__Stenoxybacter_acetivorans	LEfSe	I	0.152899	0.0143782	no
A - H - I	d__Bacteria|p__Pseudomonadota|c__Alphaproteobacteria|o__Kordiimonadales|f__Kordiimonadaceae|g__Kordiimonas|s__Kordiimonas_sp._SCSIO_12610	LEfSe	A	0.152265	0.0462291	no
A - H - I	d__Bacteria|p__Bacteroidota|c__Cytophagia|o__Cytophagales|f__Flectobacillaceae|g__Arcicella|s__Arcicella_rigui	LEfSe	H	0.151729	0.0485088	no
A - H - I	d__Bacteria|p__Pseudomonadota|c__Betaproteobacteria|o__Burkholderiales|f__Comamonadaceae|g__Giesbergeria	LEfSe	I	0.151613	0.0189411	no
A - H - I	d__Bacteria|p__Bacteroidota|c__Flavobacteriia|o__Flavobacteriales|f__Flavobacteriaceae|g__Flavobacterium|s__Flavobacterium_franklandianum	LEfSe	H	0.151545	0.0143782	no
A - H - I	d__Bacteria|p__Pseudomonadota|c__Alphaproteobacteria|o__Maricaulales|f__Maricaulaceae|g__Euryhalocaulis	LEfSe	A	0.151363	0.0195993	no
A - H - I	d__Bacteria|p__Candidatus_Anderseniibacteriota	LEfSe	A	0.151328	0.0292854	no
A - H - I	d__Bacteria|p__Candidatus_Anderseniibacteriota|c__Candidatus_Anderseniibacteriota_unclassified	LEfSe	A	0.151328	0.0292854	no
A - H - I	d__Bacteria|p__Candidatus_Anderseniibacteriota|c__Candidatus_Anderseniibacteriota_unclassified|o__Candidatus_Anderseniibacteriota_unclassified	LEfSe	A	0.151328	0.0292854	no
A - H - I	d__Bacteria|p__Candidatus_Anderseniibacteriota|c__Candidatus_Anderseniibacteriota_unclassified|o__Candidatus_Anderseniibacteriota_unclassified|f__Candidatus_Anderseniibacteriota_unclassified	LEfSe	A	0.151328	0.0292854	no
A - H - I	d__Bacteria|p__Candidatus_Anderseniibacteriota|c__Candidatus_Anderseniibacteriota_unclassified|o__Candidatus_Anderseniibacteriota_unclassified|f__Candidatus_Anderseniibacteriota_unclassified|g__Candidatus_Anderseniibacteriota_unclassified	LEfSe	A	0.151328	0.0292854	no
A - H - I	d__Bacteria|p__Pseudomonadota|c__Alphaproteobacteria|o__Maricaulales|f__Maricaulaceae|g__Euryhalocaulis|s__Euryhalocaulis_unclassified	LEfSe	A	0.151017	0.00663542	no
A - H - I	d__Bacteria|p__Chloroflexota|c__Anaerolineae|o__Anaerolineae_unclassified|f__Anaerolineae_unclassified|g__Anaerolineae_unclassified|s__Anaerolineae_bacterium_49_20	LEfSe	A	0.150823	0.0398887	no
A - H - I	d__Bacteria|p__Bacteroidota|c__Chitinophagia|o__Chitinophagales|f__Chitinophagaceae|g__Niastella|s__Niastella_yeongjuensis	LEfSe	A	0.150459	0.039297	no
A - H - I	d__Bacteria|p__Pseudomonadota|c__Alphaproteobacteria|o__Rhodospirillales|f__Rhodovibrionaceae|g__Limibacillus	LEfSe	A	0.15036	0.0386015	no
A - H - I	d__Bacteria|p__Pseudomonadota|c__Alphaproteobacteria|o__Hyphomonadales|f__Hyphomonadaceae|g__Hyphomonadaceae_unclassified	LEfSe	A	0.149561	0.0376031	no
A - H - I	d__Bacteria|p__Pseudomonadota|c__Alphaproteobacteria|o__Rhodospirillales|f__Rhodovibrionaceae|g__Limibacillus|s__Limibacillus_halophilus	LEfSe	A	0.149439	0.0190702	no
A - H - I	d__Bacteria|p__Bacillota|c__Bacilli|o__Lactobacillales|f__Enterococcaceae|g__Enterococcus|s__Enterococcus_sp._CU9D	LEfSe	H	0.149409	0.019999	no
A - H - I	d__Viruses|p__Uroviricota|c__Caudoviricetes|o__Crassvirales|f__Suoliviridae|g__Buchavirus|s__Buchavirus_oralis	LEfSe	I	0.149341	0.0354485	no
A - H - I	d__Bacteria|p__Bacillota|c__Bacilli|o__Bacillales|f__Bacillaceae|g__Siminovitchia|s__Siminovitchia_terrae	LEfSe	H	0.14915	0.0023853	no
A - H - I	d__Bacteria|p__Bacteroidota|c__Flavobacteriia|o__Flavobacteriales|f__Flavobacteriales_unclassified|g__Flavobacteriales_unclassified|s__Flavobacteriales_bacterium_CG_4_9_14_0_2_um_filter_32_27	LEfSe	A	0.148552	0.0404658	no
A - H - I	d__Bacteria|p__Pseudomonadota|c__Alphaproteobacteria|o__Rhodospirillales|f__Rhodospirillaceae|g__Ferrovibrio|s__uncultured_Ferrovibrio_sp.	LEfSe	A	0.147522	0.0135965	no
A - H - I	d__Bacteria|p__Bacteroidota|c__Flavobacteriia|o__Flavobacteriales|f__Flavobacteriaceae|g__Myroides|s__Myroides_unclassified	LEfSe	H	0.14743	0.0496809	no
A - H - I	d__Bacteria|p__Pseudomonadota|c__Alphaproteobacteria|o__Rhodospirillales|f__Azospirillaceae|g__Skermanella|s__Skermanella_aerolata	LEfSe	A	0.146662	0.0210056	no
A - H - I	d__Bacteria|p__Pseudomonadota|c__Alphaproteobacteria|o__Hyphomicrobiales|f__Parvibaculaceae|g__Pyruvatibacter	LEfSe	A	0.145888	0.0408208	no
A - H - I	d__Bacteria|p__Pseudomonadota|c__Alphaproteobacteria|o__Hyphomicrobiales|f__Parvibaculaceae|g__Pyruvatibacter|s__Pyruvatibacter_mobilis	LEfSe	A	0.145888	0.0408208	no
A - H - I	d__Bacteria|p__Chloroflexota|c__Anaerolineae|o__Anaerolineales|f__Anaerolineaceae|g__Bellilinea	LEfSe	H	0.145411	0.0424696	no
A - H - I	d__Bacteria|p__Candidatus_Anderseniibacteriota|c__Candidatus_Anderseniibacteriota_unclassified|o__Candidatus_Anderseniibacteriota_unclassified|f__Candidatus_Anderseniibacteriota_unclassified|g__Candidatus_Anderseniibacteriota_unclassified|s__Candidatus_Andersenbacteria_bacterium_RIFCSPHIGHO2_01_FULL_46_36	LEfSe	A	0.145137	0.0267164	no
A - H - I	d__Bacteria|p__Bacillota|c__Bacilli|o__Bacillales|f__Bacillaceae|g__Bacillus|s__Bacillus_sp._NTK071	LEfSe	H	0.144926	0.00584098	no
A - H - I	d__Bacteria|p__Bacteroidota|c__Cytophagia|o__Cytophagales|f__Cytophagaceae|g__Spirosoma|s__Spirosoma_arboris	LEfSe	A	0.144733	0.00657516	no
A - H - I	d__Bacteria|p__Bacteroidota|c__Chitinophagia|o__Chitinophagales|f__Chitinophagaceae|g__Pinibacter|s__Pinibacter_soli	LEfSe	H	0.143895	0.0286945	no
A - H - I	d__Bacteria|p__Candidatus_Buchananiibacteriota|c__Candidatus_Buchananiibacteriota_unclassified|o__Candidatus_Buchananiibacteriota_unclassified|f__Candidatus_Buchananiibacteriota_unclassified|g__Candidatus_Buchananiibacteriota_unclassified|s__Candidatus_Buchananbacteria_bacterium_CG10_big_fil_rev_8_21_14_0_10_42_9	LEfSe	H	0.143825	0.0345384	no
A - H - I	d__Bacteria|p__Bacillota|c__Negativicutes|o__Veillonellales|f__Veillonellaceae|g__Veillonella|s__Veillonella_sp._KGMB01456	LEfSe	I	0.143065	0.00174654	no
A - H - I	d__Bacteria|p__Bacteroidota|c__Sphingobacteriia|o__Sphingobacteriales|f__Sphingobacteriaceae|g__Mucilaginibacter|s__Mucilaginibacter_rivuli	LEfSe	I	0.142952	0.0145466	no
A - H - I	d__Bacteria|p__Chlorobiota|c__Chlorobiota_unclassified|o__Chlorobiota_unclassified|f__Chlorobiota_unclassified|g__Chlorobiota_unclassified|s__Chlorobi_bacterium_OLB7	LEfSe	I	0.142705	0.0204385	no
A - H - I	d__Bacteria|p__Pseudomonadota|c__Alphaproteobacteria|o__Hyphomicrobiales|f__Hyphomicrobiales_unclassified|g__Pseudorhodoplanes|s__Pseudorhodoplanes_sp.	LEfSe	A	0.142299	0.0398887	no
A - H - I	d__Bacteria|p__Cyanobacteriota|c__Cyanophyceae|o__Nostocales|f__Rivulariaceae	LEfSe	A	0.142267	0.0395726	no
A - H - I	d__Bacteria|p__Cyanobacteriota|c__Cyanophyceae|o__Nostocales|f__Rivulariaceae|g__Rivularia	LEfSe	A	0.142267	0.0395726	no
A - H - I	d__Bacteria|p__Pseudomonadota|c__Betaproteobacteria|o__Rhodocyclales|f__Zoogloeaceae|g__Zoogloea	LEfSe	H	0.142231	0.0403247	no
A - H - I	d__Bacteria|p__Bacteroidota|c__Sphingobacteriia|o__Sphingobacteriales|f__Sphingobacteriaceae|g__Mucilaginibacter|s__Mucilaginibacter_pineti	LEfSe	A	0.142063	0.00403945	no
A - H - I	d__Viruses|p__Uroviricota|c__Caudoviricetes|o__Caudoviricetes_unclassified|f__Caudoviricetes_unclassified|g__Caudoviricetes_unclassified|s__Myoviridae_sp._ctZDd15	LEfSe	I	0.141128	0.0107047	no
A - H - I	d__Bacteria|p__Thermodesulfobacteriota|c__Desulfuromonadia|o__Desulfuromonadales|f__Desulfuromonadaceae|g__Desulfuromonas|s__Desulfuromonas_acetexigens	LEfSe	H	0.140706	0.0176799	no
A - H - I	d__Bacteria|p__Bacteroidota|c__Flavobacteriia|o__Flavobacteriales|f__Flavobacteriaceae|g__Ulvibacter	LEfSe	A	0.140496	0.0464359	no
A - H - I	d__Bacteria|p__Bacteroidota|c__Cytophagia|o__Cytophagales|f__Flectobacillaceae|g__Arcicella|s__Arcicella_gelida	LEfSe	A	0.140333	0.037472	no
A - H - I	d__Bacteria|p__Bacillota|c__Bacilli|o__Bacillales|f__Bacillales_unclassified|g__Bacillales_unclassified	LEfSe	I	0.140286	0.00274037	no
A - H - I	d__Bacteria|p__Pseudomonadota|c__Alphaproteobacteria|o__Hyphomicrobiales|f__Rhizobiaceae|g__Rhizobium|s__Rhizobium_sp._NRK18	LEfSe	A	0.139756	0.0345787	no
A - H - I	d__Bacteria|p__Bacteroidota|c__Saprospiria|o__Saprospirales|f__Saprospiraceae|g__Membranihabitans|s__Membranihabitans_maritimus	LEfSe	A	0.139749	0.0334823	no
A - H - I	d__Bacteria|p__Bacteroidota|c__Flavobacteriia|o__Flavobacteriales|f__Flavobacteriaceae|g__Polaribacter|s__Polaribacter_litorisediminis	LEfSe	A	0.139441	0.0386015	no
A - H - I	d__Bacteria|p__Bacteroidota|c__Cytophagia|o__Cytophagales|f__Cytophagaceae|g__Spirosoma|s__uncultured_Spirosoma_sp.	LEfSe	H	0.139298	0.0160292	no
A - H - I	d__Bacteria|p__Pseudomonadota|c__Alphaproteobacteria|o__Sneathiellales|f__Sneathiellaceae|g__Sneathiella|s__Sneathiella_aquimaris	LEfSe	A	0.13927	0.0464359	no
A - H - I	d__Bacteria|p__Bacteroidota|c__Cytophagia|o__Cytophagales|f__Fulvivirgaceae|g__Fulvivirga|s__Fulvivirga_maritima	LEfSe	A	0.139046	0.0313014	no
A - H - I	d__Bacteria|p__Candidatus_Wolfebacteria|c__Candidatus_Wolfebacteria_unclassified|o__Candidatus_Wolfebacteria_unclassified	LEfSe	A	0.139002	0.0338022	no
A - H - I	d__Bacteria|p__Candidatus_Wolfebacteria|c__Candidatus_Wolfebacteria_unclassified|o__Candidatus_Wolfebacteria_unclassified|f__Candidatus_Wolfebacteria_unclassified	LEfSe	A	0.139002	0.0338022	no
A - H - I	d__Bacteria|p__Candidatus_Wolfebacteria|c__Candidatus_Wolfebacteria_unclassified|o__Candidatus_Wolfebacteria_unclassified|f__Candidatus_Wolfebacteria_unclassified|g__Candidatus_Wolfebacteria_unclassified	LEfSe	A	0.139002	0.0338022	no
A - H - I	d__Bacteria|p__Candidatus_Wolfebacteria	LEfSe	A	0.139002	0.0338022	no
A - H - I	d__Bacteria|p__Candidatus_Wolfebacteria|c__Candidatus_Wolfebacteria_unclassified	LEfSe	A	0.139002	0.0338022	no
A - H - I	d__Viruses|p__Uroviricota|c__Caudoviricetes|o__Caudoviricetes_unclassified|f__Caudoviricetes_unclassified|g__Caudoviricetes_unclassified|s__Siphoviridae_sp._ctM4P7	LEfSe	I	0.138572	0.0386915	no
A - H - I	d__Bacteria|p__Fibrobacterota|c__Fibrobacterota_unclassified	LEfSe	A	0.138431	0.0334693	no
A - H - I	d__Bacteria|p__Fibrobacterota|c__Fibrobacterota_unclassified|o__Fibrobacterota_unclassified	LEfSe	A	0.138431	0.0334693	no
A - H - I	d__Bacteria|p__Fibrobacterota|c__Fibrobacterota_unclassified|o__Fibrobacterota_unclassified|f__Fibrobacterota_unclassified	LEfSe	A	0.138431	0.0334693	no
A - H - I	d__Bacteria|p__Fibrobacterota|c__Fibrobacterota_unclassified|o__Fibrobacterota_unclassified|f__Fibrobacterota_unclassified|g__Fibrobacterota_unclassified	LEfSe	A	0.138431	0.0334693	no
A - H - I	d__Bacteria|p__Bacteroidota|c__Flavobacteriia|o__Flavobacteriales|f__Flavobacteriaceae|g__Flavobacterium|s__Flavobacterium_xueshanense	LEfSe	A	0.137619	0.0223473	no
A - H - I	d__Bacteria|p__Bacillota|c__Bacilli|o__Bacillales|f__Bacillaceae|g__Alkalihalobacillus|s__Alkalihalobacillus_trypoxylicola	LEfSe	A	0.136834	0.0241562	no
A - H - I	d__Bacteria|p__Chlorobiota|c__Chlorobiia|o__Chlorobiales|f__Chlorobiaceae|g__Prosthecochloris|s__Prosthecochloris_sp.	LEfSe	I	0.13677	0.0474104	no
A - H - I	d__Archaea|p__Euryarchaeota|c__Candidatus_Nanohaloarchaea|o__Candidatus_Nanohaloarchaea_unclassified|f__Candidatus_Nanohaloarchaea_unclassified|g__Candidatus_Nanohaloarchaea_unclassified|s__Nanohaloarchaea_archaeon_SW_7_46_7	LEfSe	I	0.136085	0.0153097	no
A - H - I	d__Bacteria|p__Actinomycetota|c__Actinomycetes|o__Bifidobacteriales|f__Bifidobacteriaceae|g__Bifidobacterium|s__Bifidobacterium_lemurum	LEfSe	H	0.136034	0.0478542	no
A - H - I	d__Bacteria|p__Pseudomonadota|c__Alphaproteobacteria|o__Sphingomonadales|f__Sphingomonadaceae|g__Sphingomonas|s__Sphingomonas_segetis	LEfSe	A	0.135946	0.0291889	no
A - H - I	d__Bacteria|p__Bacteroidota|c__Flavobacteriia|o__Flavobacteriales|f__Weeksellaceae|g__Empedobacter|s__Empedobacter_sp.	LEfSe	A	0.135609	0.0223604	no
A - H - I	d__Bacteria|p__Bacteroidota|c__Flavobacteriia|o__Flavobacteriales|f__Flavobacteriaceae|g__Flavobacterium|s__Flavobacterium_microcysteis	LEfSe	A	0.135207	0.00231595	no
A - H - I	d__Bacteria|p__Bacillota|c__Bacilli|o__Bacillales|f__Listeriaceae|g__Listeria|s__Listeria_cossartiae	LEfSe	H	0.134231	0.0203317	no
A - H - I	d__Bacteria|p__Bacillota|c__Bacilli|o__Bacillales|f__Bacillaceae|g__Ornithinibacillus|s__Ornithinibacillus_halophilus	LEfSe	H	0.13417	0.022209	no
A - H - I	d__Bacteria|p__Pseudomonadota|c__Alphaproteobacteria|o__Sphingomonadales|f__Sphingomonadaceae|g__Sphingomonas|s__Sphingomonas_gilva	LEfSe	I	0.133674	0.0483115	no
A - H - I	d__Bacteria|p__Thermodesulfobacteriota|c__Desulfobulbia|o__Desulfobulbales|f__Desulfobulbaceae|g__Desulfobulbus|s__Desulfobulbus_rhabdoformis	LEfSe	H	0.133466	0.0253228	no
A - H - I	d__Bacteria|p__Campylobacterota|c__Epsilonproteobacteria|o__Campylobacterales|f__Helicobacteraceae|g__Helicobacter|s__Helicobacter_sp._15-1451	LEfSe	A	0.133046	0.0348617	no
A - H - I	d__Bacteria|p__Bacillota|c__Bacilli|o__Bacillales|f__Bacillaceae|g__Allobacillus|s__Allobacillus_salarius	LEfSe	I	0.13258	0.0388646	no
A - H - I	d__Bacteria|p__Bacteroidota|c__Chitinophagia|o__Chitinophagales|f__Chitinophagaceae|g__Taibaiella|s__Taibaiella_lutea	LEfSe	A	0.132252	0.0382732	no
A - H - I	d__Bacteria|p__Bacteroidota|c__Flavobacteriia|o__Flavobacteriales|f__Flavobacteriaceae|g__Croceitalea	LEfSe	H	0.132116	0.0395726	no
A - H - I	d__Bacteria|p__Pseudomonadota|c__Betaproteobacteria|o__Burkholderiales|f__Comamonadaceae|g__Giesbergeria|s__Giesbergeria_anulus	LEfSe	I	0.13204	0.0252688	no
A - H - I	d__Bacteria|p__Pseudomonadota|c__Alphaproteobacteria|o__Hyphomicrobiales|f__Bartonellaceae|g__Bartonella|s__Bartonella_grahamii	LEfSe	A	0.131643	0.00877516	no
A - H - I	d__Bacteria|p__Bacillota|c__Bacilli|o__Bacillales|f__Paenibacillaceae|g__Paenibacillus|s__Paenibacillus_sp._O199	LEfSe	A	0.131207	0.0212599	no
A - H - I	d__Bacteria|p__Pseudomonadota|c__Alphaproteobacteria|o__Rhodospirillales|f__Rhodospirillaceae|g__Magnetospirillum|s__Magnetospirillum_sp.	LEfSe	A	0.131122	0.0492967	no
A - H - I	d__Bacteria|p__Bacteroidota|c__Flavobacteriia|o__Flavobacteriales|f__Weeksellaceae|g__Empedobacter|s__Empedobacter_sedimenti	LEfSe	A	0.131003	0.0104481	no
A - H - I	d__Bacteria|p__Candidatus_Methylomirabilota|c__Candidatus_Methylomirabilota_unclassified	LEfSe	H	0.130875	0.0329728	no
A - H - I	d__Bacteria|p__Candidatus_Methylomirabilota|c__Candidatus_Methylomirabilota_unclassified|o__Candidatus_Methylomirabilota_unclassified	LEfSe	H	0.130875	0.0329728	no
A - H - I	d__Bacteria|p__Candidatus_Methylomirabilota|c__Candidatus_Methylomirabilota_unclassified|o__Candidatus_Methylomirabilota_unclassified|f__Candidatus_Methylomirabilota_unclassified	LEfSe	H	0.130875	0.0329728	no
A - H - I	d__Bacteria|p__Candidatus_Methylomirabilota|c__Candidatus_Methylomirabilota_unclassified|o__Candidatus_Methylomirabilota_unclassified|f__Candidatus_Methylomirabilota_unclassified|g__Candidatus_Methylomirabilota_unclassified	LEfSe	H	0.130875	0.0329728	no
A - H - I	d__Bacteria|p__Bacteroidota|c__Cytophagia|o__Cytophagales|f__Reichenbachiellaceae|g__Reichenbachiella|s__Reichenbachiella_sp.	LEfSe	H	0.129499	0.00566787	no
A - H - I	d__Bacteria|p__Pseudomonadota|c__Alphaproteobacteria|o__Hyphomicrobiales|f__Xanthobacteraceae|g__Xanthobacteraceae_unclassified	LEfSe	A	0.129458	0.00271446	no
A - H - I	d__Bacteria|p__Pseudomonadota|c__Alphaproteobacteria|o__Hyphomicrobiales|f__Xanthobacteraceae|g__Xanthobacteraceae_unclassified|s__Xanthobacteraceae_bacterium	LEfSe	A	0.129458	0.00271446	no
A - H - I	d__Bacteria|p__Ignavibacteriota|c__Ignavibacteria|o__Ignavibacteriales|f__Melioribacteraceae|g__Stygiobacter|s__Stygiobacter_sp._GWC2_38_9	LEfSe	A	0.129023	0.0103472	no
A - H - I	d__Bacteria|p__Bacteroidota|c__Flavobacteriia|o__Flavobacteriales|f__Flavobacteriaceae|g__Myroides|s__Myroides_sp._JBRI-B21084	LEfSe	I	0.128724	0.0212599	no
A - H - I	d__Bacteria|p__Bdellovibrionota|c__Oligoflexia|o__Silvanigrellales|f__Silvanigrellales_unclassified	LEfSe	H	0.128195	0.0198338	no
A - H - I	d__Bacteria|p__Bdellovibrionota|c__Oligoflexia|o__Silvanigrellales|f__Silvanigrellales_unclassified|g__Spirobacillus	LEfSe	H	0.128195	0.0198338	no
A - H - I	d__Bacteria|p__Bdellovibrionota|c__Oligoflexia|o__Silvanigrellales|f__Silvanigrellales_unclassified|g__Spirobacillus|s__Spirobacillus_cienkowskii	LEfSe	H	0.128195	0.0198338	no
A - H - I	d__Bacteria|p__Pseudomonadota|c__Gammaproteobacteria|o__Enterobacterales|f__Enterobacteriaceae|g__Raoultella|s__Raoultella_ornithinolytica	LEfSe	H	0.128147	0.0440394	no
A - H - I	d__Bacteria|p__Actinomycetota|c__Actinomycetes|o__Micrococcales|f__Microbacteriaceae|g__Leifsonia|s__Leifsonia_xyli	LEfSe	H	0.128114	0.0248554	no
A - H - I	d__Bacteria|p__Bacteroidota|c__Flavobacteriia|o__Flavobacteriales|f__Flavobacteriaceae|g__Sinomicrobium|s__Sinomicrobium_sp._N-1-3-6	LEfSe	I	0.127894	0.0317419	no
A - H - I	d__Bacteria|p__Elusimicrobiota|c__Elusimicrobiota_unclassified|o__Elusimicrobiota_unclassified|f__Elusimicrobiota_unclassified|g__Elusimicrobiota_unclassified|s__Elusimicrobia_bacterium_RIFOXYA2_FULL_40_6	LEfSe	H	0.127804	0.018462	no
A - H - I	d__Bacteria|p__Cyanobacteriota|c__Cyanophyceae|o__Leptolyngbyales|f__Leptolyngbyaceae|g__Leptolyngbya|s__Leptolyngbya_unclassified	LEfSe	A	0.127538	0.0419778	no
A - H - I	d__Bacteria|p__Bacteroidota|c__Cytophagia|o__Cytophagales|f__Reichenbachiellaceae|g__Reichenbachiella|s__Reichenbachiella_versicolor	LEfSe	A	0.127371	0.0103935	no
A - H - I	d__Archaea|p__Euryarchaeota|c__Candidatus_Methanofastidiosia	LEfSe	H	0.127063	0.0486408	no
A - H - I	d__Archaea|p__Euryarchaeota|c__Candidatus_Methanofastidiosia|o__Candidatus_Methanofastidiosales	LEfSe	H	0.127063	0.0486408	no
A - H - I	d__Archaea|p__Euryarchaeota|c__Candidatus_Methanofastidiosia|o__Candidatus_Methanofastidiosales|f__Candidatus_Methanofastidiosaceae	LEfSe	H	0.127063	0.0486408	no
A - H - I	d__Archaea|p__Euryarchaeota|c__Candidatus_Methanofastidiosia|o__Candidatus_Methanofastidiosales|f__Candidatus_Methanofastidiosaceae|g__Candidatus_Methanofastidiosum	LEfSe	H	0.127063	0.0486408	no
A - H - I	d__Archaea|p__Euryarchaeota|c__Candidatus_Methanofastidiosia|o__Candidatus_Methanofastidiosales|f__Candidatus_Methanofastidiosaceae|g__Candidatus_Methanofastidiosum|s__Candidatus_Methanofastidiosum_methylothiophilum	LEfSe	H	0.127063	0.0486408	no
A - H - I	d__Bacteria|p__Bacillota|c__Clostridia|o__Lachnospirales|f__Lachnospiraceae|g__Diplocloster|s__Diplocloster_hominis	LEfSe	H	0.127012	0.0203317	no
A - H - I	d__Bacteria|p__Pseudomonadota|c__Gammaproteobacteria|o__Alteromonadales|f__Colwelliaceae|g__Thalassotalea	LEfSe	H	0.126999	0.049498	no
A - H - I	d__Bacteria|p__Bacteroidota|c__Sphingobacteriia|o__Sphingobacteriales|f__Sphingobacteriaceae|g__Hufsiella|s__Hufsiella_arboris	LEfSe	A	0.126804	0.045235	no
A - H - I	d__Bacteria|p__Bacillota|c__Bacilli|o__Bacillales|f__Bacillaceae|g__Mesobacillus|s__Mesobacillus_persicus	LEfSe	I	0.12671	0.00653445	no
A - H - I	d__Bacteria|p__Bacillota|c__Bacilli|o__Bacillales|f__Paenibacillaceae|g__Saccharibacillus|s__Saccharibacillus_sacchari	LEfSe	A	0.126357	0.0303502	no
A - H - I	d__Bacteria|p__Pseudomonadota|c__Gammaproteobacteria|o__Thiotrichales|f__Thiotrichaceae|g__Thiomargarita	LEfSe	I	0.126223	0.00440045	no
A - H - I	d__Bacteria|p__Pseudomonadota|c__Gammaproteobacteria|o__Thiotrichales|f__Thiotrichaceae|g__Thiomargarita|s__Candidatus_Thiomargarita_nelsonii	LEfSe	I	0.126223	0.00440045	no
A - H - I	d__Bacteria|p__Bacteroidota|c__Flavobacteriia|o__Flavobacteriales|f__Flavobacteriaceae|g__Aquimarina|s__Aquimarina_sp._AD1	LEfSe	A	0.125904	0.015264	no
A - H - I	d__Bacteria|p__Bacteroidota|c__Flavobacteriia|o__Flavobacteriales|f__Flavobacteriaceae|g__Capnocytophaga|s__Capnocytophaga_felis	LEfSe	H	0.125786	0.0306819	no
A - H - I	d__Bacteria|p__Bacillota|c__Bacillota_unclassified|o__Bacillota_unclassified|f__Bacillota_unclassified|g__Bacillota_unclassified|s__Firmicutes_bacterium_HGW-Firmicutes-18	LEfSe	A	0.125527	0.000673261	no
A - H - I	d__Bacteria|p__Actinomycetota|c__Actinomycetes|o__Bifidobacteriales|f__Bifidobacteriaceae|g__Bifidobacterium|s__Bifidobacterium_aerophilum	LEfSe	H	0.125073	0.0398268	no
A - H - I	d__Bacteria|p__Balneolota|c__Balneolia|o__Balneolales|f__Balneolaceae|g__Rhodohalobacter|s__Rhodohalobacter_mucosus	LEfSe	H	0.12487	0.0177625	no
A - H - I	d__Bacteria|p__Bacteroidota|c__Sphingobacteriia|o__Sphingobacteriales|f__Sphingobacteriaceae|g__Mucilaginibacter|s__Mucilaginibacter_pocheonensis	LEfSe	A	0.124745	0.0253228	no
A - H - I	d__Bacteria|p__Bacteroidota|c__Flavobacteriia|o__Flavobacteriales|f__Flavobacteriaceae|g__Winogradskyella|s__Winogradskyella_eximia	LEfSe	A	0.124487	0.0419778	no
A - H - I	d__Bacteria|p__Bacillota|c__Bacilli|o__Bacillales|f__Listeriaceae|g__Listeria|s__Listeria_grayi	LEfSe	H	0.124132	0.0354898	no
A - H - I	d__Archaea|p__Euryarchaeota|c__Candidatus_Methanoliparia|o__Candidatus_Methanoliparales|f__Candidatus_Methanollivieraceae|g__Candidatus_Methanollivieraceae_unclassified	LEfSe	H	0.124116	0.0160043	no
A - H - I	d__Bacteria|p__Pseudomonadota|c__Alphaproteobacteria|o__Rhodospirillales|f__Rhodospirillales_unclassified|g__Rhodospirillales_unclassified|s__Rhodospirillales_bacterium_TMPK1	LEfSe	A	0.123789	0.0216094	no
A - H - I	d__Bacteria|p__Bacillota|c__Bacilli|o__Bacillales|f__Bacillaceae|g__Bacillus|s__Bacillus_sp._C1-1	LEfSe	I	0.123468	0.0229655	no
A - H - I	d__Bacteria|p__Pseudomonadota|c__Gammaproteobacteria|o__Oceanospirillales|f__Oceanospirillaceae|g__Marinomonas|s__Marinomonas_pollencensis	LEfSe	I	0.123267	0.0329928	no
A - H - I	d__Bacteria|p__Bacillota|c__Clostridia|o__Lachnospirales|f__Lachnospiraceae|g__Coprococcus|s__Coprococcus_sp._AF38-1	LEfSe	I	0.122711	0.0130484	no
A - H - I	d__Bacteria|p__Bacteroidota|c__Flavobacteriia|o__Flavobacteriales|f__Flavobacteriaceae|g__Flagellimonas|s__Flagellimonas_marinaquae	LEfSe	A	0.122627	0.0467979	no
A - H - I	d__Bacteria|p__Bacillota|c__Bacilli|o__Bacillales|f__Bacillaceae|g__Cytobacillus|s__Cytobacillus_spongiae	LEfSe	A	0.122396	0.015343	no
A - H - I	d__Bacteria|p__Chloroflexota|c__Anaerolineae|o__Anaerolineales|f__Anaerolineaceae|g__Anaerolineaceae_unclassified|s__Anaerolineaceae_bacterium_46_22	LEfSe	H	0.122348	0.0462919	no
A - H - I	d__Bacteria|p__Pseudomonadota|c__Betaproteobacteria|o__Burkholderiales|f__Comamonadaceae|g__Ramlibacter|s__Ramlibacter_ginsenosidimutans	LEfSe	A	0.12234	0.0159016	no
A - H - I	d__Bacteria|p__Bacillota|c__Bacilli|o__Bacillales|f__Bacillaceae|g__Lysinibacillus|s__Lysinibacillus_mangiferihumi	LEfSe	I	0.121776	0.0317419	no
A - H - I	d__Bacteria|p__Bacteroidota|c__Sphingobacteriia|o__Sphingobacteriales|f__Sphingobacteriaceae|g__Mucilaginibacter|s__Mucilaginibacter_frigoritolerans	LEfSe	A	0.121561	0.0454738	no
A - H - I	d__Bacteria|p__Bacillota|c__Bacilli|o__Bacillales|f__Planococcaceae|g__Jeotgalibacillus|s__Jeotgalibacillus_sp._S-D1	LEfSe	I	0.121248	0.0453316	no
A - H - I	d__Bacteria|p__Pseudomonadota|c__Gammaproteobacteria|o__Alteromonadales|f__Pseudoalteromonadaceae|g__Psychrosphaera	LEfSe	A	0.120586	0.0248554	no
A - H - I	d__Bacteria|p__Pseudomonadota|c__Gammaproteobacteria|o__Oceanospirillales|f__Halomonadaceae|g__Halomonas|s__Halomonas_elongata	LEfSe	I	0.120418	0.0243642	no
A - H - I	d__Bacteria|p__Thermotogota|c__Thermotogae|o__Thermotogales|f__Thermotogaceae|g__Pseudothermotoga|s__Pseudothermotoga_thermarum	LEfSe	A	0.120224	0.025545	no
A - H - I	d__Bacteria|p__Cyanobacteriota|c__Cyanophyceae|o__Oscillatoriales|f__Sirenicapillariaceae	LEfSe	A	0.120009	0.0101207	no
A - H - I	d__Viruses|p__Uroviricota|c__Caudoviricetes|o__Caudoviricetes_unclassified|f__Salasmaviridae|g__Beecentumtrevirus	LEfSe	A	0.120001	0.0324848	no
A - H - I	d__Viruses|p__Uroviricota|c__Caudoviricetes|o__Crassvirales|f__Intestiviridae|g__Carjivirus	LEfSe	A	0.119866	0.0294847	no
A - H - I	d__Viruses|p__Uroviricota|c__Caudoviricetes|o__Crassvirales|f__Intestiviridae|g__Carjivirus|s__CrAssphage_sp._C0531BW4	LEfSe	A	0.119866	0.0294847	no
A - H - I	d__Bacteria|p__Pseudomonadota|c__Alphaproteobacteria|o__Hyphomicrobiales|f__Phyllobacteriaceae|g__Aliihoeflea	LEfSe	A	0.119677	0.0103472	no
A - H - I	d__Bacteria|p__Bacteroidota|c__Flavobacteriia|o__Flavobacteriales|f__Flavobacteriaceae|g__Leptobacterium	LEfSe	I	0.11892	0.0175943	no
A - H - I	d__Bacteria|p__Bacteroidota|c__Flavobacteriia|o__Flavobacteriales|f__Flavobacteriaceae|g__Leptobacterium|s__Leptobacterium_flavescens	LEfSe	I	0.11892	0.0175943	no
A - H - I	d__Bacteria|p__Pseudomonadota|c__Alphaproteobacteria|o__Sphingomonadales|f__Erythrobacteraceae|g__Qipengyuania|s__Qipengyuania_flava	LEfSe	I	0.118573	0.0367588	no
A - H - I	d__Bacteria|p__Pseudomonadota|c__Gammaproteobacteria|o__Cellvibrionales|f__Cellvibrionaceae|g__Teredinibacter	LEfSe	H	0.118347	0.0190259	no
A - H - I	d__Bacteria|p__Bacteroidota|c__Flavobacteriia|o__Flavobacteriales|f__Flavobacteriaceae|g__Flavobacterium|s__Flavobacterium_sp._ZT3R18	LEfSe	H	0.118147	0.00917263	no
A - H - I	d__Bacteria|p__Bacteroidota|c__Cytophagia|o__Cytophagales|f__Spirosomataceae|g__Dyadobacter|s__Dyadobacter_luticola	LEfSe	I	0.118044	0.0350109	no
A - H - I	d__Bacteria|p__Bacteroidota|c__Flavobacteriia|o__Flavobacteriales|f__Cryomorphaceae|g__Cryomorphaceae_unclassified|s__Cryomorphaceae_bacterium_BACL7_MAG-120910-bin2	LEfSe	A	0.117396	0.0247463	no
A - H - I	d__Bacteria|p__Bacillota|c__Tissierellia|o__Tissierellales|f__Peptoniphilaceae|g__Parvimonas|s__Parvimonas_sp._KA00067	LEfSe	A	0.117388	0.0463729	no
A - H - I	d__Bacteria|p__Pseudomonadota|c__Alphaproteobacteria|o__Rhodospirillales|f__Rhodospirillaceae|g__Magnetospirillum|s__Magnetospirillum_fulvum	LEfSe	A	0.116845	0.0319149	no
A - H - I	d__Bacteria|p__Bacteroidota|c__Flavobacteriia|o__Flavobacteriales|f__Flavobacteriaceae|g__Flavobacterium|s__Flavobacterium_sp._GSB-24	LEfSe	I	0.116836	0.00423343	no
A - H - I	d__Bacteria|p__Bacteroidota|c__Cytophagia|o__Cytophagales|f__Flammeovirgaceae|g__Flammeovirga|s__Flammeovirga_agarivorans	LEfSe	H	0.116059	0.0496423	no
A - H - I	d__Bacteria|p__Bacteroidota|c__Chitinophagia|o__Chitinophagales|f__Chitinophagaceae|g__Taibaiella|s__Taibaiella_helva	LEfSe	A	0.115928	0.0386015	no
A - H - I	d__Bacteria|p__Bacillota|c__Bacilli|o__Bacillales|f__Bacillaceae|g__Lysinibacillus|s__Lysinibacillus_endophyticus	LEfSe	H	0.115888	0.0386615	no
A - H - I	d__Bacteria|p__Pseudomonadota|c__Alphaproteobacteria|o__Hyphomicrobiales|f__Rhodoblastaceae|g__Rhodoblastus|s__uncultured_Rhodoblastus_sp.	LEfSe	A	0.115848	0.0388722	no
A - H - I	d__Bacteria|p__Pseudomonadota|c__Betaproteobacteria|o__Rhodocyclales|f__Rhodocyclaceae|g__Propionivibrio|s__Propionivibrio_soli	LEfSe	A	0.11556	0.00546901	no
A - H - I	d__Bacteria|p__Bacteroidota|c__Sphingobacteriia|o__Sphingobacteriales|f__Sphingobacteriaceae|g__Mucilaginibacter|s__Mucilaginibacter_dorajii	LEfSe	H	0.115176	0.0465421	no
A - H - I	d__Bacteria|p__Pseudomonadota|c__Gammaproteobacteria|o__Lysobacterales|f__Lysobacteraceae|g__Lysobacter|s__Lysobacter_spongiicola	LEfSe	H	0.114832	0.0145841	no
A - H - I	d__Viruses|p__Uroviricota|c__Caudoviricetes|o__Caudoviricetes_unclassified|f__Caudoviricetes_unclassified|g__Caudoviricetes_unclassified|s__Myoviridae_sp._ctfA14	LEfSe	I	0.114826	0.00402871	no
A - H - I	d__Bacteria|p__Pseudomonadota|c__Alphaproteobacteria|o__Hyphomicrobiales|f__Pleomorphomonadaceae|g__Chthonobacter	LEfSe	A	0.114794	0.0280775	no
A - H - I	d__Bacteria|p__Pseudomonadota|c__Alphaproteobacteria|o__Rhodospirillales|f__Acetobacteraceae|g__Acidisoma	LEfSe	A	0.113964	0.0428421	no
A - H - I	d__Bacteria|p__Pseudomonadota|c__Alphaproteobacteria|o__Rhodospirillales|f__Thalassobaculaceae|g__Thalassobaculum|s__Thalassobaculum_fulvum	LEfSe	A	0.11392	0.0300629	no
A - H - I	d__Bacteria|p__Fusobacteriota|c__Fusobacteriia|o__Fusobacteriales|f__Leptotrichiaceae|g__Caviibacter	LEfSe	A	0.113701	0.0129173	no
A - H - I	d__Bacteria|p__Fusobacteriota|c__Fusobacteriia|o__Fusobacteriales|f__Leptotrichiaceae|g__Caviibacter|s__Caviibacter_abscessus	LEfSe	A	0.113701	0.0129173	no
A - H - I	d__Bacteria|p__Pseudomonadota|c__Betaproteobacteria|o__Nitrosomonadales|f__Methylophilaceae|g__Methylophilus|s__Methylophilus_sp._14	LEfSe	A	0.113021	0.0356279	no
A - H - I	d__Bacteria|p__Pseudomonadota|c__Alphaproteobacteria|o__Rhodospirillales|f__Rhodospirillaceae|g__Denitrobaculum	LEfSe	A	0.112986	0.0174583	no
A - H - I	d__Bacteria|p__Pseudomonadota|c__Alphaproteobacteria|o__Rhodospirillales|f__Rhodospirillaceae|g__Denitrobaculum|s__Denitrobaculum_tricleocarpae	LEfSe	A	0.112986	0.0174583	no
A - H - I	d__Bacteria|p__Pseudomonadota|c__Alphaproteobacteria|o__Maricaulales|f__Maricaulaceae|g__Hyphobacterium|s__Hyphobacterium_lacteum	LEfSe	A	0.112835	0.0455433	no
A - H - I	d__Bacteria|p__Bacteroidota|c__Cytophagia|o__Cytophagales|f__Cyclobacteriaceae|g__Algoriphagus|s__Algoriphagus_alkaliphilus	LEfSe	H	0.112552	0.0324395	no
A - H - I	d__Bacteria|p__Chloroflexota|c__Anaerolineae|o__Anaerolineales|f__Anaerolineaceae|g__Bellilinea|s__Bellilinea_sp.	LEfSe	H	0.112339	0.0089802	no
A - H - I	d__Bacteria|p__Mycoplasmatota|c__Mycoplasmatota_unclassified|o__Mycoplasmoidales|f__Metamycoplasmataceae|g__Mycoplasmopsis|s__Mycoplasmopsis_mucosicanis	LEfSe	A	0.112273	0.0262218	no
A - H - I	d__Bacteria|p__Bacillota|c__Clostridia|o__Peptostreptococcales|f__Thermotaleaceae|g__Geosporobacter|s__Geosporobacter_unclassified	LEfSe	I	0.112049	0.0155824	no
A - H - I	d__Bacteria|p__Bacteroidota|c__Bacteroidota_unclassified|o__Bacteroidota_unclassified|f__Bacteroidota_unclassified|g__Bacteroidota_unclassified|s__Bacteroidetes_bacterium_RBG_19FT_COMBO_42_7	LEfSe	A	0.111717	0.0468251	no
A - H - I	d__Bacteria|p__Bacteroidota|c__Sphingobacteriia|o__Sphingobacteriales|f__Sphingobacteriaceae|g__Pedobacter|s__Pedobacter_psychrotolerans	LEfSe	A	0.111635	0.0238348	no
A - H - I	d__Bacteria|p__Bacteroidota|c__Cytophagia|o__Cytophagales|f__Hymenobacteraceae|g__Pontibacter|s__Pontibacter_sp._Tf4	LEfSe	H	0.111351	0.0111609	no
A - H - I	d__Bacteria|p__Bacillota|c__Bacilli|o__Bacillales|f__Bacillaceae|g__Bacillus|s__Bacillus_sp._CGMCC_1.16541	LEfSe	A	0.111244	0.014479	no
A - H - I	d__Bacteria|p__Pseudomonadota|c__Betaproteobacteria|o__Nitrosomonadales|f__Sterolibacteriaceae|g__Georgfuchsia	LEfSe	A	0.111179	0.0468251	no
A - H - I	d__Bacteria|p__Pseudomonadota|c__Betaproteobacteria|o__Nitrosomonadales|f__Sterolibacteriaceae|g__Georgfuchsia|s__Georgfuchsia_toluolica	LEfSe	A	0.111179	0.0468251	no
A - H - I	d__Bacteria|p__Bacillota|c__Bacilli|o__Bacillales|f__Alicyclobacillaceae|g__Alicyclobacillus|s__Alicyclobacillus_ferrooxydans	LEfSe	A	0.110885	0.0207785	no
A - H - I	d__Bacteria|p__Bacillota|c__Bacilli|o__Bacillales|f__Paenibacillaceae|g__Paenibacillus|s__Paenibacillus_sp._EKM202P	LEfSe	A	0.110839	0.0143518	no
A - H - I	d__Bacteria|p__Pseudomonadota|c__Alphaproteobacteria|o__Sphingomonadales|f__Erythrobacteraceae|g__Erythrobacter|s__Erythrobacter_cryptus	LEfSe	A	0.110537	0.0355174	no
A - H - I	d__Bacteria|p__Bacteroidota|c__Flavobacteriia|o__Flavobacteriales|f__Weeksellaceae|g__Kaistella|s__Kaistella_faecalis	LEfSe	I	0.110521	0.00669883	no
A - H - I	d__Bacteria|p__Bacteroidota|c__Cytophagia|o__Cytophagales|f__Leadbetterellaceae|g__Emticicia|s__Emticicia_aquatica	LEfSe	A	0.110201	0.0214256	no
A - H - I	d__Bacteria|p__Bacillota|c__Bacilli|o__Bacillales|f__Bacillales_unclassified|g__Bacillales_unclassified|s__[Flavobacterium]_thermophilum	LEfSe	I	0.109926	0.0147206	no
A - H - I	d__Bacteria|p__Pseudomonadota|c__Gammaproteobacteria|o__Moraxellales|f__Moraxellaceae|g__Psychrobacter|s__Psychrobacter_immobilis	LEfSe	A	0.109821	0.0375003	no
A - H - I	d__Bacteria|p__Spirochaetota|c__Spirochaetia|o__Leptospirales|f__Leptospiraceae|g__Leptospira|s__Leptospira_ellinghausenii	LEfSe	H	0.109725	0.046515	no
A - H - I	d__Bacteria|p__Bacteroidota|c__Chitinophagia|o__Chitinophagales|f__Chitinophagaceae|g__Chitinophaga|s__Chitinophaga_skermanii	LEfSe	A	0.109571	0.0118968	no
A - H - I	d__Bacteria|p__Cyanobacteriota|c__Cyanophyceae|o__Oscillatoriales|f__Sirenicapillariaceae|g__Limnoraphis	LEfSe	A	0.109563	0.00107108	no
A - H - I	d__Bacteria|p__Cyanobacteriota|c__Cyanophyceae|o__Oscillatoriales|f__Sirenicapillariaceae|g__Limnoraphis|s__Limnoraphis_robusta	LEfSe	A	0.109563	0.00107108	no
A - H - I	d__Bacteria|p__Bacillota|c__Clostridia|o__Eubacteriales|f__Oscillospiraceae|g__Faecalispora|s__Faecalispora_unclassified	LEfSe	I	0.109377	0.0457915	no
A - H - I	d__Bacteria|p__Bacillota|c__Bacilli|o__Bacillales|f__Planococcaceae|g__Bhargavaea|s__Bhargavaea_massiliensis	LEfSe	A	0.109283	0.0164788	no
A - H - I	d__Bacteria|p__Pseudomonadota|c__Alphaproteobacteria|o__Hyphomicrobiales|f__Beijerinckiaceae|g__Beijerinckia	LEfSe	A	0.109121	0.0398887	no
A - H - I	d__Bacteria|p__Bacteroidota|c__Flavobacteriia|o__Flavobacteriales|f__Flavobacteriaceae|g__Flavobacterium|s__Flavobacterium_lutivivi	LEfSe	H	0.10906	0.0444689	no
A - H - I	d__Bacteria|p__Thermodesulfobacteriota|c__Desulfovibrionia|o__Desulfovibrionales|f__Desulfonatronaceae|g__Desulfonatronum|s__Desulfonatronum_thiosulfatophilum	LEfSe	A	0.108495	0.0299464	no
A - H - I	d__Bacteria|p__Bacillota|c__Clostridia|o__Eubacteriales|f__Oscillospiraceae|g__Flavonifractor|s__Flavonifractor_hominis	LEfSe	A	0.108311	0.0491438	no
A - H - I	d__Bacteria|p__Actinomycetota|c__Actinomycetes|o__Micrococcales|f__Microbacteriaceae|g__Microbacterium|s__Microbacterium_esteraromaticum	LEfSe	I	0.108309	0.00480303	no
A - H - I	d__Bacteria|p__Pseudomonadota|c__Alphaproteobacteria|o__Hyphomicrobiales|f__Aurantimonadaceae|g__Aureimonas|s__Aureimonas_glaciei	LEfSe	A	0.108206	0.0185014	no
A - H - I	d__Bacteria|p__Bacteroidota|c__Cytophagia|o__Cytophagales|f__Cyclobacteriaceae|g__Algoriphagus|s__Algoriphagus_sp.	LEfSe	I	0.107831	0.0465713	no
A - H - I	d__Bacteria|p__Bacteroidota|c__Flavobacteriia|o__Flavobacteriales|f__Flavobacteriaceae|g__Salegentibacter|s__Salegentibacter_lacus	LEfSe	A	0.107486	0.0234494	no
A - H - I	d__Bacteria|p__Bacillota|c__Bacilli|o__Bacillales|f__Paenibacillaceae|g__Paenibacillus|s__Paenibacillus_sp._453mf	LEfSe	H	0.107352	0.00103143	no
A - H - I	d__Bacteria|p__Bacillota|c__Bacilli|o__Lactobacillales|f__Streptococcaceae|g__Streptococcus|s__Streptococcus_hyovaginalis	LEfSe	H	0.107193	0.0207262	no
A - H - I	d__Bacteria|p__Bacteroidota|c__Flavobacteriia|o__Flavobacteriales|f__Flavobacteriaceae|g__Polaribacter|s__Polaribacter_marinus	LEfSe	I	0.107	0.0439534	no
A - H - I	d__Bacteria|p__Bacteroidota|c__Cytophagia|o__Cytophagales|f__Spirosomataceae|g__Runella|s__Runella_aurantiaca	LEfSe	A	0.106471	0.0300629	no
A - H - I	d__Bacteria|p__Bacteroidota|c__Cytophagia|o__Cytophagales|f__Flectobacillaceae|g__Aquirufa|s__Aquirufa_ecclesiirivi	LEfSe	A	0.10639	0.0291889	no
A - H - I	d__Bacteria|p__Bacillota|c__Bacilli|o__Bacillales|f__Paenibacillaceae|g__Saccharibacillus|s__Saccharibacillus_endophyticus	LEfSe	A	0.106201	0.0155994	no
A - H - I	d__Viruses|p__Uroviricota|c__Caudoviricetes|o__Caudoviricetes_unclassified|f__Caudoviricetes_unclassified|g__Caudoviricetes_unclassified|s__Siphoviridae_sp._ctDcW16	LEfSe	I	0.10595	0.00847386	no
A - H - I	d__Bacteria|p__Pseudomonadota|c__Betaproteobacteria|o__Nitrosomonadales|f__Nitrosomonadales_unclassified|g__Nitrosomonadales_unclassified|s__Gallionellales_bacterium_RIFCSPLOWO2_02_FULL_59_110	LEfSe	A	0.105851	0.0314049	no
A - H - I	d__Bacteria|p__Bacteroidota|c__Flavobacteriia|o__Flavobacteriales|f__Flavobacteriaceae|g__Salegentibacter|s__Salegentibacter_holothuriorum	LEfSe	A	0.105755	0.0324899	no
A - H - I	d__Bacteria|p__Bacteroidota|c__Flavobacteriia|o__Flavobacteriales|f__Flavobacteriaceae|g__Myroides|s__Myroides_sp._NP-2	LEfSe	A	0.105481	0.0353866	no
A - H - I	d__Bacteria|p__Bacteroidota|c__Cytophagia|o__Cytophagales|f__Hymenobacteraceae|g__Rufibacter|s__Rufibacter_sp._DG15C	LEfSe	A	0.105407	0.00583305	no
A - H - I	d__Bacteria|p__Candidatus_Woesebacteria|c__Candidatus_Woesebacteria_unclassified|o__Candidatus_Woesebacteria_unclassified|f__Candidatus_Woesebacteria_unclassified|g__Candidatus_Woesebacteria_unclassified|s__Candidatus_Woesebacteria_bacterium_GW2011_GWF1_31_35	LEfSe	H	0.104635	0.0160323	no
A - H - I	d__Bacteria|p__Bacillota|c__Bacilli|o__Bacillales|f__Bacillaceae|g__Cytobacillus|s__Cytobacillus_gottheilii	LEfSe	I	0.10426	0.034943	no
A - H - I	d__Bacteria|p__Pseudomonadota|c__Alphaproteobacteria|o__Rhodospirillales|f__Acetobacteraceae|g__Neokomagataea	LEfSe	A	0.104088	0.039297	no
A - H - I	d__Bacteria|p__Bacillota|c__Tissierellia|o__Tissierellales|f__Peptoniphilaceae|g__Anaerococcus|s__Anaerococcus_octavius	LEfSe	A	0.103679	0.0165123	no
A - H - I	d__Bacteria|p__Pseudomonadota|c__Alphaproteobacteria|o__Parvularculales|f__Parvularculaceae|g__Marinicaulis|s__Marinicaulis_sp.	LEfSe	A	0.103626	0.0252688	no
A - H - I	d__Bacteria|p__Actinomycetota|c__Coriobacteriia|o__Coriobacteriales|f__Atopobiaceae|g__Atopobium|s__Atopobium_sp.	LEfSe	A	0.103567	0.0478542	no
A - H - I	d__Bacteria|p__Pseudomonadota|c__Gammaproteobacteria|o__Enterobacterales|f__Pectobacteriaceae|g__Brenneria|s__Brenneria_izadpanahii	LEfSe	A	0.103483	0.013232	no
A - H - I	d__Bacteria|p__Pseudomonadota|c__Betaproteobacteria|o__Burkholderiales|f__Burkholderiaceae|g__Paraburkholderia|s__Paraburkholderia_fungorum	LEfSe	A	0.103095	0.0092433	no
A - H - I	d__Bacteria|p__Pseudomonadota|c__Alphaproteobacteria|o__Rhodospirillales|f__Acetobacteraceae|g__Sabulicella	LEfSe	A	0.103054	0.0417098	no
A - H - I	d__Bacteria|p__Pseudomonadota|c__Alphaproteobacteria|o__Rhodospirillales|f__Acetobacteraceae|g__Sabulicella|s__Sabulicella_rubraurantiaca	LEfSe	A	0.103054	0.0417098	no
A - H - I	d__Bacteria|p__Pseudomonadota|c__Alphaproteobacteria|o__Maricaulales|f__Maricaulaceae|g__Maricaulis|s__Maricaulis_salignorans	LEfSe	A	0.102308	0.0214256	no
A - H - I	d__Bacteria|p__Pseudomonadota|c__Alphaproteobacteria|o__Hyphomonadales|f__Hyphomonadaceae|g__Hyphomonas|s__Hyphomonas_pacifica	LEfSe	A	0.102296	0.0360033	no
A - H - I	d__Bacteria|p__Bacteroidota|c__Sphingobacteriia|o__Sphingobacteriales|f__Sphingobacteriaceae|g__Mucilaginibacter|s__Mucilaginibacter_kameinonensis	LEfSe	A	0.102285	0.0240159	no
A - H - I	d__Eukaryota|p__Zoopagomycota|c__Kickxellomycetes	LEfSe	A	0.102122	0.0384519	no
A - H - I	d__Eukaryota|p__Zoopagomycota|c__Kickxellomycetes|o__Kickxellales	LEfSe	A	0.102122	0.0384519	no
A - H - I	d__Eukaryota|p__Zoopagomycota|c__Kickxellomycetes|o__Kickxellales|f__Kickxellaceae	LEfSe	A	0.102122	0.0384519	no
A - H - I	d__Bacteria|p__Pseudomonadota|c__Alphaproteobacteria|o__Candidatus_Pelagibacterales|f__Candidatus_Pelagibacteraceae|g__Candidatus_Pelagibacteraceae_unclassified|s__Pelagibacteraceae_bacterium	LEfSe	A	0.102122	0.0318592	no
A - H - I	d__Bacteria|p__Bacteroidota|c__Sphingobacteriia|o__Sphingobacteriales|f__Sphingobacteriaceae|g__Sphingobacterium|s__Sphingobacterium_sp._xlx-130	LEfSe	A	0.102016	0.0449549	no
A - H - I	d__Bacteria|p__Cyanobacteriota|c__Cyanophyceae|o__Nostocales|f__Aphanizomenonaceae|g__Cylindrospermopsis	LEfSe	A	0.101804	0.0120152	no
A - H - I	d__Bacteria|p__Bacillota|c__Bacilli|o__Bacillales|f__Bacillaceae|g__Terrilactibacillus|s__Terrilactibacillus_tamarindi	LEfSe	H	0.101789	0.0250491	no
A - H - I	d__Bacteria|p__Fusobacteriota|c__Fusobacteriia|o__Fusobacteriales|f__Fusobacteriaceae|g__Fusobacterium|s__Fusobacterium_sp._1001295B_180824_G3	LEfSe	H	0.101677	0.0183558	no
A - H - I	d__Bacteria|p__Pseudomonadota|c__Alphaproteobacteria|o__Hyphomicrobiales|f__Phyllobacteriaceae|g__Aliihoeflea|s__Aliihoeflea_aestuarii	LEfSe	A	0.101428	0.0210056	no
A - H - I	d__Bacteria|p__Pseudomonadota|c__Alphaproteobacteria|o__Alphaproteobacteria_unclassified|f__Alphaproteobacteria_unclassified|g__Alphaproteobacteria_unclassified|s__Alphaproteobacteria_bacterium_MarineAlpha5_Bin7	LEfSe	A	0.101425	0.0176799	no
A - H - I	d__Bacteria|p__Fibrobacterota|c__Fibrobacteria|o__Fibrobacterales|f__Fibrobacteraceae|g__Fibrobacter|s__Fibrobacter_sp._UBA3629	LEfSe	A	0.101151	0.0183619	no
A - H - I	d__Bacteria|p__Bacteroidota|c__Flavobacteriia|o__Flavobacteriales|f__Weeksellaceae|g__Cloacibacterium|s__Cloacibacterium_caeni	LEfSe	H	0.10113	0.0465713	no
A - H - I	d__Bacteria|p__Actinomycetota|c__Actinomycetes|o__Bifidobacteriales|f__Bifidobacteriaceae|g__Bifidobacterium|s__Bifidobacterium_sp._56_9_plus	LEfSe	H	0.101075	0.0297761	no
A - H - I	d__Bacteria|p__Bdellovibrionota|c__Bdellovibrionia|o__Bdellovibrionales|f__Pseudobdellovibrionaceae|g__Bdellovibrio|s__Bdellovibrio_sp._SKB1291214	LEfSe	A	0.100828	0.039297	no
A - H - I	d__Bacteria|p__Bacillota|c__Bacilli|o__Bacillales|f__Paenibacillaceae|g__Brevibacillus|s__Brevibacillus_sp._AY1	LEfSe	H	0.100761	0.0272612	no
A - H - I	d__Viruses|p__Uroviricota|c__Caudoviricetes|o__Caudoviricetes_unclassified|f__Caudoviricetes_unclassified|g__Caudoviricetes_unclassified|s__Siphoviridae_sp._ct73V17	LEfSe	I	0.100707	0.00811319	no
A - H - I	d__Bacteria|p__Thermodesulfobacteriota|c__Desulfuromonadia|o__Desulfuromonadales|f__Geoalkalibacteraceae|g__Geoalkalibacter|s__Geoalkalibacter_ferrihydriticus	LEfSe	H	0.100517	0.0239601	no
A - H - I	d__Bacteria|p__Candidatus_Roizmanbacteria|c__Candidatus_Roizmanbacteria_unclassified|o__Candidatus_Roizmanbacteria_unclassified|f__Candidatus_Roizmanbacteria_unclassified|g__Candidatus_Roizmanbacteria_unclassified|s__Candidatus_Roizmanbacteria_bacterium_GW2011_GWB1_40_7	LEfSe	H	0.0998252	0.023063	no
A - H - I	d__Bacteria|p__Bacteroidota|c__Sphingobacteriia|o__Sphingobacteriales|f__Sphingobacteriaceae|g__Pedobacter|s__Pedobacter_sp._AJM	LEfSe	A	0.0998233	0.0181528	no
A - H - I	d__Bacteria|p__Actinomycetota|c__Actinomycetes|o__Actinomycetales|f__Actinomycetaceae|g__Schaalia|s__Schaalia_sp._lx-260	LEfSe	H	0.099522	0.0335148	no
A - H - I	d__Bacteria|p__Pseudomonadota|c__Alphaproteobacteria|o__Hyphomicrobiales|f__Bartonellaceae|g__Bartonella|s__Bartonella_sp._HY406	LEfSe	A	0.0990164	0.00563756	no
A - H - I	d__Bacteria|p__Bdellovibrionota|c__Bacteriovoracia|o__Bacteriovoracales|f__Bacteriovoracaceae|g__Bacteriovorax|s__Bacteriovorax_sp._DB6_IX	LEfSe	A	0.0987194	0.0478635	no
A - H - I	d__Bacteria|p__Cyanobacteriota|c__Cyanophyceae|o__Nostocales|f__Aphanizomenonaceae|g__Cylindrospermopsis|s__Cylindrospermopsis_raciborskii	LEfSe	A	0.0987004	0.0149328	no
A - H - I	d__Bacteria|p__Bacillota|c__Tissierellia|o__Tissierellales|f__Peptoniphilaceae|g__Anaerococcus|s__Anaerococcus_degeneri	LEfSe	H	0.0985451	0.0076961	no
A - H - I	d__Bacteria|p__Bacteroidota|c__Cytophagia|o__Cytophagales|f__Cyclobacteriaceae|g__Algoriphagus|s__Algoriphagus_marincola	LEfSe	H	0.0983396	0.00328381	no
A - H - I	d__Viruses|p__Uroviricota|c__Caudoviricetes|o__Caudoviricetes_unclassified|f__Caudoviricetes_unclassified|g__Caudoviricetes_unclassified|s__Siphoviridae_sp._ctRcp9	LEfSe	H	0.0975223	0.0241294	no
A - H - I	d__Bacteria|p__Bacillota|c__Bacilli|o__Bacillales|f__Paenibacillaceae|g__Chengkuizengella|s__Chengkuizengella_sediminis	LEfSe	A	0.0973706	0.00369012	no
A - H - I	d__Bacteria|p__Bacteroidota|c__Cytophagia|o__Cytophagales|f__Rhodocytophagaceae|g__Xanthocytophaga|s__Xanthocytophaga_agilis	LEfSe	A	0.0972767	0.035113	no
A - H - I	d__Bacteria|p__Bacteroidota|c__Cytophagia|o__Cytophagales|f__Spirosomataceae|g__Dyadobacter|s__Dyadobacter_sp._MSC1_007	LEfSe	I	0.096978	0.00462463	no
A - H - I	d__Bacteria|p__Actinomycetota|c__Actinomycetes|o__Mycobacteriales|f__Corynebacteriaceae|g__Corynebacterium|s__Corynebacterium_efficiens	LEfSe	H	0.0969398	0.0419778	no
A - H - I	d__Bacteria|p__Pseudomonadota|c__Alphaproteobacteria|o__Rickettsiales|f__Anaplasmataceae|g__Ehrlichia|s__Ehrlichia_ruminantium	LEfSe	A	0.0966828	0.0113872	no
A - H - I	d__Bacteria|p__Pseudomonadota|c__Alphaproteobacteria|o__Hyphomicrobiales|f__Salaquimonadaceae	LEfSe	A	0.096649	0.0437415	no
A - H - I	d__Bacteria|p__Pseudomonadota|c__Alphaproteobacteria|o__Hyphomicrobiales|f__Salaquimonadaceae|g__Salaquimonas	LEfSe	A	0.096649	0.0437415	no
A - H - I	d__Bacteria|p__Pseudomonadota|c__Alphaproteobacteria|o__Hyphomicrobiales|f__Salaquimonadaceae|g__Salaquimonas|s__Salaquimonas_pukyongi	LEfSe	A	0.096649	0.0437415	no
A - H - I	d__Bacteria|p__Pseudomonadota|c__Gammaproteobacteria|o__Legionellales|f__Legionellaceae|g__Legionella|s__Legionella_drozanskii	LEfSe	A	0.0964594	0.0262436	no
A - H - I	d__Bacteria|p__Pseudomonadota|c__Alphaproteobacteria|o__Rhodobacterales|f__Roseobacteraceae|g__Tateyamaria	LEfSe	A	0.0963356	0.0334823	no
A - H - I	d__Bacteria|p__Pseudomonadota|c__Gammaproteobacteria|o__Oceanospirillales|f__Alcanivoracaceae|g__Marinicella|s__Marinicella_rhabdoformis	LEfSe	I	0.0962162	0.00661214	no
A - H - I	d__Bacteria|p__Pseudomonadota|c__Alphaproteobacteria|o__Maricaulales|f__Maricaulaceae|g__Hyphobacterium|s__Hyphobacterium_marinum	LEfSe	A	0.0955087	0.0127603	no
A - H - I	d__Bacteria|p__Bacillota|c__Bacilli|o__Lactobacillales|f__Lactobacillaceae|g__Secundilactobacillus|s__Secundilactobacillus_malefermentans	LEfSe	H	0.0953946	0.0410064	no
A - H - I	d__Bacteria|p__Bacteroidota|c__Chitinophagia|o__Chitinophagales|f__Chitinophagaceae|g__Chitinophaga|s__Chitinophaga_costaii	LEfSe	A	0.0951842	0.0248554	no
A - H - I	d__Bacteria|p__Bacteroidota|c__Sphingobacteriia|o__Sphingobacteriales|f__Sphingobacteriaceae|g__Sphingobacterium|s__Sphingobacterium_detergens	LEfSe	H	0.0950683	0.0022447	no
A - H - I	d__Bacteria|p__Candidatus_Wolfebacteria|c__Candidatus_Wolfebacteria_unclassified|o__Candidatus_Wolfebacteria_unclassified|f__Candidatus_Wolfebacteria_unclassified|g__Candidatus_Wolfebacteria_unclassified|s__Candidatus_Wolfebacteria_bacterium_GW2011_GWC2_46_275	LEfSe	A	0.0950059	0.0272983	no
A - H - I	d__Bacteria|p__Actinomycetota|c__Actinomycetes|o__Pseudonocardiales|f__Pseudonocardiaceae|g__Amycolatopsis|s__Amycolatopsis_magusensis	LEfSe	H	0.0949842	0.0448677	no
A - H - I	d__Bacteria|p__Actinomycetota|c__Acidimicrobiia|o__Acidimicrobiales|f__Ilumatobacteraceae|g__Ilumatobacter|s__Ilumatobacter_coccineus	LEfSe	A	0.0949691	0.0333331	no
A - H - I	d__Bacteria|p__Actinomycetota|c__Actinomycetes|o__Bifidobacteriales|f__Bifidobacteriaceae|g__Pseudoscardovia	LEfSe	H	0.0948425	0.00435288	no
A - H - I	d__Bacteria|p__Actinomycetota|c__Actinomycetes|o__Micrococcales|f__Cellulomonadaceae|g__Cellulomonas|s__Cellulomonas_hominis	LEfSe	H	0.0946324	0.0287838	no
A - H - I	d__Bacteria|p__Bacillota|c__Bacilli|o__Bacillales|f__Bacillaceae|g__Peribacillus|s__Peribacillus_saganii	LEfSe	H	0.0945049	0.0210056	no
A - H - I	d__Bacteria|p__Actinomycetota|c__Actinomycetes|o__Streptosporangiales|f__Streptosporangiaceae|g__Nonomuraea|s__Nonomuraea_sp._NEAU-A123	LEfSe	H	0.094275	0.00826235	no
A - H - I	d__Bacteria|p__Bacillota|c__Clostridia|o__Lachnospirales|f__Lachnospiraceae|g__Lachnospiraceae_unclassified|s__Lachnospiraceae_bacterium_TF10-8AT	LEfSe	I	0.0942692	0.0314049	no
A - H - I	d__Bacteria|p__Bacteroidota|c__Cytophagia|o__Cytophagales|f__Cytophagaceae|g__Spirosoma|s__Spirosoma_liriopis	LEfSe	H	0.0942198	0.0137656	no
A - H - I	d__Bacteria|p__Bacteroidota|c__Sphingobacteriia|o__Sphingobacteriales|f__Sphingobacteriaceae|g__Sphingobacterium|s__Sphingobacterium_cavernae	LEfSe	H	0.093983	0.0448677	no
A - H - I	d__Bacteria|p__Bacteroidota|c__Flavobacteriia|o__Flavobacteriales|f__Flavobacteriaceae|g__Zhouia|s__Zhouia_spongiae	LEfSe	A	0.0939577	0.0252052	no
A - H - I	d__Bacteria|p__Campylobacterota|c__Epsilonproteobacteria|o__Campylobacterales|f__Campylobacteraceae|g__Campylobacter|s__Campylobacter_sp._MIT_19-121	LEfSe	H	0.0937936	0.00126484	no
A - H - I	d__Archaea|p__Euryarchaeota|c__Methanomicrobia|o__Methanomicrobiales|f__Methanomicrobiaceae|g__Methanoplanus|s__Methanoplanus_limicola	LEfSe	A	0.0937926	0.023413	no
A - H - I	d__Bacteria|p__Candidatus_Yanofskyibacteriota|c__Candidatus_Yanofskyibacteriota_unclassified|o__Candidatus_Yanofskyibacteriota_unclassified|f__Candidatus_Yanofskyibacteriota_unclassified|g__Candidatus_Yanofskyibacteriota_unclassified|s__Candidatus_Yanofskybacteria_bacterium_RIFCSPLOWO2_02_FULL_45_18	LEfSe	A	0.0936499	0.0165838	no
A - H - I	d__Bacteria|p__Bacteroidota|c__Cytophagia|o__Cytophagales|f__Flammeovirgaceae|g__Imperialibacter|s__Imperialibacter_roseus	LEfSe	H	0.0936001	0.0349529	no
A - H - I	d__Bacteria|p__Bacteroidota|c__Cytophagia|o__Cytophagales|f__Spirosomataceae|g__Larkinella|s__Larkinella_rosea	LEfSe	A	0.0933126	0.0388722	no
A - H - I	d__Bacteria|p__Thermodesulfobacteriota|c__Desulfobulbia|o__Desulfobulbales|f__Desulfobulbaceae|g__Candidatus_Electrothrix|s__Candidatus_Electrothrix_communis	LEfSe	A	0.0925345	0.0381323	no
A - H - I	d__Bacteria|p__Bacteroidota|c__Flavobacteriia|o__Flavobacteriales|f__Flavobacteriaceae|g__Polaribacter|s__Polaribacter_porphyrae	LEfSe	A	0.0923308	0.0464359	no
A - H - I	d__Bacteria|p__Bacteroidota|c__Flavobacteriia|o__Flavobacteriales|f__Weeksellaceae|g__Epilithonimonas|s__Epilithonimonas_tenax	LEfSe	H	0.0923246	0.00850848	no
A - H - I	d__Bacteria|p__Bacteroidota|c__Sphingobacteriia|o__Sphingobacteriia_unclassified|f__Sphingobacteriia_unclassified|g__Sphingobacteriia_unclassified|s__Sphingobacteriia_bacterium	LEfSe	I	0.0921821	0.0203001	no
A - H - I	d__Bacteria|p__Pseudomonadota|c__Alphaproteobacteria|o__Rhodospirillales|f__Acetobacteraceae|g__Siccirubricoccus|s__Siccirubricoccus_phaeus	LEfSe	A	0.0919506	0.0208131	no
A - H - I	d__Bacteria|p__Ignavibacteriota|c__Ignavibacteria|o__Ignavibacteria_unclassified|f__Ignavibacteria_unclassified|g__Ignavibacteria_unclassified|s__Ignavibacteria_bacterium_CG2_30_36_16	LEfSe	A	0.0918118	0.0291889	no
A - H - I	d__Bacteria|p__Bacteroidota|c__Chitinophagia|o__Chitinophagales|f__Chitinophagaceae|g__Filimonas|s__Filimonas_lacunae	LEfSe	I	0.0917364	0.0419778	no
A - H - I	d__Bacteria|p__Pseudomonadota|c__Gammaproteobacteria|o__Cellvibrionales|f__Cellvibrionaceae|g__Saccharophagus	LEfSe	A	0.0916036	0.0160323	no
A - H - I	d__Bacteria|p__Chloroflexota|c__Chloroflexota_unclassified|o__Chloroflexota_unclassified|f__Chloroflexota_unclassified|g__Chloroflexota_unclassified|s__Chloroflexi_bacterium_RBG_16_57_8	LEfSe	H	0.0915199	0.0393963	no
A - H - I	d__Bacteria|p__Bacillota|c__Bacilli|o__Bacillales|f__Paenibacillaceae|g__Paenibacillus|s__Paenibacillus_cellulositrophicus	LEfSe	H	0.0915065	0.00400899	no
A - H - I	d__Bacteria|p__Pseudomonadota|c__Alphaproteobacteria|o__Hyphomicrobiales|f__Devosiaceae|g__Devosia|s__uncultured_Devosia_sp.	LEfSe	A	0.091359	0.0343046	no
A - H - I	d__Bacteria|p__Bacillota|c__Bacilli|o__Bacillales|f__Bacillaceae|g__Psychrobacillus|s__Psychrobacillus_sp._NEAU-3TGS	LEfSe	H	0.0909638	0.0129173	no
A - H - I	d__Bacteria|p__Pseudomonadota|c__Gammaproteobacteria|o__Oceanospirillales|f__Oceanospirillaceae|g__Marinospirillum	LEfSe	A	0.0908901	0.0174583	no
A - H - I	d__Bacteria|p__Pseudomonadota|c__Alphaproteobacteria|o__Alphaproteobacteria_unclassified|f__Alphaproteobacteria_unclassified|g__Alphaproteobacteria_unclassified|s__Alphaproteobacteria_bacterium_HGW-Alphaproteobacteria-10	LEfSe	A	0.0904271	0.0280775	no
A - H - I	d__Viruses|p__Uroviricota|c__Caudoviricetes|o__Caudoviricetes_unclassified|f__Caudoviricetes_unclassified|g__Efquatrovirus|s__Enterococcus_phage_phiNASRA1	LEfSe	I	0.0903904	0.00806972	no
A - H - I	d__Bacteria|p__Pseudomonadota|c__Betaproteobacteria|o__Burkholderiales|f__Sphaerotilaceae|g__Roseateles|s__Roseateles_koreensis	LEfSe	H	0.0902883	0.0489552	no
A - H - I	d__Bacteria|p__Pseudomonadota|c__Alphaproteobacteria|o__Hyphomicrobiales|f__Hyphomicrobiales_unclassified|g__Nordella	LEfSe	A	0.0902541	0.0484994	no
A - H - I	d__Bacteria|p__Pseudomonadota|c__Alphaproteobacteria|o__Hyphomicrobiales|f__Hyphomicrobiales_unclassified|g__Nordella|s__Nordella_sp._HKS_07	LEfSe	A	0.0902541	0.0484994	no
A - H - I	d__Bacteria|p__Candidatus_Margulisiibacteriota|c__Candidatus_Margulisiibacteriota_unclassified|o__Candidatus_Margulisiibacteriota_unclassified|f__Candidatus_Margulisiibacteriota_unclassified|g__Candidatus_Margulisiibacteriota_unclassified|s__Candidatus_Margulisiibacteriota_bacterium	LEfSe	H	0.0902166	0.0467979	no
A - H - I	d__Bacteria|p__Bacteroidota|c__Cytophagia|o__Cytophagales|f__Hymenobacteraceae|g__Hymenobacter|s__Hymenobacter_sp._BT188	LEfSe	I	0.0900399	0.0202926	no
A - H - I	d__Bacteria|p__Bacillota|c__Clostridia|o__Eubacteriales|f__Oscillospiraceae|g__Ruminococcus|s__Ruminococcus_sp._CAG:9	LEfSe	I	0.0900209	0.0204862	no
A - H - I	d__Bacteria|p__Bacteroidota|c__Flavobacteriia|o__Flavobacteriales|f__Weeksellaceae|g__Chryseobacterium|s__Chryseobacterium_sp._CCH4-E10	LEfSe	H	0.0896436	0.0142632	no
A - H - I	d__Bacteria|p__Bacteroidota|c__Flavobacteriia|o__Flavobacteriales|f__Flavobacteriaceae|g__Bizionia|s__Bizionia_arctica	LEfSe	H	0.0895094	0.0386294	no
A - H - I	d__Bacteria|p__Pseudomonadota|c__Gammaproteobacteria|o__Alteromonadales|f__Pseudoalteromonadaceae|g__Pseudoalteromonas|s__Pseudoalteromonas_agarivorans	LEfSe	I	0.0893788	0.0264692	no
A - H - I	d__Bacteria|p__Pseudomonadota|c__Alphaproteobacteria|o__Rickettsiales|f__Anaplasmataceae|g__Candidatus_Mesenet	LEfSe	A	0.0893213	0.0353043	no
A - H - I	d__Bacteria|p__Pseudomonadota|c__Alphaproteobacteria|o__Rickettsiales|f__Anaplasmataceae|g__Candidatus_Mesenet|s__Candidatus_Mesenet_longicola	LEfSe	A	0.0893213	0.0353043	no
A - H - I	d__Bacteria|p__Bacillota|c__Bacilli|o__Bacillales|f__Planococcaceae|g__Ureibacillus|s__Ureibacillus_manganicus	LEfSe	A	0.0892666	0.0236276	no
A - H - I	d__Bacteria|p__Pseudomonadota|c__Alphaproteobacteria|o__Iodidimonadales|f__Iodidimonadaceae|g__Iodidimonas|s__Iodidimonas_muriae	LEfSe	A	0.0890015	0.0223604	no
A - H - I	d__Bacteria|p__Bacillota|c__Bacilli|o__Lactobacillales|f__Streptococcaceae|g__Streptococcus|s__Streptococcus_minor	LEfSe	H	0.088943	0.0119362	no
A - H - I	d__Bacteria|p__Thermodesulfobacteriota|c__Desulfovibrionia|o__Desulfovibrionales|f__Desulfovibrionaceae|g__Halodesulfovibrio|s__Halodesulfovibrio_marinisediminis	LEfSe	H	0.0888795	0.0353866	no
A - H - I	d__Bacteria|p__Bacillota|c__Bacilli|o__Bacillales|f__Paenibacillaceae|g__Paenibacillus|s__Paenibacillus_sp._FSL_R7-0337	LEfSe	A	0.0887744	0.0165059	no
A - H - I	d__Bacteria|p__Actinomycetota|c__Actinomycetes|o__Actinomycetales|f__Actinomycetaceae|g__Nanchangia	LEfSe	A	0.0886535	0.0207262	no
A - H - I	d__Bacteria|p__Actinomycetota|c__Actinomycetes|o__Actinomycetales|f__Actinomycetaceae|g__Nanchangia|s__Nanchangia_anserum	LEfSe	A	0.0886535	0.0207262	no
A - H - I	d__Bacteria|p__Pseudomonadota|c__Alphaproteobacteria|o__Rhodospirillales|f__Acetobacteraceae|g__Acidisoma|s__Acidisoma_sp.	LEfSe	A	0.0886317	0.0140472	no
A - H - I	d__Bacteria|p__Bacteroidota|c__Cytophagia|o__Cytophagales|f__Amoebophilaceae	LEfSe	A	0.0885447	0.0432684	no
A - H - I	d__Bacteria|p__Cyanobacteriota|c__Cyanophyceae|o__Nodosilineales	LEfSe	H	0.0885348	0.0105316	no
A - H - I	d__Archaea|p__Euryarchaeota|c__Methanomicrobia|o__Methanomicrobiales|f__Methanospirillaceae|g__Methanospirillum|s__uncultured_Methanospirillum_sp.	LEfSe	H	0.088522	0.00514465	no
A - H - I	d__Bacteria|p__Pseudomonadota|c__Gammaproteobacteria|o__Lysobacterales|f__Lysobacteraceae|g__Arenimonas|s__Arenimonas_sp._GDDSR-1	LEfSe	A	0.0883102	0.0345384	no
A - H - I	d__Bacteria|p__Campylobacterota|c__Desulfurellia|o__Desulfurellales|f__Hippeaceae|g__Hippea|s__Hippea_maritima	LEfSe	H	0.0882964	0.0388494	no
A - H - I	d__Bacteria|p__Bacteroidota|c__Flavobacteriia|o__Flavobacteriales|f__Flavobacteriaceae|g__Maribacter|s__Maribacter_sp.	LEfSe	H	0.0882809	0.0219348	no
A - H - I	d__Viruses|p__Uroviricota|c__Caudoviricetes|o__Caudoviricetes_unclassified|f__Caudoviricetes_unclassified|g__Caudoviricetes_unclassified|s__Siphoviridae_sp._ctQU013	LEfSe	I	0.0881998	0.0478635	no
A - H - I	d__Bacteria|p__Cyanobacteriota|c__Cyanophyceae|o__Nostocales|f__Aphanizomenonaceae|g__Dolichospermum|s__Dolichospermum_circinale	LEfSe	A	0.0881634	0.00784944	no
A - H - I	d__Bacteria|p__Bacillota|c__Clostridia|o__Lachnospirales|f__Lachnospiraceae|g__Roseburia|s__Roseburia_sp._OM04-10AA	LEfSe	I	0.0880879	0.0130505	no
A - H - I	d__Bacteria|p__Pseudomonadota|c__Gammaproteobacteria|o__Vibrionales|f__Vibrionaceae|g__Vibrio|s__Vibrio_porteresiae	LEfSe	I	0.0879121	0.0206418	no
A - H - I	d__Bacteria|p__Bacteroidota|c__Chitinophagia|o__Chitinophagales|f__Chitinophagaceae|g__Niastella|s__Niastella_populi	LEfSe	A	0.0875598	0.0478542	no
A - H - I	d__Bacteria|p__Bacillota|c__Clostridia|o__Eubacteriales|f__Eubacteriaceae|g__Eubacterium|s__Eubacterium_sp._CAG:146	LEfSe	H	0.0874513	0.0111609	no
A - H - I	d__Bacteria|p__Bacteroidota|c__Bacteroidia|o__Bacteroidales|f__Prevotellaceae|g__Prevotella|s__Prevotella_sp._TF12-30	LEfSe	I	0.087434	0.0120666	no
A - H - I	d__Bacteria|p__Cyanobacteriota|c__Cyanophyceae|o__Nodosilineales|f__Nodosilineaceae	LEfSe	A	0.0874262	0.00467517	no
A - H - I	d__Bacteria|p__Pseudomonadota|c__Gammaproteobacteria|o__Pseudomonadales|f__Pseudohongiellaceae	LEfSe	A	0.0872289	0.0395726	no
A - H - I	d__Bacteria|p__Pseudomonadota|c__Gammaproteobacteria|o__Pseudomonadales|f__Pseudohongiellaceae|g__Pseudohongiella	LEfSe	A	0.0872289	0.0395726	no
A - H - I	d__Bacteria|p__Bacteroidota|c__Flavobacteriia|o__Flavobacteriales|f__Flavobacteriaceae|g__Aquimarina|s__Aquimarina_unclassified	LEfSe	A	0.0871676	0.0196298	no
A - H - I	d__Bacteria|p__Chloroflexota|c__Thermoflexia|o__Thermoflexales|f__Thermoflexaceae|g__Thermoflexus|s__Thermoflexus_unclassified	LEfSe	A	0.086803	0.0444689	no
A - H - I	d__Bacteria|p__Bacillota|c__Bacilli|o__Bacillales|f__Paenibacillaceae|g__Paenibacillus|s__Paenibacillus_sp._OK060	LEfSe	I	0.0866886	0.0419778	no
A - H - I	d__Bacteria|p__Bacillota|c__Bacilli|o__Lactobacillales|f__Enterococcaceae|g__Enterococcus|s__Enterococcus_sp._5B3_DIV0040	LEfSe	A	0.0866193	0.0496423	no
A - H - I	d__Bacteria|p__Bacillota|c__Bacilli|o__Bacillales|f__Bacillaceae|g__Lysinibacillus|s__Lysinibacillus_sp._FN11	LEfSe	A	0.0865063	0.00207585	no
A - H - I	d__Bacteria|p__Pseudomonadota|c__Gammaproteobacteria|o__Enterobacterales|f__Yersiniaceae|g__Yersinia|s__Yersinia_kristensenii	LEfSe	A	0.0864868	0.00886245	no
A - H - I	d__Bacteria|p__Bacteroidota|c__Flavobacteriia|o__Flavobacteriales|f__Flavobacteriaceae|g__Salinimicrobium|s__Salinimicrobium_marinum	LEfSe	H	0.0863525	0.00848209	no
A - H - I	d__Bacteria|p__Pseudomonadota|c__Gammaproteobacteria|o__Chromatiales|f__Chromatiaceae|g__Thiocapsa|s__Thiocapsa_rosea	LEfSe	A	0.0862301	0.0104295	no
A - H - I	d__Bacteria|p__Pseudomonadota|c__Alphaproteobacteria|o__Hyphomicrobiales|f__Hyphomicrobiaceae|g__Methyloceanibacter|s__Methyloceanibacter_sp.	LEfSe	A	0.0862266	0.0381323	no
A - H - I	d__Bacteria|p__Pseudomonadota|c__Gammaproteobacteria|o__Vibrionales|f__Vibrionaceae|g__Vibrio|s__Vibrio_rumoiensis	LEfSe	A	0.0861237	0.0389658	no
A - H - I	d__Bacteria|p__Pseudomonadota|c__Betaproteobacteria|o__Burkholderiales|f__Burkholderiaceae|g__Paraburkholderia|s__Paraburkholderia_unclassified	LEfSe	H	0.0859426	0.0216136	no
A - H - I	d__Bacteria|p__Pseudomonadota|c__Alphaproteobacteria|o__Rhodobacterales|f__Paracoccaceae|g__Paracoccaceae_unclassified|s__Rhodobacteraceae_bacterium_W635	LEfSe	A	0.0858558	0.0361643	no
A - H - I	d__Bacteria|p__Pseudomonadota|c__Alphaproteobacteria|o__Rhodospirillales|f__Acetobacteraceae|g__Asaia|s__Asaia_siamensis	LEfSe	I	0.0857197	0.0257986	no
A - H - I	d__Bacteria|p__Bacillota|c__Negativicutes|o__Veillonellales|f__Veillonellaceae|g__Megasphaera|s__Megasphaera_sp._UPII_135-E	LEfSe	A	0.0857096	0.0168458	no
A - H - I	d__Bacteria|p__Bacillota|c__Bacilli|o__Bacillales|f__Bacillaceae|g__Cytobacillus|s__Cytobacillus_sp._IB215665	LEfSe	A	0.085649	0.0114884	no
A - H - I	d__Bacteria|p__Actinomycetota|c__Actinomycetes|o__Micrococcales|f__Ruaniaceae	LEfSe	H	0.085623	0.0341186	no
A - H - I	d__Bacteria|p__Bacteroidota|c__Flavobacteriia|o__Flavobacteriales|f__Flavobacteriaceae|g__Flavobacterium|s__Flavobacterium_xinjiangense	LEfSe	H	0.0855603	0.0190259	no
A - H - I	d__Bacteria|p__Pseudomonadota|c__Betaproteobacteria|o__Burkholderiales|f__Alcaligenaceae|g__Kerstersia	LEfSe	I	0.0853789	0.0395726	no
A - H - I	d__Bacteria|p__Pseudomonadota|c__Betaproteobacteria|o__Burkholderiales|f__Alcaligenaceae|g__Kerstersia|s__Kerstersia_gyiorum	LEfSe	I	0.0853789	0.0395726	no
A - H - I	d__Bacteria|p__Candidatus_Magasanikiibacteriota|c__Candidatus_Magasanikiibacteriota_unclassified|o__Candidatus_Magasanikiibacteriota_unclassified|f__Candidatus_Magasanikiibacteriota_unclassified|g__Candidatus_Magasanikiibacteriota_unclassified|s__Candidatus_Magasanikbacteria_bacterium_RIFCSPHIGHO2_02_FULL_50_9b	LEfSe	A	0.0851155	0.0359441	no
A - H - I	d__Bacteria|p__Pseudomonadota|c__Gammaproteobacteria|o__Methylococcales|f__Methylococcaceae|g__Methylovulum|s__Methylovulum_psychrotolerans	LEfSe	H	0.0850549	0.0457915	no
A - H - I	d__Bacteria|p__Bacteroidota|c__Flavobacteriia|o__Flavobacteriales|f__Weeksellaceae|g__Chryseobacterium|s__Chryseobacterium_defluvii	LEfSe	H	0.0849015	0.0485088	no
A - H - I	d__Bacteria|p__Pseudomonadota|c__Alphaproteobacteria|o__Hyphomicrobiales|f__Brucellaceae|g__Brucella|s__Brucella_unclassified	LEfSe	I	0.0848753	0.0440394	no
A - H - I	d__Bacteria|p__Pseudomonadota|c__Gammaproteobacteria|o__Methylococcales|f__Methylococcaceae|g__Methylomonas|s__Methylomonas_sp.	LEfSe	I	0.0848364	0.0272983	no
A - H - I	d__Bacteria|p__Elusimicrobiota|c__Endomicrobiia|o__Endomicrobiales|f__Endomicrobiaceae|g__Endomicrobium|s__Candidatus_Endomicrobium_sp._MdDo-005	LEfSe	H	0.0847454	0.027909	no
A - H - I	d__Bacteria|p__Candidatus_Bipolaricaulota|c__Candidatus_Bipolaricaulia|o__Candidatus_Bipolaricaulales|f__Candidatus_Bipolaricaulaceae|g__Candidatus_Bipolaricaulis|s__Candidatus_Bipolaricaulis_sibiricus	LEfSe	A	0.0846783	0.0422312	no
A - H - I	d__Bacteria|p__Bacillota|c__Bacilli|o__Bacillales|f__Alicyclobacillaceae|g__Alicyclobacillus|s__Alicyclobacillus_kakegawensis	LEfSe	A	0.0844822	0.0319149	no
A - H - I	d__Bacteria|p__Pseudomonadota|c__Alphaproteobacteria|o__Sphingomonadales|f__Erythrobacteraceae|g__Qipengyuania|s__Qipengyuania_aestuarii	LEfSe	A	0.0844674	0.0376031	no
A - H - I	d__Viruses|p__Uroviricota|c__Caudoviricetes|o__Caudoviricetes_unclassified|f__Caudoviricetes_unclassified|g__Caudoviricetes_unclassified|s__Siphoviridae_sp._ctcUB23	LEfSe	A	0.0844363	0.0127147	no
A - H - I	d__Bacteria|p__Chlorobiota|c__Chlorobiia|o__Chlorobiales|f__Chlorobiaceae|g__Chlorobaculum|s__Chlorobaculum_sp._24CR	LEfSe	H	0.0843763	0.0112847	no
A - H - I	d__Bacteria|p__Pseudomonadota|c__Gammaproteobacteria|o__Pseudomonadales|f__Pseudomonadaceae|g__Pseudomonas|s__Pseudomonas_chlororaphis	LEfSe	A	0.0842097	0.0291889	no
A - H - I	d__Bacteria|p__Bacillota|c__Clostridia|o__Lachnospirales|f__Lachnospiraceae|g__Lachnospiraceae_unclassified|s__Lachnospiraceae_bacterium_AM23-7LB	LEfSe	H	0.0841465	0.0493637	no
A - H - I	d__Bacteria|p__Bacillota|c__Bacilli|o__Bacillales|f__Paenibacillaceae|g__Paenibacillus|s__Paenibacillus_validus	LEfSe	H	0.0838875	0.0280775	no
A - H - I	d__Bacteria|p__Bacillota|c__Clostridia|o__Eubacteriales|f__Clostridiaceae|g__Clostridium|s__Clostridium_sp._AF15-49	LEfSe	A	0.0837421	0.0228635	no
A - H - I	d__Bacteria|p__Bacillota|c__Bacilli|o__Bacillales|f__Paenibacillaceae|g__Paenibacillus|s__Paenibacillus_sp._MAHUQ-63	LEfSe	A	0.0834457	0.0412749	no
A - H - I	d__Bacteria|p__Pseudomonadota|c__Alphaproteobacteria|o__Rhodobacterales|f__Paracoccaceae|g__Nioella	LEfSe	A	0.0832282	0.0261419	no
A - H - I	d__Bacteria|p__Bacillota|c__Bacilli|o__Bacillales|f__Bacillaceae|g__Alteribacter|s__Alteribacter_keqinensis	LEfSe	A	0.0829539	0.0291889	no
A - H - I	d__Bacteria|p__Bacillota|c__Bacilli|o__Bacillales|f__Bacillaceae|g__Alkalihalobacillus|s__Alkalihalobacillus_pseudalcaliphilus	LEfSe	H	0.0828767	0.0121654	no
A - H - I	d__Bacteria|p__Bacillota|c__Tissierellia|o__Tissierellales|f__Peptoniphilaceae|g__Anaerococcus|s__Anaerococcus_lactolyticus	LEfSe	A	0.08276	0.00241464	no
A - H - I	d__Bacteria|p__Bacteroidota|c__Flavobacteriia|o__Flavobacteriales|f__Flavobacteriaceae|g__Flavobacterium|s__Flavobacterium_sp._AG291	LEfSe	A	0.0825696	0.0483115	no
A - H - I	d__Bacteria|p__Pseudomonadota|c__Alphaproteobacteria|o__Hyphomicrobiales|f__Methylobacteriaceae|g__Methylobacterium|s__Methylobacterium_oryzihabitans	LEfSe	A	0.0825424	0.00295533	no
A - H - I	d__Bacteria|p__Pseudomonadota|c__Alphaproteobacteria|o__Rhodobacterales|f__Roseobacteraceae|g__Roseovarius|s__Roseovarius_sp.	LEfSe	A	0.0822912	0.0300629	no
A - H - I	d__Bacteria|p__Planctomycetota|c__Planctomycetota_unclassified|o__Planctomycetota_unclassified|f__Planctomycetota_unclassified|g__Planctomycetota_unclassified|s__Planctomycetes_bacterium_DG_58	LEfSe	A	0.082136	0.00573438	no
A - H - I	d__Bacteria|p__Bacillota|c__Bacilli|o__Lactobacillales|f__Lactobacillaceae|g__Lactobacillus|s__Lactobacillus_melliventris	LEfSe	I	0.0820686	0.0125427	no
A - H - I	d__Bacteria|p__Pseudomonadota|c__Alphaproteobacteria|o__Rhodobacterales|f__Paracoccaceae|g__Nioella|s__Nioella_nitratireducens	LEfSe	A	0.0818767	0.0251661	no
A - H - I	d__Bacteria|p__Bacillota|c__Clostridia|o__Eubacteriales|f__Clostridiaceae|g__Clostridium|s__Clostridium_sp._YIM_B02569	LEfSe	H	0.0818533	0.0386915	no
A - H - I	d__Bacteria|p__Pseudomonadota|c__Betaproteobacteria|o__Burkholderiales|f__Burkholderiales_unclassified|g__Tepidimonas|s__Tepidimonas_sp.	LEfSe	I	0.0817965	0.0149018	no
A - H - I	d__Bacteria|p__Thermodesulfobacteriota|c__Desulfovibrionia|o__Desulfovibrionales|f__Desulfovibrionaceae|g__Pseudodesulfovibrio|s__Pseudodesulfovibrio_tunisiensis	LEfSe	H	0.0816092	0.0491438	no
A - H - I	d__Bacteria|p__Bacteroidota|c__Bacteroidia|o__Bacteroidales|f__Odoribacteraceae|g__Butyricimonas|s__Butyricimonas_sp._HCN-50115	LEfSe	I	0.0814165	0.0325341	no
A - H - I	d__Bacteria|p__Pseudomonadota|c__Gammaproteobacteria|o__Enterobacterales|f__Pectobacteriaceae|g__Brenneria|s__Brenneria_unclassified	LEfSe	I	0.0813598	0.0399507	no
A - H - I	d__Bacteria|p__Pseudomonadota|c__Alphaproteobacteria|o__Hyphomicrobiales|f__Methylobacteriaceae|g__Microvirga|s__Microvirga_massiliensis	LEfSe	I	0.0812713	0.024002	no
A - H - I	d__Bacteria|p__Lentisphaerota|c__Lentisphaeria|o__Lentisphaerales|f__Lentisphaeraceae|g__Lentisphaera|s__Lentisphaera_profundi	LEfSe	I	0.0811425	0.0363262	no
A - H - I	d__Bacteria|p__Pseudomonadota|c__Gammaproteobacteria|o__Vibrionales|f__Vibrionaceae|g__Aliivibrio|s__Aliivibrio_salmonicida	LEfSe	H	0.0810528	0.00313894	no
A - H - I	d__Bacteria|p__Pseudomonadota|c__Gammaproteobacteria|o__Methylococcales|f__Methylococcaceae|g__Methylocaldum|s__Methylocaldum_szegediense	LEfSe	H	0.0808294	0.00405202	no
A - H - I	d__Bacteria|p__Pseudomonadota|c__Gammaproteobacteria|o__Enterobacterales|f__Pectobacteriaceae|g__Pectobacterium|s__Pectobacterium_carotovorum	LEfSe	H	0.0804914	0.0269194	no
A - H - I	d__Bacteria|p__Pseudomonadota|c__Alphaproteobacteria|o__Hyphomicrobiales|f__Kaistiaceae|g__Kaistia|s__Kaistia_soli	LEfSe	A	0.0800946	0.0127923	no
A - H - I	d__Bacteria|p__Pseudomonadota|c__Alphaproteobacteria|o__Rhodobacterales|f__Paracoccaceae|g__Oceanicella	LEfSe	A	0.0800493	0.0420512	no
A - H - I	d__Bacteria|p__Pseudomonadota|c__Alphaproteobacteria|o__Rhodobacterales|f__Paracoccaceae|g__Oceanicella|s__Oceanicella_actignis	LEfSe	A	0.0800493	0.0420512	no
A - H - I	d__Bacteria|p__Actinomycetota|c__Actinomycetes|o__Actinomycetales|f__Actinomycetaceae|g__Actinomyces|s__Actinomyces_haliotis	LEfSe	H	0.0799945	0.0129173	no
A - H - I	d__Bacteria|p__Pseudomonadota|c__Gammaproteobacteria|o__Aeromonadales|f__Aeromonadaceae|g__Oceanimonas|s__Oceanimonas_baumannii	LEfSe	A	0.0799539	0.0141716	no
A - H - I	d__Archaea|p__Candidatus_Woesearchaeota|c__Candidatus_Woesearchaeota_unclassified|o__Candidatus_Woesearchaeota_unclassified|f__Candidatus_Woesearchaeota_unclassified|g__Candidatus_Woesearchaeota_unclassified|s__Candidatus_Woesearchaeota_archaeon_CG10_big_fil_rev_8_21_14_0_10_32_24	LEfSe	A	0.0796839	0.0255731	no
A - H - I	d__Bacteria|p__Bacteroidota|c__Flavobacteriia|o__Flavobacteriales|f__Flavobacteriaceae|g__Aquimarina|s__Aquimarina_sp._AU474	LEfSe	A	0.0796671	0.0412231	no
A - H - I	d__Bacteria|p__Bacteroidota|c__Flavobacteriia|o__Flavobacteriales|f__Flavobacteriaceae|g__Flavobacterium|s__Flavobacterium_arcticum	LEfSe	A	0.0796622	0.0386015	no
A - H - I	d__Bacteria|p__Pseudomonadota|c__Gammaproteobacteria|o__Chromatiales|f__Ectothiorhodospiraceae|g__Thioalkalivibrio|s__Thioalkalivibrio_paradoxus	LEfSe	A	0.0795704	0.00764399	no
A - H - I	d__Bacteria|p__Candidatus_Uhrbacteria|c__Candidatus_Uhrbacteria_unclassified|o__Candidatus_Uhrbacteria_unclassified|f__Candidatus_Uhrbacteria_unclassified|g__Candidatus_Uhrbacteria_unclassified|s__Candidatus_Uhrbacteria_bacterium_RIFOXYC2_FULL_47_19	LEfSe	I	0.0795185	0.028159	no
A - H - I	d__Archaea|p__Euryarchaeota|c__Methanomicrobia|o__Methanomicrobiales|f__Methanospirillaceae|g__Methanospirillum|s__Methanospirillum_lacunae	LEfSe	H	0.0795087	0.0322517	no
A - H - I	d__Bacteria|p__Pseudomonadota|c__Alphaproteobacteria|o__Rhodospirillales|f__Rhodospirillales_unclassified|g__Rhodospirillales_unclassified|s__Rhodospirillales_bacterium_CG15_BIG_FIL_POST_REV_8_21_14_020_66_15	LEfSe	A	0.0791483	0.0468251	no
A - H - I	d__Bacteria|p__Pseudomonadota|c__Gammaproteobacteria|o__Pseudomonadales|f__Pseudomonadaceae|g__Pseudomonas|s__Pseudomonas_otitidis	LEfSe	A	0.0790615	0.030133	no
A - H - I	d__Bacteria|p__Mycoplasmatota|c__Mollicutes|o__Acholeplasmatales|f__Acholeplasmataceae|g__Candidatus_Phytoplasma|s__Candidatus_Phytoplasma_mali	LEfSe	H	0.0790604	0.0161713	no
A - H - I	d__Bacteria|p__Pseudomonadota|c__Betaproteobacteria|o__Burkholderiales|f__Comamonadaceae|g__Ramlibacter|s__Ramlibacter_montanisoli	LEfSe	I	0.0790521	0.0328586	no
A - H - I	d__Bacteria|p__Pseudomonadota|c__Gammaproteobacteria|o__Cellvibrionales|f__Cellvibrionaceae|g__Saccharophagus|s__Saccharophagus_sp._K07	LEfSe	A	0.0790333	0.0424696	no
A - H - I	d__Bacteria|p__Bacillota|c__Bacilli|o__Bacillales|f__Bacillaceae|g__Alteribacter|s__Alteribacter_aurantiacus	LEfSe	A	0.078751	0.0114884	no
A - H - I	d__Bacteria|p__Pseudomonadota|c__Alphaproteobacteria|o__Hyphomicrobiales|f__Brucellaceae|g__Brucella|s__Brucella_tritici	LEfSe	I	0.0786552	0.0152551	no
A - H - I	d__Bacteria|p__Chloroflexota|c__Dehalococcoidia|o__Dehalococcoidia_unclassified|f__Dehalococcoidia_unclassified|g__Dehalococcoidia_unclassified|s__Dehalococcoidia_bacterium_SG8_51_3	LEfSe	H	0.0786035	0.0493637	no
A - H - I	d__Bacteria|p__Bacteroidota|c__Cytophagia|o__Cytophagales|f__Hymenobacteraceae|g__Adhaeribacter|s__Adhaeribacter_arboris	LEfSe	H	0.0785659	0.0307952	no
A - H - I	d__Archaea|p__Euryarchaeota|c__Methanomicrobia|o__Methanocellales|f__Methanocellaceae|g__Methanocella|s__Methanocella_sp._PtaU1.Bin125	LEfSe	A	0.0785119	0.00429687	no
A - H - I	d__Bacteria|p__Pseudomonadota|c__Betaproteobacteria|o__Burkholderiales|f__Alcaligenaceae|g__Bordetella|s__Bordetella_pertussis	LEfSe	I	0.078339	0.030133	no
A - H - I	d__Bacteria|p__Pseudomonadota|c__Alphaproteobacteria|o__Rhodobacterales|f__Paracoccaceae|g__Pikeienuella	LEfSe	H	0.0779638	0.0253228	no
A - H - I	d__Bacteria|p__Pseudomonadota|c__Alphaproteobacteria|o__Rhodobacterales|f__Paracoccaceae|g__Pikeienuella|s__Pikeienuella_piscinae	LEfSe	H	0.0779638	0.0253228	no
A - H - I	d__Bacteria|p__Deinococcota|c__Deinococci|o__Deinococcales|f__Deinococcaceae|g__Deinococcus|s__Deinococcus_pimensis	LEfSe	A	0.0779571	0.0196146	no
A - H - I	d__Bacteria|p__Pseudomonadota|c__Alphaproteobacteria|o__Sphingomonadales|f__Erythrobacteraceae|g__Parerythrobacter|s__Parerythrobacter_aestuarii	LEfSe	A	0.077932	0.00197984	no
A - H - I	d__Bacteria|p__Pseudomonadota|c__Gammaproteobacteria|o__Oceanospirillales|f__Oceanospirillaceae|g__Marinomonas|s__Marinomonas_aquiplantarum	LEfSe	A	0.0779124	0.0318592	no
A - H - I	d__Bacteria|p__Pseudomonadota|c__Zetaproteobacteria|o__Mariprofundales|f__Mariprofundaceae|g__Mariprofundus|s__Mariprofundus_sp._EBB-1	LEfSe	A	0.0777933	0.027909	no
A - H - I	d__Bacteria|p__Bacteroidota|c__Bacteroidota_unclassified|o__Bacteroidota_unclassified|f__Bacteroidota_unclassified|g__Bacteroidota_unclassified|s__Bacteroidetes_bacterium_GWF2_41_9	LEfSe	A	0.0775015	0.0129328	no
A - H - I	d__Bacteria|p__Bacillota|c__Bacilli|o__Bacillales|f__Paenibacillaceae|g__Paenibacillus|s__Paenibacillus_sp._GM2	LEfSe	A	0.0773937	0.0176799	no
A - H - I	d__Bacteria|p__Bacillota|c__Bacilli|o__Bacillales|f__Paenibacillaceae|g__Paenibacillus|s__Paenibacillus_borealis	LEfSe	A	0.0773775	0.049498	no
A - H - I	d__Bacteria|p__Pseudomonadota|c__Betaproteobacteria|o__Burkholderiales|f__Comamonadaceae|g__Acidovorax|s__Acidovorax_sp._SRB_24	LEfSe	I	0.0773637	0.0257735	no
A - H - I	d__Bacteria|p__Pseudomonadota|c__Betaproteobacteria|o__Burkholderiales|f__Burkholderiaceae|g__Lautropia|s__Lautropia_dentalis	LEfSe	I	0.0773242	0.046515	no
A - H - I	d__Bacteria|p__Bacteroidota|c__Flavobacteriia|o__Flavobacteriales|f__Flavobacteriaceae|g__Nonlabens|s__Nonlabens_tegetincola	LEfSe	H	0.0772637	0.00102312	no
A - H - I	d__Bacteria|p__Actinomycetota|c__Actinomycetes|o__Bifidobacteriales|f__Bifidobacteriaceae|g__Pseudoscardovia|s__Pseudoscardovia_radai	LEfSe	H	0.0772196	0.0240159	no
A - H - I	d__Bacteria|p__Actinomycetota|c__Actinomycetes|o__Micrococcales|f__Promicromonosporaceae|g__Xylanimonas|s__Xylanimonas_cellulosilytica	LEfSe	H	0.0772044	0.0393334	no
A - H - I	d__Bacteria|p__Ignavibacteriota|c__Ignavibacteria|o__Ignavibacteria_unclassified|f__Ignavibacteria_unclassified|g__Ignavibacteria_unclassified|s__Ignavibacteria_bacterium_RIFOXYA2_FULL_35_9	LEfSe	A	0.0771213	0.0255862	no
A - H - I	d__Bacteria|p__Candidatus_Omnitrophota|c__Candidatus_Omnitrophota_unclassified|o__Candidatus_Omnitrophota_unclassified|f__Candidatus_Omnitrophota_unclassified|g__Candidatus_Omnitrophota_unclassified|s__Candidatus_Omnitrophica_bacterium_CG12_big_fil_rev_8_21_14_0_65_50_5	LEfSe	A	0.0771012	0.0417098	no
A - H - I	d__Bacteria|p__Bacteroidota|c__Flavobacteriia|o__Flavobacteriales|f__Flavobacteriaceae|g__Flavobacterium|s__Flavobacterium_endoglycinae	LEfSe	H	0.0769684	0.00588253	no
A - H - I	d__Bacteria|p__Spirochaetota|c__Spirochaetia|o__Spirochaetales|f__Spirochaetaceae|g__Entomospira|s__Entomospira_nematocerorum	LEfSe	H	0.0769308	0.0176799	no
A - H - I	d__Bacteria|p__Pseudomonadota|c__Alphaproteobacteria|o__Alphaproteobacteria_unclassified|f__Alphaproteobacteria_unclassified|g__Alphaproteobacteria_unclassified|s__Alphaproteobacteria_bacterium_HGW-Alphaproteobacteria-3	LEfSe	I	0.0769022	0.0272665	no
A - H - I	d__Bacteria|p__Pseudomonadota|c__Alphaproteobacteria|o__Rhodobacterales|f__Paracoccaceae|g__Cereibacter|s__Cereibacter_changlensis	LEfSe	I	0.0768192	0.022384	no
A - H - I	d__Bacteria|p__Pseudomonadota|c__Gammaproteobacteria|o__Thiotrichales|f__Thiotrichaceae|g__Thiothrix|s__Thiothrix_lacustris	LEfSe	A	0.0767566	0.0423379	no
A - H - I	d__Bacteria|p__Pseudomonadota|c__Gammaproteobacteria|o__Enterobacterales|f__Enterobacteriaceae|g__Enterobacteriaceae_unclassified	LEfSe	A	0.0763947	0.0424696	no
A - H - I	d__Bacteria|p__Bacillota|c__Bacilli|o__Bacillales|f__Bacillaceae|g__Salipaludibacillus|s__Salipaludibacillus_sp._CUR1	LEfSe	I	0.0763711	0.018462	no
A - H - I	d__Bacteria|p__Bacillota|c__Bacilli|o__Lactobacillales|f__Lactobacillaceae|g__Ligilactobacillus|s__Ligilactobacillus_ceti	LEfSe	H	0.0762762	0.0256145	no
A - H - I	d__Bacteria|p__Planctomycetota|c__Planctomycetia|o__Isosphaerales|f__Isosphaeraceae|g__Singulisphaera	LEfSe	A	0.0760707	0.0419778	no
A - H - I	d__Bacteria|p__Bacteroidota|c__Flavobacteriia|o__Flavobacteriales|f__Flavobacteriaceae|g__Flavobacterium|s__Flavobacterium_sp._LM4	LEfSe	I	0.0758767	0.0111371	no
A - H - I	d__Bacteria|p__Planctomycetota|c__Planctomycetia|o__Planctomycetales|f__Planctomycetaceae|g__Stratiformator	LEfSe	A	0.0758236	0.0275103	no
A - H - I	d__Bacteria|p__Planctomycetota|c__Planctomycetia|o__Planctomycetales|f__Planctomycetaceae|g__Stratiformator|s__Stratiformator_vulcanicus	LEfSe	A	0.0758236	0.0275103	no
A - H - I	d__Viruses|p__Uroviricota|c__Caudoviricetes|o__Caudoviricetes_unclassified|f__Herelleviridae|g__Kayvirus|s__Staphylococcus_phage_ESa2	LEfSe	A	0.0757563	0.0276361	no
A - H - I	d__Bacteria|p__Pseudomonadota|c__Alphaproteobacteria|o__Rhodospirillales|f__Acetobacteraceae|g__Acetobacter|s__Acetobacter_pomorum	LEfSe	H	0.0757463	0.0365395	no
A - H - I	d__Bacteria|p__Bacteroidota|c__Flavobacteriia|o__Flavobacteriales|f__Flavobacteriaceae|g__Flavobacterium|s__Flavobacterium_sp._JAD_PAG50586_2	LEfSe	H	0.0756525	0.0330689	no
A - H - I	d__Bacteria|p__Planctomycetota|c__Planctomycetia|o__Isosphaerales|f__Isosphaeraceae|g__Singulisphaera|s__Singulisphaera_sp._GP187	LEfSe	A	0.0755896	0.0276395	no
A - H - I	d__Bacteria|p__Planctomycetota|c__Planctomycetia|o__Pirellulales|f__Pirellulaceae|g__Mariniblastus	LEfSe	A	0.0755324	0.0328705	no
A - H - I	d__Bacteria|p__Planctomycetota|c__Planctomycetia|o__Pirellulales|f__Pirellulaceae|g__Mariniblastus|s__Mariniblastus_fucicola	LEfSe	A	0.0755324	0.0328705	no
A - H - I	d__Bacteria|p__Thermotogota|c__Thermotogae|o__Kosmotogales|f__Kosmotogaceae|g__Mesotoga|s__Mesotoga_sp._UBA5557	LEfSe	H	0.0754845	0.011051	no
A - H - I	d__Bacteria|p__Campylobacterota|c__Epsilonproteobacteria|o__Campylobacterales|f__Campylobacteraceae|g__Campylobacter|s__Campylobacter_sp._RM12651	LEfSe	H	0.0752766	0.0432016	no
A - H - I	d__Bacteria|p__Pseudomonadota|c__Gammaproteobacteria|o__Methylococcales|f__Methylococcaceae|g__Methylococcus	LEfSe	A	0.075274	0.0292854	no
A - H - I	d__Bacteria|p__Bacteroidota|c__Cytophagia|o__Cytophagales|f__Spirosomataceae|g__Dyadobacter|s__Dyadobacter_tibetensis	LEfSe	A	0.0752474	0.0127603	no
A - H - I	d__Bacteria|p__Pseudomonadota|c__Gammaproteobacteria|o__Enterobacterales|f__Enterobacteriaceae|g__Lelliottia	LEfSe	H	0.0751402	0.0107961	no
A - H - I	d__Archaea|p__Euryarchaeota|c__Methanomicrobia|o__Methanosarcinales|f__Methanosarcinaceae|g__Methanohalophilus|s__Methanohalophilus_sp.	LEfSe	H	0.0751278	0.00407568	no
A - H - I	d__Bacteria|p__Pseudomonadota|c__Alphaproteobacteria|o__Sphingomonadales|f__Erythrobacteraceae|g__Tsuneonella|s__Tsuneonella_deserti	LEfSe	I	0.0750418	0.0224691	no
A - H - I	d__Bacteria|p__Bacteroidota|c__Flavobacteriia|o__Flavobacteriales|f__Flavobacteriaceae|g__Eudoraea|s__Eudoraea_adriatica	LEfSe	A	0.0749227	0.0153426	no
A - H - I	d__Viruses|p__Uroviricota|c__Caudoviricetes|o__Caudoviricetes_unclassified|f__Caudoviricetes_unclassified|g__Caudoviricetes_unclassified|s__Myoviridae_sp._ctLx49	LEfSe	A	0.0748525	0.0472244	no
A - H - I	d__Bacteria|p__Candidatus_Komeiliibacteriota|c__Candidatus_Komeiliibacteriota_unclassified|o__Candidatus_Komeiliibacteriota_unclassified|f__Candidatus_Komeiliibacteriota_unclassified|g__Candidatus_Komeiliibacteriota_unclassified|s__Candidatus_Komeilibacteria_bacterium_RIFCSPLOWO2_02_FULL_48_11	LEfSe	I	0.0748479	0.0119881	no
A - H - I	d__Bacteria|p__Thermodesulfobacteriota|c__Desulfobulbia|o__Desulfobulbales|f__Desulfocapsaceae|g__Desulfopila|s__Desulfopila_sp._IMCC35006	LEfSe	A	0.0745725	0.0388646	no
A - H - I	d__Bacteria|p__Bacteroidota|c__Sphingobacteriia|o__Sphingobacteriales|f__Sphingobacteriaceae|g__Sphingobacterium|s__Sphingobacterium_prati	LEfSe	A	0.0745668	0.0103472	no
A - H - I	d__Bacteria|p__Actinomycetota|c__Actinomycetes|o__Mycobacteriales|f__Gordoniaceae|g__Gordonia|s__Gordonia_hirsuta	LEfSe	I	0.0744151	0.0224997	no
A - H - I	d__Bacteria|p__Candidatus_Kerfeldiibacteriota|c__Candidatus_Kerfeldiibacteriota_unclassified|o__Candidatus_Kerfeldiibacteriota_unclassified|f__Candidatus_Kerfeldiibacteriota_unclassified|g__Candidatus_Kerfeldiibacteriota_unclassified|s__Candidatus_Kerfeldbacteria_bacterium_CG08_land_8_20_14_0_20_43_14	LEfSe	I	0.0743377	0.0395418	no
A - H - I	d__Bacteria|p__Deinococcota|c__Deinococci|o__Thermales|f__Thermaceae|g__Thermus|s__Thermus_filiformis	LEfSe	A	0.0742649	0.0417109	no
A - H - I	d__Bacteria|p__Pseudomonadota|c__Gammaproteobacteria|o__Alteromonadales|f__Pseudoalteromonadaceae|g__Psychrosphaera|s__uncultured_Psychrosphaera_sp.	LEfSe	A	0.0739807	0.0448677	no
A - H - I	d__Bacteria|p__Actinomycetota|c__Coriobacteriia|o__Eggerthellales|f__Eggerthellaceae|g__Slackia|s__Slackia_sp._NATTS	LEfSe	I	0.0739268	0.0187924	no
A - H - I	d__Bacteria|p__Fusobacteriota|c__Fusobacteriia|o__Fusobacteriales|f__Fusobacteriaceae|g__Fusobacterium|s__Fusobacterium_sp._HMSC073F01	LEfSe	H	0.0739257	0.019999	no
A - H - I	d__Bacteria|p__Bacteria_unclassified|c__Deltaproteobacteria|o__Deltaproteobacteria_unclassified|f__Deltaproteobacteria_unclassified|g__Deltaproteobacteria_unclassified|s__Deltaproteobacteria_bacterium_RBG_16_47_11	LEfSe	A	0.0737932	0.0177005	no
A - H - I	d__Bacteria|p__Bacillota|c__Bacilli|o__Bacillales|f__Bacillaceae|g__Lentibacillus|s__Lentibacillus_lipolyticus	LEfSe	A	0.0737523	0.0386615	no
A - H - I	d__Bacteria|p__Actinomycetota|c__Actinomycetota_unclassified|o__Actinomycetota_unclassified|f__Actinomycetota_unclassified|g__Actinomycetota_unclassified|s__Actinobacteria_bacterium_13_1_20CM_3_68_9	LEfSe	A	0.0736948	0.0298374	no
A - H - I	d__Bacteria|p__Bacillota|c__Bacilli|o__Bacillales|f__Bacillaceae|g__Terribacillus|s__Terribacillus_unclassified	LEfSe	A	0.0735317	0.0142579	no
A - H - I	d__Bacteria|p__Bacillota|c__Bacilli|o__Lactobacillales|f__Lactobacillaceae|g__Pediococcus|s__Pediococcus_argentinicus	LEfSe	A	0.0734871	0.018462	no
A - H - I	d__Bacteria|p__Bacteroidota|c__Flavobacteriia|o__Flavobacteriales|f__Flavobacteriaceae|g__Flavivirga|s__Flavivirga_amylovorans	LEfSe	A	0.07339	0.0172291	no
A - H - I	d__Bacteria|p__Thermodesulfobacteriota|c__Desulfobacteria|o__Desulfobacterales|f__Desulfobacteraceae|g__Desulfobacteraceae_unclassified|s__Desulfobacteraceae_bacterium_CG2_30_51_40	LEfSe	A	0.0732954	0.025545	no
A - H - I	d__Bacteria|p__Candidatus_Kaiserbacteria|c__Candidatus_Kaiserbacteria_unclassified|o__Candidatus_Kaiserbacteria_unclassified|f__Candidatus_Kaiserbacteria_unclassified|g__Candidatus_Kaiserbacteria_unclassified|s__Candidatus_Kaiserbacteria_bacterium_RIFCSPHIGHO2_01_FULL_54_36b	LEfSe	H	0.0732383	0.0127668	no
A - H - I	d__Bacteria|p__Pseudomonadota|c__Alphaproteobacteria|o__Rhodobacterales|f__Roseobacteraceae|g__Octadecabacter	LEfSe	A	0.0731806	0.0419778	no
A - H - I	d__Bacteria|p__Myxococcota|c__Myxococcota_unclassified|o__Polyangiales|f__Polyangiaceae|g__Minicystis	LEfSe	A	0.0731337	0.0421657	no
A - H - I	d__Bacteria|p__Myxococcota|c__Myxococcota_unclassified|o__Polyangiales|f__Polyangiaceae|g__Minicystis|s__Minicystis_rosea	LEfSe	A	0.0731337	0.0421657	no
A - H - I	d__Bacteria|p__Acidobacteriota|c__Acidobacteriota_unclassified|o__Acidobacteriota_unclassified|f__Acidobacteriota_unclassified|g__Acidobacteriota_unclassified|s__Acidobacteria_bacterium_RBG_16_64_8	LEfSe	A	0.0730886	0.0469659	no
A - H - I	d__Bacteria|p__Pseudomonadota|c__Alphaproteobacteria|o__Hyphomicrobiales|f__Hyphomicrobiaceae|g__Hyphomicrobium|s__Hyphomicrobium_sp._32-62-53	LEfSe	A	0.073088	0.0403247	no
A - H - I	d__Bacteria|p__Bacteroidota|c__Flavobacteriia|o__Flavobacteriales|f__Weeksellaceae|g__Chryseobacterium|s__Chryseobacterium_formosus	LEfSe	I	0.0726255	0.0093947	no
A - H - I	d__Bacteria|p__Pseudomonadota|c__Alphaproteobacteria|o__Rhodospirillales|f__Rhodospirillaceae|g__Rhodospirillaceae_unclassified|s__Rhodospirillaceae_bacterium_TMED140	LEfSe	A	0.0725306	0.00495642	no
A - H - I	d__Bacteria|p__Candidatus_Kaiserbacteria|c__Candidatus_Kaiserbacteria_unclassified|o__Candidatus_Kaiserbacteria_unclassified|f__Candidatus_Kaiserbacteria_unclassified|g__Candidatus_Kaiserbacteria_unclassified|s__Candidatus_Kaiserbacteria_bacterium_RIFCSPHIGHO2_01_FULL_49_13	LEfSe	A	0.0725002	0.00715852	no
A - H - I	d__Bacteria|p__Pseudomonadota|c__Alphaproteobacteria|o__Hyphomicrobiales|f__Xanthobacteraceae|g__Aquabacter	LEfSe	A	0.0724798	0.034943	no
A - H - I	d__Bacteria|p__Bacteroidota|c__Chitinophagia|o__Chitinophagales|f__Chitinophagaceae|g__Flavihumibacter|s__Flavihumibacter_fluminis	LEfSe	I	0.0723751	0.00655835	no
A - H - I	d__Viruses|p__Uroviricota|c__Caudoviricetes|o__Caudoviricetes_unclassified|f__Caudoviricetes_unclassified|g__Caudoviricetes_unclassified|s__Bacteroides_phage_DAC16	LEfSe	A	0.0723414	0.0358395	no
A - H - I	d__Bacteria|p__Actinomycetota|c__Actinomycetes|o__Micrococcales|f__Intrasporangiaceae|g__Janibacter	LEfSe	H	0.0722537	0.0332449	no
A - H - I	d__Bacteria|p__Pseudomonadota|c__Gammaproteobacteria|o__Pseudomonadales|f__Pseudomonadaceae|g__Pseudomonas|s__Pseudomonas_sp._HLS-6	LEfSe	H	0.0722534	0.0129996	no
A - H - I	d__Bacteria|p__Actinomycetota|c__Actinomycetes|o__Bifidobacteriales|f__Bifidobacteriaceae|g__Bifidobacterium|s__Bifidobacterium_sp._M0353	LEfSe	A	0.0722491	0.0354898	no
A - H - I	d__Bacteria|p__Bacillota|c__Bacilli|o__Lactobacillales|f__Carnobacteriaceae|g__Alkalibacterium|s__Alkalibacterium_kapii	LEfSe	H	0.07221	0.0422312	no
A - H - I	d__Bacteria|p__Pseudomonadota|c__Alphaproteobacteria|o__Rhodospirillales|f__Azospirillaceae|g__Azospirillum|s__Azospirillum_sp._TSO35-2	LEfSe	A	0.0720445	0.0417098	no
A - H - I	d__Bacteria|p__Candidatus_Berkelbacteria|c__Candidatus_Berkelbacteria_unclassified|o__Candidatus_Berkelbacteria_unclassified|f__Candidatus_Berkelbacteria_unclassified|g__Candidatus_Berkelbacteria_unclassified|s__Berkelbacteria_bacterium_GW2011_GWA1_36_9	LEfSe	H	0.072037	0.0486686	no
A - H - I	d__Viruses|p__Uroviricota|c__Caudoviricetes|o__Caudoviricetes_unclassified|f__Caudoviricetes_unclassified|g__Caudoviricetes_unclassified|s__Siphoviridae_sp._ct4Rk11	LEfSe	H	0.0719162	0.0481243	no
A - H - I	d__Bacteria|p__Pseudomonadota|c__Alphaproteobacteria|o__Hyphomicrobiales|f__Ancalomicrobiaceae|g__Siculibacillus	LEfSe	A	0.0716424	0.00993682	no
A - H - I	d__Bacteria|p__Pseudomonadota|c__Alphaproteobacteria|o__Hyphomicrobiales|f__Ancalomicrobiaceae|g__Siculibacillus|s__Siculibacillus_lacustris	LEfSe	A	0.0716424	0.00993682	no
A - H - I	d__Bacteria|p__Campylobacterota|c__Epsilonproteobacteria|o__Campylobacterales|f__Campylobacteraceae|g__Campylobacteraceae_unclassified|s__Campylobacteraceae_bacterium_4484_166	LEfSe	A	0.0715304	0.0115029	no
A - H - I	d__Bacteria|p__Ignavibacteriota|c__Ignavibacteria|o__Ignavibacteria_unclassified|f__Ignavibacteria_unclassified|g__Ignavibacteria_unclassified|s__Ignavibacteria_bacterium_CG_4_9_14_3_um_filter_36_18	LEfSe	A	0.0714227	0.00572981	no
A - H - I	d__Bacteria|p__Actinomycetota|c__Actinomycetes|o__Bifidobacteriales|f__Bifidobacteriaceae|g__Alloscardovia|s__Alloscardovia_macacae	LEfSe	A	0.0713838	0.0398887	no
A - H - I	d__Bacteria|p__Pseudomonadota|c__Gammaproteobacteria|o__Chromatiales|f__Ectothiorhodospiraceae|g__Thiorhodospira	LEfSe	I	0.0713755	0.00814334	no
A - H - I	d__Bacteria|p__Pseudomonadota|c__Gammaproteobacteria|o__Chromatiales|f__Ectothiorhodospiraceae|g__Thiorhodospira|s__Thiorhodospira_sibirica	LEfSe	I	0.0713755	0.00814334	no
A - H - I	d__Bacteria|p__Bacteroidota|c__Flavobacteriia|o__Flavobacteriales|f__Weeksellaceae|g__Chryseobacterium|s__Chryseobacterium_limigenitum	LEfSe	I	0.0711397	0.0122063	no
A - H - I	d__Bacteria|p__Chloroflexota|c__Chloroflexota_unclassified|o__Chloroflexota_unclassified|f__Chloroflexota_unclassified|g__Chloroflexota_unclassified|s__Chloroflexi_bacterium_RBG_19FT_COMBO_49_13	LEfSe	H	0.0711253	0.0124973	no
A - H - I	d__Bacteria|p__Pseudomonadota|c__Alphaproteobacteria|o__Sphingomonadales|f__Sphingomonadaceae|g__Sphingomonas|s__Sphingomonas_nostoxanthinifaciens	LEfSe	I	0.0710268	0.034309	no
A - H - I	d__Bacteria|p__Bacillota|c__Bacilli|o__Bacillales|f__Planococcaceae|g__Planococcus|s__Planococcus_beigongshangi	LEfSe	H	0.07098	0.0251612	no
A - H - I	d__Bacteria|p__Candidatus_Nomurabacteria|c__Candidatus_Nomurabacteria_unclassified|o__Candidatus_Nomurabacteria_unclassified|f__Candidatus_Nomurabacteria_unclassified|g__Candidatus_Nomurabacteria_unclassified|s__Candidatus_Nomurabacteria_bacterium_RIFOXYA1_FULL_35_17	LEfSe	I	0.0709701	0.0319957	no
A - H - I	d__Bacteria|p__Bacillota|c__Clostridia|o__Lachnospirales|f__Lachnospiraceae|g__Lachnospiraceae_unclassified|s__Lachnospiraceae_bacterium_AM10-38	LEfSe	H	0.070898	0.007925	no
A - H - I	d__Archaea|p__Euryarchaeota|c__Methanomicrobia|o__Methanomicrobiales|f__Methanomicrobiaceae|g__Methanofollis|s__Methanofollis_sp.	LEfSe	H	0.070876	0.031904	no
A - H - I	d__Bacteria|p__Thermodesulfobacteriota|c__Desulfovibrionia|o__Desulfovibrionales|f__Desulfovibrionaceae|g__Desulfovibrio|s__Desulfovibrio_sp._UCD-KL4C	LEfSe	H	0.0708698	0.00561531	no
A - H - I	d__Bacteria|p__Pseudomonadota|c__Alphaproteobacteria|o__Hyphomicrobiales|f__Afifellaceae|g__Faunimonas	LEfSe	A	0.0708661	0.0239788	no
A - H - I	d__Bacteria|p__Pseudomonadota|c__Alphaproteobacteria|o__Hyphomicrobiales|f__Afifellaceae|g__Faunimonas|s__Faunimonas_pinastri	LEfSe	A	0.0708661	0.0239788	no
A - H - I	d__Bacteria|p__Bdellovibrionota|c__Bacteriovoracia|o__Bacteriovoracales|f__Bacteriovoracaceae|g__Bacteriovorax|s__Bacteriovorax_sp._HI3	LEfSe	A	0.0708117	0.0432684	no
A - H - I	d__Bacteria|p__Campylobacterota|c__Epsilonproteobacteria|o__Campylobacterales|f__Sulfurovaceae|g__Sulfurovum|s__Sulfurovum_lithotrophicum	LEfSe	A	0.0708023	0.0120065	no
A - H - I	d__Bacteria|p__Pseudomonadota|c__Alphaproteobacteria|o__Rhodobacterales|f__Roseobacteraceae|g__Celeribacter|s__Celeribacter_halophilus	LEfSe	A	0.0707798	0.0300221	no
A - H - I	d__Bacteria|p__Pseudomonadota|c__Gammaproteobacteria|o__Enterobacterales|f__Enterobacteriaceae|g__Citrobacter|s__Citrobacter_sp._FDAARGOS_156	LEfSe	I	0.0707467	0.0459933	no
A - H - I	d__Bacteria|p__Bacteroidota|c__Bacteroidota_unclassified|o__Bacteroidota_unclassified|f__Bacteroidota_unclassified|g__Bacteroidota_unclassified|s__Bacteroidetes_bacterium_MED-G20	LEfSe	A	0.0707319	0.0202372	no
A - H - I	d__Bacteria|p__Bacteroidota|c__Cytophagia|o__Cytophagales|f__Fulvivirgaceae|g__Fulvivirga|s__Fulvivirga_aurantia	LEfSe	H	0.0706253	0.0335148	no
A - H - I	d__Bacteria|p__Pseudomonadota|c__Alphaproteobacteria|o__Parvularculales|f__Parvularculaceae|g__Parvularcula|s__Parvularcula_oceani	LEfSe	A	0.0705447	0.00992235	no
A - H - I	d__Viruses|p__Phixviricota|c__Malgrandaviricetes|o__Petitvirales|f__Microviridae|g__Microvirus|s__Chicken_microvirus_mg8_41	LEfSe	I	0.0705142	0.0200404	no
A - H - I	d__Bacteria|p__Thermotogota|c__Thermotogae|o__Thermotogales|f__Fervidobacteriaceae|g__Fervidobacterium|s__Fervidobacterium_sp.	LEfSe	H	0.070442	0.0324395	no
A - H - I	d__Bacteria|p__Pseudomonadota|c__Gammaproteobacteria|o__Chromatiales|f__Wenzhouxiangellaceae|g__Wenzhouxiangellaceae_unclassified	LEfSe	A	0.0704341	0.0109655	no
A - H - I	d__Bacteria|p__Pseudomonadota|c__Gammaproteobacteria|o__Chromatiales|f__Wenzhouxiangellaceae|g__Wenzhouxiangellaceae_unclassified|s__Wenzhouxiangellaceae_bacterium	LEfSe	A	0.0704341	0.0109655	no
A - H - I	d__Bacteria|p__Bacteroidota|c__Flavobacteriia|o__Flavobacteriales|f__Flavobacteriaceae|g__Robiginitalea|s__Robiginitalea_aurantiaca	LEfSe	H	0.0703829	0.0262691	no
A - H - I	d__Bacteria|p__Bacillota|c__Bacilli|o__Lactobacillales|f__Aerococcaceae|g__Abiotrophia|s__Abiotrophia_unclassified	LEfSe	A	0.0701909	0.00985451	no
A - H - I	d__Bacteria|p__Pseudomonadota|c__Betaproteobacteria|o__Burkholderiales|f__Comamonadaceae|g__Brachymonas|s__Brachymonas_unclassified	LEfSe	A	0.0701729	0.0250387	no
A - H - I	d__Bacteria|p__Pseudomonadota|c__Betaproteobacteria|o__Neisseriales|f__Neisseriaceae|g__Neisseria|s__Neisseria_yangbaofengii	LEfSe	H	0.070063	0.0372111	no
A - H - I	d__Bacteria|p__Bacteroidota|c__Cytophagia|o__Cytophagales|f__Spirosomataceae|g__Telluribacter|s__Telluribacter_humicola	LEfSe	I	0.0700221	0.00688192	no
A - H - I	d__Bacteria|p__Bacteroidota|c__Flavobacteriia|o__Flavobacteriales|f__Flavobacteriaceae|g__Winogradskyella|s__Winogradskyella_pacifica	LEfSe	H	0.0699966	0.0392647	no
A - H - I	d__Bacteria|p__Bacillota|c__Bacilli|o__Bacillales|f__Paenibacillaceae|g__Paenibacillus|s__Paenibacillus_alkaliterrae	LEfSe	A	0.0699843	0.0300221	no
A - H - I	d__Bacteria|p__Pseudomonadota|c__Gammaproteobacteria|o__Cellvibrionales|f__Cellvibrionaceae|g__Teredinibacter|s__Teredinibacter_turnerae	LEfSe	H	0.069721	0.0225609	no
A - H - I	d__Bacteria|p__Pseudomonadota|c__Gammaproteobacteria|o__Enterobacterales|f__Pectobacteriaceae|g__Dickeya|s__Dickeya_chrysanthemi	LEfSe	H	0.069654	0.0186891	no
A - H - I	d__Bacteria|p__Pseudomonadota|c__Gammaproteobacteria|o__Pseudomonadales|f__Pseudomonadaceae|g__Pseudomonas|s__Pseudomonas_sp._Ga0074129	LEfSe	I	0.06965	0.0177687	no
A - H - I	d__Bacteria|p__Pseudomonadota|c__Alphaproteobacteria|o__Maricaulales|f__Robiginitomaculaceae|g__Algimonas|s__Algimonas_porphyrae	LEfSe	A	0.0696238	0.0324791	no
A - H - I	d__Bacteria|p__Pseudomonadota|c__Gammaproteobacteria|o__Oceanospirillales|f__Oceanospirillaceae|g__Nitrincola|s__Nitrincola_alkalilacustris	LEfSe	A	0.0695634	0.0115352	no
A - H - I	d__Bacteria|p__Pseudomonadota|c__Gammaproteobacteria|o__Lysobacterales|f__Rhodanobacteraceae|g__Rhodanobacter|s__Rhodanobacter_sp._67-28	LEfSe	I	0.0691445	0.0323846	no
A - H - I	d__Bacteria|p__Pseudomonadota|c__Gammaproteobacteria|o__Enterobacterales|f__Morganellaceae|g__Providencia|s__Providencia_sp._PROV197	LEfSe	I	0.0690812	0.0465421	no
A - H - I	d__Bacteria|p__Pseudomonadota|c__Betaproteobacteria|o__Burkholderiales|f__Burkholderiaceae|g__Paraburkholderia|s__Paraburkholderia_sacchari	LEfSe	I	0.0690149	0.0494396	no
A - H - I	d__Bacteria|p__Bacteroidota|c__Flavobacteriia|o__Flavobacteriales|f__Weeksellaceae|g__Chryseobacterium|s__Chryseobacterium_cheonjiense	LEfSe	H	0.0689118	0.0253279	no
A - H - I	d__Bacteria|p__Bacillota|c__Bacilli|o__Bacillales|f__Bacillaceae|g__Peribacillus|s__Peribacillus_sp._R9-11	LEfSe	A	0.0688712	0.0117184	no
A - H - I	d__Bacteria|p__Cyanobacteriota|c__Cyanophyceae|o__Nodosilineales|f__Nodosilineaceae|g__Nodosilinea	LEfSe	H	0.0688071	0.0160292	no
A - H - I	d__Bacteria|p__Actinomycetota|c__Coriobacteriia|o__Eggerthellales|f__Eggerthellaceae|g__Adlercreutzia|s__Adlercreutzia_hattorii	LEfSe	H	0.0687989	0.0278416	no
A - H - I	d__Bacteria|p__Actinomycetota|c__Actinomycetes|o__Pseudonocardiales|f__Pseudonocardiaceae|g__Pseudonocardia|s__Pseudonocardia_sp._73-21	LEfSe	I	0.0686411	0.045613	no
A - H - I	d__Bacteria|p__Pseudomonadota|c__Alphaproteobacteria|o__Hyphomicrobiales|f__Hyphomicrobiaceae|g__Rhodoplanes|s__Rhodoplanes_serenus	LEfSe	H	0.0684153	0.00346453	no
A - H - I	d__Bacteria|p__Bacillota|c__Bacilli|o__Bacillales|f__Paenibacillaceae|g__Paenibacillus|s__Paenibacillus_sp._7516	LEfSe	A	0.0683397	0.0428421	no
A - H - I	d__Bacteria|p__Bacteroidota|c__Flavobacteriia|o__Flavobacteriales|f__Flavobacteriaceae|g__Allomuricauda|s__Muricauda_sp._CP2A	LEfSe	A	0.0683066	0.0261013	no
A - H - I	d__Bacteria|p__Myxococcota|c__Myxococcota_unclassified|o__Polyangiales|f__Labilitrichaceae	LEfSe	A	0.0683024	0.0192824	no
A - H - I	d__Bacteria|p__Myxococcota|c__Myxococcota_unclassified|o__Polyangiales|f__Labilitrichaceae|g__Labilithrix	LEfSe	A	0.0683024	0.0192824	no
A - H - I	d__Bacteria|p__Myxococcota|c__Myxococcota_unclassified|o__Polyangiales|f__Labilitrichaceae|g__Labilithrix|s__Labilithrix_luteola	LEfSe	A	0.0683024	0.0192824	no
A - H - I	d__Bacteria|p__Candidatus_Desantisbacteria|c__Candidatus_Desantisbacteria_unclassified|o__Candidatus_Desantisbacteria_unclassified|f__Candidatus_Desantisbacteria_unclassified|g__Candidatus_Desantisbacteria_unclassified|s__Candidatus_Desantisbacteria_bacterium_CG02_land_8_20_14_3_00_49_13	LEfSe	H	0.0682609	0.0398268	no
A - H - I	d__Bacteria|p__Pseudomonadota|c__Alphaproteobacteria|o__Hyphomicrobiales|f__Hyphomicrobiaceae|g__Hyphomicrobium|s__Hyphomicrobium_album	LEfSe	A	0.0680957	0.00702235	no
A - H - I	d__Bacteria|p__Pseudomonadota|c__Gammaproteobacteria|o__Chromatiales|f__Ectothiorhodospiraceae|g__Acidihalobacter|s__Acidihalobacter_prosperus	LEfSe	A	0.0680575	0.00667093	no
A - H - I	d__Bacteria|p__Pseudomonadota|c__Gammaproteobacteria|o__Alteromonadales|f__Shewanellaceae|g__Shewanella|s__Shewanella_khirikhana	LEfSe	I	0.0680509	0.0319957	no
A - H - I	d__Bacteria|p__Pseudomonadota|c__Alphaproteobacteria|o__Hyphomicrobiales|f__Beijerinckiaceae|g__Beijerinckia|s__Beijerinckia_indica	LEfSe	A	0.0679539	0.0103512	no
A - H - I	d__Bacteria|p__Candidatus_Peregrinibacteria|c__Candidatus_Peregrinibacteria_unclassified|o__Candidatus_Peregrinibacteria_unclassified|f__Candidatus_Peregrinibacteria_unclassified|g__Candidatus_Peregrinibacteria_unclassified|s__Candidatus_Peregrinibacteria_bacterium_GW2011_GWF2_43_17	LEfSe	I	0.0679108	0.00318935	no
A - H - I	d__Bacteria|p__Pseudomonadota|c__Gammaproteobacteria|o__Gammaproteobacteria_unclassified|f__Gammaproteobacteria_unclassified|g__Gammaproteobacteria_unclassified|s__gamma_proteobacterium_IMCC2047	LEfSe	I	0.0677409	0.0280703	no
A - H - I	d__Bacteria|p__Bacillota|c__Bacilli|o__Lactobacillales|f__Lactobacillaceae|g__Lentilactobacillus|s__Lentilactobacillus_kefiri	LEfSe	I	0.0676586	0.0453316	no
A - H - I	d__Bacteria|p__Bacillota|c__Bacilli|o__Bacillales|f__Paenibacillaceae|g__Paenibacillus|s__Paenibacillus_sp._CC-CFT742	LEfSe	A	0.0675278	0.0449667	no
A - H - I	d__Bacteria|p__Bacteroidota|c__Flavobacteriia|o__Flavobacteriales|f__Flavobacteriaceae|g__Flavicella|s__Flavicella_sediminum	LEfSe	H	0.0674179	0.000917705	no
A - H - I	d__Bacteria|p__Pseudomonadota|c__Gammaproteobacteria|o__Methylococcales|f__Methylococcales_unclassified|g__Methylococcales_unclassified	LEfSe	A	0.0673815	0.0441956	no
A - H - I	d__Bacteria|p__Pseudomonadota|c__Gammaproteobacteria|o__Methylococcales|f__Methylococcales_unclassified|g__Methylococcales_unclassified|s__Methylococcales_bacterium	LEfSe	A	0.0673815	0.0441956	no
A - H - I	d__Bacteria|p__Pseudomonadota|c__Gammaproteobacteria|o__Orbales|f__Orbaceae|g__Gilliamella|s__Gilliamella_sp._wkB72	LEfSe	A	0.0673677	0.0163846	no
A - H - I	d__Bacteria|p__Pseudomonadota|c__Alphaproteobacteria|o__Rhodospirillales|f__Acetobacteraceae|g__Neoroseomonas|s__Neoroseomonas_eburnea	LEfSe	A	0.0673639	0.00316697	no
A - H - I	d__Bacteria|p__Pseudomonadota|c__Gammaproteobacteria|o__Chromatiales|f__Chromatiaceae|g__Rheinheimera|s__Rheinheimera_pleomorphica	LEfSe	I	0.0672197	0.0349209	no
A - H - I	d__Bacteria|p__Pseudomonadota|c__Gammaproteobacteria|o__Chromatiales|f__Thioalkalibacteraceae	LEfSe	H	0.0671984	0.0361643	no
A - H - I	d__Bacteria|p__Pseudomonadota|c__Gammaproteobacteria|o__Chromatiales|f__Thioalkalibacteraceae|g__Guyparkeria	LEfSe	H	0.0671984	0.0361643	no
A - H - I	d__Bacteria|p__Actinomycetota|c__Actinomycetes|o__Streptosporangiales|f__Thermomonosporaceae|g__Actinocorallia	LEfSe	A	0.0671622	0.0231134	no
A - H - I	d__Bacteria|p__Pseudomonadota|c__Alphaproteobacteria|o__Parvularculales|f__Parvularculaceae|g__Parvularcula|s__Parvularcula_marina	LEfSe	A	0.0670892	0.0292636	no
A - H - I	d__Bacteria|p__Bacteroidota|c__Flavobacteriia|o__Flavobacteriales|f__Weeksellaceae|g__Chryseobacterium|s__Chryseobacterium_sp._SCN_40-13	LEfSe	H	0.0670511	0.0358483	no
A - H - I	d__Bacteria|p__Pseudomonadota|c__Gammaproteobacteria|o__Enterobacterales|f__Morganellaceae|g__Proteus|s__Proteus_sp._G2675	LEfSe	A	0.0669881	0.0441439	no
A - H - I	d__Bacteria|p__Planctomycetota|c__Planctomycetia|o__Pirellulales|f__Pirellulaceae|g__Roseiconus	LEfSe	A	0.0668301	0.0382732	no
A - H - I	d__Bacteria|p__Bacillota|c__Bacilli|o__Bacillales|f__Bacillaceae|g__Mangrovibacillus	LEfSe	I	0.0666852	0.0118048	no
A - H - I	d__Bacteria|p__Bacillota|c__Bacilli|o__Bacillales|f__Bacillaceae|g__Mangrovibacillus|s__Mangrovibacillus_cuniculi	LEfSe	I	0.0666852	0.0118048	no
A - H - I	d__Bacteria|p__Pseudomonadota|c__Alphaproteobacteria|o__Hyphomicrobiales|f__Methylobacteriaceae|g__Methylobacterium|s__Methylobacterium_sp._Leaf118	LEfSe	A	0.0666847	0.0461858	no
A - H - I	d__Bacteria|p__Pseudomonadota|c__Alphaproteobacteria|o__Sphingomonadales|f__Erythrobacteraceae|g__Aurantiacibacter|s__Aurantiacibacter_arachoides	LEfSe	A	0.0666792	0.00427199	no
A - H - I	d__Bacteria|p__Bacillota|c__Bacilli|o__Lactobacillales|f__Lactobacillaceae|g__Companilactobacillus|s__Companilactobacillus_nuruki	LEfSe	I	0.0665442	0.0385312	no
A - H - I	d__Bacteria|p__Bacillota|c__Bacilli|o__Lactobacillales|f__Streptococcaceae|g__Streptococcaceae_unclassified|s__Streptococcaceae_bacterium_ESL0729	LEfSe	H	0.0664295	0.0468251	no
A - H - I	d__Bacteria|p__Thermodesulfobacteriota|c__Desulfuromonadia|o__Desulfuromonadales|f__Desulfuromonadales_unclassified|g__Desulfuromonadales_unclassified|s__Desulfuromonadales_bacterium_C00003096	LEfSe	I	0.0664265	0.0462291	no
A - H - I	d__Bacteria|p__Actinomycetota|c__Actinomycetes|o__Actinomycetales|f__Actinomycetaceae|g__Trueperella|s__Trueperella_bialowiezensis	LEfSe	A	0.0664248	0.0182766	no
A - H - I	d__Bacteria|p__Pseudomonadota|c__Alphaproteobacteria|o__Rhodospirillales|f__Acetobacteraceae|g__Acidisoma|s__Acidisoma_unclassified	LEfSe	A	0.0662418	0.0413833	no
A - H - I	d__Bacteria|p__Bacteroidota|c__Flavobacteriia|o__Flavobacteriales|f__Flavobacteriaceae|g__Psychroserpens|s__Psychroserpens_algicola	LEfSe	H	0.0662348	0.00665089	no
A - H - I	d__Bacteria|p__Bacteroidota|c__Cytophagia|o__Cytophagales|f__Hymenobacteraceae|g__Pontibacter|s__Pontibacter_sp._E15-1	LEfSe	I	0.0661542	0.0397188	no
A - H - I	d__Bacteria|p__Pseudomonadota|c__Alphaproteobacteria|o__Hyphomicrobiales|f__Methylobacteriaceae|g__Methylobacterium|s__Methylobacterium_nodulans	LEfSe	A	0.0660278	0.0443477	no
A - H - I	d__Bacteria|p__Bacteroidota|c__Flavobacteriia|o__Flavobacteriales|f__Flavobacteriaceae|g__Cellulophaga|s__Cellulophaga_omnivescoria	LEfSe	A	0.065991	0.00722738	no
A - H - I	d__Bacteria|p__Actinomycetota|c__Actinomycetes|o__Kitasatosporales|f__Streptomycetaceae|g__Streptomyces|s__Streptomyces_telluris	LEfSe	A	0.0659761	0.0354898	no
A - H - I	d__Bacteria|p__Pseudomonadota|c__Gammaproteobacteria|o__Chromatiales|f__Ectothiorhodospiraceae|g__Spiribacter|s__Spiribacter_salilacus	LEfSe	H	0.0658915	0.00899765	no
A - H - I	d__Bacteria|p__Pseudomonadota|c__Gammaproteobacteria|o__Oceanospirillales|f__Halomonadaceae|g__Halomonas|s__Halomonas_cupida	LEfSe	A	0.0657449	0.017704	no
A - H - I	d__Bacteria|p__Pseudomonadota|c__Alphaproteobacteria|o__Hyphomicrobiales|f__Rhizobiaceae|g__Neorhizobium|s__Neorhizobium_turbinariae	LEfSe	A	0.0657418	0.0250776	no
A - H - I	d__Bacteria|p__Pseudomonadota|c__Alphaproteobacteria|o__Alphaproteobacteria_unclassified|f__Alphaproteobacteria_unclassified|g__Alphaproteobacteria_unclassified|s__Alphaproteobacteria_bacterium_HGW-Alphaproteobacteria-8	LEfSe	A	0.0654383	0.0202376	no
A - H - I	d__Bacteria|p__Pseudomonadota|c__Alphaproteobacteria|o__Hyphomicrobiales|f__Hyphomicrobiaceae|g__Hyphomicrobium|s__Hyphomicrobium_unclassified	LEfSe	A	0.0653393	0.0299192	no
A - H - I	d__Bacteria|p__Bacillota|c__Bacilli|o__Lactobacillales|f__Aerococcaceae|g__Vaginisenegalia	LEfSe	A	0.0651948	0.0313014	no
A - H - I	d__Bacteria|p__Bacillota|c__Bacilli|o__Lactobacillales|f__Aerococcaceae|g__Vaginisenegalia|s__Vaginisenegalia_massiliensis	LEfSe	A	0.0651948	0.0313014	no
A - H - I	d__Bacteria|p__Candidatus_Rokuibacteriota|c__Candidatus_Rokuibacteriota_unclassified|o__Candidatus_Rokuibacteriota_unclassified|f__Candidatus_Rokuibacteriota_unclassified|g__Candidatus_Rokuibacteriota_unclassified|s__Candidatus_Rokubacteria_bacterium_RIFCSPLOWO2_02_FULL_72_37	LEfSe	A	0.0651871	0.0373024	no
A - H - I	d__Bacteria|p__Bacillota|c__Negativicutes|o__Veillonellales|f__Veillonellaceae|g__Megasphaera|s__Megasphaera_sp._SC8-1	LEfSe	I	0.0650332	0.0382115	no
A - H - I	d__Bacteria|p__Bacteroidota|c__Flavobacteriia|o__Flavobacteriales|f__Weeksellaceae|g__Chryseobacterium|s__Chryseobacterium_sp._WG23	LEfSe	H	0.0649422	0.00963201	no
A - H - I	d__Bacteria|p__Bacillota|c__Bacilli|o__Bacillales|f__Bacillaceae|g__Bacillus|s__Bacillus_sp._E(2018)	LEfSe	A	0.0648145	0.0256994	no
A - H - I	d__Viruses|p__Uroviricota|c__Caudoviricetes|o__Caudoviricetes_unclassified|f__Caudoviricetes_unclassified|g__Caudoviricetes_unclassified|s__Siphoviridae_sp._ct6bb17	LEfSe	A	0.0646571	0.0257678	no
A - H - I	d__Bacteria|p__Bacteroidota|c__Flavobacteriia|o__Flavobacteriales|f__Flavobacteriaceae|g__Polaribacter|s__Polaribacter_sp._ALD11	LEfSe	H	0.0646385	0.0071038	no
A - H - I	d__Bacteria|p__Actinomycetota|c__Actinomycetes|o__Propionibacteriales|f__Propionibacteriaceae|g__Tessaracoccus|s__Tessaracoccus_unclassified	LEfSe	H	0.064618	0.0287838	no
A - H - I	d__Bacteria|p__Bacillota|c__Bacilli|o__Bacillales|f__Paenibacillaceae|g__Paenibacillus|s__Paenibacillus_lacisoli	LEfSe	A	0.0644892	0.0100288	no
A - H - I	d__Bacteria|p__Bacteroidota|c__Flavobacteriia|o__Flavobacteriales|f__Flavobacteriaceae|g__Pricia|s__Pricia_mediterranea	LEfSe	I	0.0643835	0.0140281	no
A - H - I	d__Archaea|p__Euryarchaeota|c__Methanobacteria|o__Methanobacteriales|f__Methanobacteriaceae|g__Methanobacterium|s__Methanobacterium_congolense	LEfSe	A	0.0643535	0.00744995	no
A - H - I	d__Bacteria|p__Bacillota|c__Bacilli|o__Bacillales|f__Bacillaceae|g__Alteribacter|s__Alteribacter_lacisalsi	LEfSe	A	0.0643334	0.0345787	no
A - H - I	d__Viruses|p__Uroviricota|c__Caudoviricetes|o__Caudoviricetes_unclassified|f__Caudoviricetes_unclassified|g__Caudoviricetes_unclassified|s__Myoviridae_sp._ctzS633	LEfSe	A	0.0642152	0.0393259	no
A - H - I	d__Bacteria|p__Bacteroidota|c__Cytophagia|o__Cytophagales|f__Hymenobacteraceae|g__Hymenobacter|s__Hymenobacter_rigui	LEfSe	A	0.0641945	0.0190259	no
A - H - I	d__Bacteria|p__Bacteroidota|c__Cytophagia|o__Cytophagales|f__Hymenobacteraceae|g__Hymenobacter|s__Hymenobacter_qilianensis	LEfSe	A	0.0640928	0.0286667	no
A - H - I	d__Bacteria|p__Pseudomonadota|c__Betaproteobacteria|o__Burkholderiales|f__Oxalobacteraceae|g__Actimicrobium	LEfSe	A	0.0640184	0.020564	no
A - H - I	d__Bacteria|p__Pseudomonadota|c__Betaproteobacteria|o__Burkholderiales|f__Oxalobacteraceae|g__Actimicrobium|s__Actimicrobium_sp._CCI2.3	LEfSe	A	0.0640184	0.020564	no
A - H - I	d__Archaea|p__Candidatus_Marsarchaeota	LEfSe	A	0.0639353	0.0203823	no
A - H - I	d__Archaea|p__Candidatus_Marsarchaeota|c__Candidatus_Marsarchaeota_unclassified	LEfSe	A	0.0639353	0.0203823	no
A - H - I	d__Archaea|p__Candidatus_Marsarchaeota|c__Candidatus_Marsarchaeota_unclassified|o__Candidatus_Marsarchaeota_unclassified	LEfSe	A	0.0639353	0.0203823	no
A - H - I	d__Archaea|p__Candidatus_Marsarchaeota|c__Candidatus_Marsarchaeota_unclassified|o__Candidatus_Marsarchaeota_unclassified|f__Candidatus_Marsarchaeota_unclassified	LEfSe	A	0.0639353	0.0203823	no
A - H - I	d__Archaea|p__Candidatus_Marsarchaeota|c__Candidatus_Marsarchaeota_unclassified|o__Candidatus_Marsarchaeota_unclassified|f__Candidatus_Marsarchaeota_unclassified|g__Candidatus_Marsarchaeota_unclassified	LEfSe	A	0.0639353	0.0203823	no
A - H - I	d__Bacteria|p__Bacteroidota|c__Bacteroidia|o__Bacteroidales|f__Bacteroidaceae|g__Bacteroides|s__Bacteroides_sp._BFG-638	LEfSe	I	0.063866	0.0345384	no
A - H - I	d__Bacteria|p__Actinomycetota|c__Coriobacteriia|o__Coriobacteriales|f__Atopobiaceae|g__Olsenella|s__Olsenella_phocaeensis	LEfSe	H	0.0638027	0.0467979	no
A - H - I	d__Bacteria|p__Bacillota|c__Bacilli|o__Bacillales|f__Bacillaceae|g__Halobacillus|s__Halobacillus_hunanensis	LEfSe	H	0.0636668	0.022209	no
A - H - I	d__Bacteria|p__Bacillota|c__Bacilli|o__Bacillales|f__Bacillaceae|g__Bacillus|s__Bacillus_sp._RHFS10	LEfSe	A	0.0636572	0.0166003	no
A - H - I	d__Bacteria|p__Campylobacterota|c__Epsilonproteobacteria|o__Nautiliales|f__Nitratiruptoraceae|g__Nitratiruptor|s__Nitratiruptor_sp._SB155-2	LEfSe	A	0.0635389	0.00419365	no
A - H - I	d__Bacteria|p__Pseudomonadota|c__Gammaproteobacteria|o__Lysobacterales|f__Lysobacteraceae|g__Thermomonas|s__Thermomonas_carbonis	LEfSe	H	0.0634569	0.0086007	no
A - H - I	d__Bacteria|p__Pseudomonadota|c__Alphaproteobacteria|o__Alphaproteobacteria_unclassified|f__Alphaproteobacteria_unclassified|g__Alphaproteobacteria_unclassified|s__Alphaproteobacteria_bacterium_MarineAlpha2_Bin1	LEfSe	A	0.0634428	0.0198447	no
A - H - I	d__Bacteria|p__Bacillota|c__Negativicutes|o__Veillonellales|f__Veillonellaceae|g__Veillonella|s__Veillonella_sp._ICM51a	LEfSe	A	0.0633795	0.0219348	no
A - H - I	d__Eukaryota|p__Ascomycota|c__Taphrinomycetes	LEfSe	A	0.0633001	0.0261603	no
A - H - I	d__Eukaryota|p__Ascomycota|c__Taphrinomycetes|o__Taphrinales	LEfSe	A	0.0633001	0.0261603	no
A - H - I	d__Bacteria|p__Rhodothermota|c__Rhodothermia|o__Rhodothermales|f__Salinibacteraceae|g__Salinibacter|s__Salinibacter_sp.	LEfSe	I	0.0632327	0.0213326	no
A - H - I	d__Bacteria|p__Bacillota|c__Bacilli|o__Bacillales|f__Paenibacillaceae|g__Paenibacillus|s__Paenibacillus_sp._p3-SID1389	LEfSe	A	0.0631993	0.0234494	no
A - H - I	d__Bacteria|p__Pseudomonadota|c__Alphaproteobacteria|o__Rhodospirillales|f__Acetobacteraceae|g__Acidiphilium|s__Acidiphilium_acidophilum	LEfSe	A	0.0631979	0.0491438	no
A - H - I	d__Bacteria|p__Pseudomonadota|c__Alphaproteobacteria|o__Rhodobacterales|f__Paracoccaceae|g__Rubricella	LEfSe	A	0.0631773	0.0317691	no
A - H - I	d__Bacteria|p__Pseudomonadota|c__Alphaproteobacteria|o__Rhodobacterales|f__Paracoccaceae|g__Rubricella|s__Rubricella_aquisinus	LEfSe	A	0.0631773	0.0317691	no
A - H - I	d__Bacteria|p__Chloroflexota|c__Chloroflexota_unclassified|o__Chloroflexota_unclassified|f__Chloroflexota_unclassified|g__Chloroflexota_unclassified|s__Chloroflexi_bacterium_RBG_13_56_8	LEfSe	A	0.0630799	0.0139891	no
A - H - I	d__Bacteria|p__Pseudomonadota|c__Gammaproteobacteria|o__Cellvibrionales|f__Cellvibrionaceae|g__Cellvibrio|s__Cellvibrio_polysaccharolyticus	LEfSe	I	0.0630329	0.00480303	no
A - H - I	d__Bacteria|p__Bacteroidota|c__Cytophagia|o__Cytophagales|f__Hymenobacteraceae|g__Hymenobacter|s__Hymenobacter_negativus	LEfSe	A	0.0629974	0.022209	no
A - H - I	d__Bacteria|p__Bacillota|c__Clostridia|o__Lachnospirales|f__Lachnospiraceae|g__Lachnospiraceae_unclassified|s__Lachnospiraceae_bacterium_AM25-27	LEfSe	I	0.0629163	0.022209	no
A - H - I	d__Bacteria|p__Synergistota|c__Synergistia|o__Synergistales|f__Aminobacteriaceae|g__Aminobacterium|s__Aminobacterium_sp._UBA5514	LEfSe	H	0.0627897	0.0473196	no
A - H - I	d__Bacteria|p__Pseudomonadota|c__Gammaproteobacteria|o__Alteromonadales|f__Alteromonadaceae|g__Bowmanella|s__Bowmanella_denitrificans	LEfSe	H	0.062771	0.0286945	no
A - H - I	d__Bacteria|p__Pseudomonadota|c__Alphaproteobacteria|o__Sphingomonadales|f__Sphingomonadaceae|g__Novosphingobium|s__Novosphingobium_sp._SCN_66-18	LEfSe	H	0.0625839	0.00936507	no
A - H - I	d__Bacteria|p__Pseudomonadota|c__Alphaproteobacteria|o__Sphingomonadales|f__Erythrobacteraceae|g__Erythrobacter|s__Erythrobacter_sp.	LEfSe	A	0.062512	0.0252769	no
A - H - I	d__Bacteria|p__Pseudomonadota|c__Betaproteobacteria|o__Burkholderiales|f__Comamonadaceae|g__Lampropedia	LEfSe	H	0.0625086	0.0345384	no
A - H - I	d__Bacteria|p__Cyanobacteriota|c__Cyanophyceae|o__Pseudanabaenales|f__Pseudanabaenaceae|g__Pseudanabaena|s__Pseudanabaena_sp._ABRG5-3	LEfSe	I	0.0623579	0.0150171	no
A - H - I	d__Bacteria|p__Mycoplasmatota|c__Mollicutes|o__Mycoplasmatales|f__Mycoplasmataceae|g__Mycoplasma|s__Mycoplasma_sp._(ex_Biomphalaria_glabrata)	LEfSe	A	0.0623171	0.00724028	no
A - H - I	d__Bacteria|p__Bacillota|c__Bacilli|o__Lactobacillales|f__Lactobacillaceae|g__Lacticaseibacillus|s__Lacticaseibacillus_yichunensis	LEfSe	A	0.0623047	0.0190259	no
A - H - I	d__Bacteria|p__Pseudomonadota|c__Alphaproteobacteria|o__Hyphomicrobiales|f__Aurantimonadaceae|g__Aureimonas|s__Aureimonas_endophytica	LEfSe	A	0.0622849	0.00546371	no
A - H - I	d__Bacteria|p__Actinomycetota|c__Coriobacteriia|o__Coriobacteriales|f__Coriobacteriaceae|g__Collinsella|s__Collinsella_sp._AM34-10	LEfSe	A	0.0622713	0.0391373	no
A - H - I	d__Bacteria|p__Pseudomonadota|c__Gammaproteobacteria|o__Thiotrichales|f__Francisellaceae|g__Francisella|s__Francisella_sp._XLW-1	LEfSe	A	0.0621244	0.0276575	no
A - H - I	d__Bacteria|p__Pseudomonadota|c__Betaproteobacteria|o__Burkholderiales|f__Oxalobacteraceae|g__Herbaspirillum|s__Herbaspirillum_camelliae	LEfSe	A	0.0620185	0.0193794	no
A - H - I	d__Bacteria|p__Pseudomonadota|c__Alphaproteobacteria|o__Sphingomonadales|f__Erythrobacteraceae|g__Alteriqipengyuania|s__Alteriqipengyuania_abyssalis	LEfSe	I	0.0615842	0.0489217	no
A - H - I	d__Bacteria|p__Bacteroidota|c__Flavobacteriia|o__Flavobacteriales|f__Flavobacteriaceae|g__Allomuricauda|s__Muricauda_sp._MAR_2010_75	LEfSe	H	0.0615451	0.0189739	no
A - H - I	d__Bacteria|p__Bacteroidota|c__Flavobacteriia|o__Flavobacteriales|f__Flavobacteriaceae|g__Aquimarina|s__Aquimarina_sp._I32.4	LEfSe	I	0.0615168	0.010115	no
A - H - I	d__Bacteria|p__Pseudomonadota|c__Gammaproteobacteria|o__Alteromonadales|f__Pseudoalteromonadaceae|g__Pseudoalteromonas|s__Pseudoalteromonas_piscicida	LEfSe	A	0.0614333	0.0396555	no
A - H - I	d__Bacteria|p__Bacteroidota|c__Flavobacteriia|o__Flavobacteriales|f__Flavobacteriaceae|g__Paenimyroides|s__Paenimyroides_tangerinum	LEfSe	H	0.0614187	0.00372978	no
A - H - I	d__Bacteria|p__Bacillota|c__Bacilli|o__Bacillales|f__Bacillaceae|g__Neobacillus|s__Neobacillus_sp._PS3-34	LEfSe	I	0.0613982	0.0109882	no
A - H - I	d__Bacteria|p__Bacteroidota|c__Flavobacteriia|o__Flavobacteriales|f__Flavobacteriaceae|g__Flavobacterium|s__Flavobacterium_restrictum	LEfSe	H	0.0613176	0.00966729	no
A - H - I	d__Bacteria|p__Pseudomonadota|c__Betaproteobacteria|o__Burkholderiales|f__Oxalobacteraceae|g__Sapientia	LEfSe	H	0.0613163	0.0335412	no
A - H - I	d__Bacteria|p__Pseudomonadota|c__Betaproteobacteria|o__Burkholderiales|f__Oxalobacteraceae|g__Sapientia|s__Sapientia_aquatica	LEfSe	H	0.0613163	0.0335412	no
A - H - I	d__Bacteria|p__Bacillota|c__Clostridia|o__Eubacteriales|f__Desulfitobacteriaceae|g__Dehalobacter|s__Dehalobacter_sp._CF	LEfSe	A	0.0612657	0.0417098	no
A - H - I	d__Bacteria|p__Pseudomonadota|c__Gammaproteobacteria|o__Oceanospirillales|f__Oceanospirillaceae|g__Marinomonas|s__Marinomonas_fungiae	LEfSe	A	0.0612598	0.0358359	no
A - H - I	d__Bacteria|p__Pseudomonadota|c__Alphaproteobacteria|o__Maricaulales|f__Maricaulaceae|g__Oceanicaulis|s__Oceanicaulis_unclassified	LEfSe	H	0.0611766	0.047567	no
A - H - I	d__Bacteria|p__Pseudomonadota|c__Alphaproteobacteria|o__Rhodobacterales|f__Roseobacteraceae|g__Oceanicola	LEfSe	A	0.0611332	0.0313014	no
A - H - I	d__Bacteria|p__Candidatus_Falkowbacteria|c__Candidatus_Falkowbacteria_unclassified|o__Candidatus_Falkowbacteria_unclassified|f__Candidatus_Falkowbacteria_unclassified|g__Candidatus_Falkowbacteria_unclassified|s__Candidatus_Falkowbacteria_bacterium_GW2011_GWD2_38_42	LEfSe	A	0.0611015	0.0308161	no
A - H - I	d__Bacteria|p__Pseudomonadota|c__Gammaproteobacteria|o__Vibrionales|f__Vibrionaceae|g__Vibrio|s__Vibrio_sp._JPW-9-11-11	LEfSe	H	0.0609511	0.0398516	no
A - H - I	d__Bacteria|p__Pseudomonadota|c__Alphaproteobacteria|o__Rhodobacterales|f__Roseobacteraceae|g__Roseovarius|s__Roseovarius_litoreus	LEfSe	I	0.0609492	0.0116252	no
A - H - I	d__Bacteria|p__Pseudomonadota|c__Betaproteobacteria|o__Burkholderiales|f__Alcaligenaceae|g__Eoetvoesiella	LEfSe	I	0.0609412	0.0403622	no
A - H - I	d__Bacteria|p__Pseudomonadota|c__Betaproteobacteria|o__Burkholderiales|f__Alcaligenaceae|g__Eoetvoesiella|s__Eoetvoesiella_caeni	LEfSe	I	0.0609412	0.0403622	no
A - H - I	d__Bacteria|p__Bacillota|c__Bacilli|o__Bacillales|f__Bacillaceae|g__Paraliobacillus|s__Paraliobacillus_sp._X-1268	LEfSe	H	0.0608011	0.014965	no
A - H - I	d__Bacteria|p__Pseudomonadota|c__Gammaproteobacteria|o__Oceanospirillales|f__Oceanospirillaceae|g__Marinomonas|s__Marinomonas_balearica	LEfSe	A	0.0607758	0.00352806	no
A - H - I	d__Bacteria|p__Bacteroidota|c__Flavobacteriia|o__Flavobacteriales|f__Flavobacteriaceae|g__Flavobacterium|s__Flavobacterium_sp._KACC_22763	LEfSe	I	0.0607414	0.0420736	no
A - H - I	d__Archaea|p__Euryarchaeota|c__Methanomicrobia|o__Methanomicrobiales|f__Methanomicrobiaceae|g__Methanoculleus|s__Methanoculleus_sp._UBA303	LEfSe	A	0.0606814	0.0435718	no
A - H - I	d__Bacteria|p__Cyanobacteriota|c__Cyanophyceae|o__Nodosilineales|f__Nodosilineaceae|g__Nodosilinea|s__Nodosilinea_sp._LEGE_07298	LEfSe	A	0.0606031	0.0177676	no
A - H - I	d__Bacteria|p__Campylobacterota|c__Epsilonproteobacteria|o__Campylobacterales|f__Arcobacteraceae|g__Halarcobacter|s__Halarcobacter_ebronensis	LEfSe	H	0.0605981	0.0185263	no
A - H - I	d__Bacteria|p__Pseudomonadota|c__Gammaproteobacteria|o__Cellvibrionales|f__Cellvibrionaceae|g__Cellvibrio|s__Cellvibrio_mixtus	LEfSe	A	0.0605882	0.019465	no
A - H - I	d__Bacteria|p__Pseudomonadota|c__Betaproteobacteria|o__Betaproteobacteria_unclassified|f__Betaproteobacteria_unclassified|g__Betaproteobacteria_unclassified|s__Betaproteobacteria_bacterium_RIFCSPLOWO2_02_FULL_63_19	LEfSe	A	0.0604592	0.037472	no
A - H - I	d__Viruses|p__Uroviricota|c__Caudoviricetes|o__Caudoviricetes_unclassified|f__Caudoviricetes_unclassified|g__Caudoviricetes_unclassified|s__Siphoviridae_sp._ctJbC4	LEfSe	H	0.0604307	0.0380363	no
A - H - I	d__Eukaryota|p__Basidiomycota|c__Tremellomycetes	LEfSe	A	0.0603602	0.0486341	no
A - H - I	d__Bacteria|p__Pseudomonadota|c__Betaproteobacteria|o__Nitrosomonadales|f__Thiobacillaceae|g__Thiobacillus|s__Thiobacillus_sp._SCUT-2	LEfSe	A	0.0601185	0.0417882	no
A - H - I	d__Bacteria|p__Pseudomonadota|c__Alphaproteobacteria|o__Rhodobacterales|f__Paracoccaceae|g__Pararhodobacter|s__Pararhodobacter_zhoushanensis	LEfSe	A	0.0601	0.0174583	no
A - H - I	d__Bacteria|p__Pseudomonadota|c__Alphaproteobacteria|o__Caulobacterales|f__Caulobacteraceae|g__Brevundimonas|s__Brevundimonas_subvibrioides	LEfSe	A	0.0600712	0.0423379	no
A - H - I	d__Bacteria|p__Bacteroidota|c__Bacteroidia|o__Marinilabiliales|f__Marinifilaceae|g__Marinifilum|s__Marinifilum_unclassified	LEfSe	A	0.060063	0.0119524	no
A - H - I	d__Bacteria|p__Bacteroidota|c__Cytophagia|o__Cytophagales|f__Hymenobacteraceae|g__Adhaeribacter|s__uncultured_Adhaeribacter_sp.	LEfSe	A	0.0600621	0.001396	no
A - H - I	d__Bacteria|p__Bacillota|c__Bacilli|o__Lactobacillales|f__Carnobacteriaceae|g__Carnobacterium|s__Carnobacterium_sp._CP1	LEfSe	A	0.0600528	0.0161165	no
A - H - I	d__Bacteria|p__Actinomycetota|c__Actinomycetes|o__Kineosporiales|f__Kineosporiaceae|g__Kineococcus|s__Kineococcus_radiotolerans	LEfSe	I	0.0599176	0.0140336	no
A - H - I	d__Bacteria|p__Pseudomonadota|c__Alphaproteobacteria|o__Rhodobacterales|f__Roseobacteraceae|g__Tateyamaria|s__Tateyamaria_sp._Alg231-49	LEfSe	A	0.059838	0.0176315	no
A - H - I	d__Bacteria|p__Bacteroidota|c__Flavobacteriia|o__Flavobacteriales|f__Flavobacteriaceae|g__Capnocytophaga|s__Capnocytophaga_sp._oral_taxon_335	LEfSe	H	0.0597254	0.0150288	no
A - H - I	d__Bacteria|p__Bacteroidota|c__Flavobacteriia|o__Flavobacteriales|f__Flavobacteriaceae|g__Flavobacterium|s__Flavobacterium_endophyticum	LEfSe	I	0.0596366	0.0399531	no
A - H - I	d__Bacteria|p__Bacillota|c__Bacilli|o__Bacillales|f__Staphylococcaceae|g__Salinicoccus|s__Salinicoccus_kekensis	LEfSe	I	0.0596085	0.0407023	no
A - H - I	d__Bacteria|p__Pseudomonadota|c__Gammaproteobacteria|o__Vibrionales|f__Vibrionaceae|g__Photobacterium|s__Photobacterium_frigidiphilum	LEfSe	I	0.0595217	0.0471647	no
A - H - I	d__Bacteria|p__Thermodesulfobacteriota|c__Desulfuromonadia|o__Geobacterales|f__Geobacteraceae|g__Geomonas|s__Geomonas_sp._Red32	LEfSe	A	0.0593918	0.0109655	no
A - H - I	d__Bacteria|p__Bacteroidota|c__Flavobacteriia|o__Flavobacteriales|f__Flavobacteriaceae|g__Ulvibacter|s__Ulvibacter_sp._MAR_2010_11	LEfSe	A	0.0593383	0.0177005	no
A - H - I	d__Bacteria|p__Bacillota|c__Clostridia|o__Eubacteriales|f__Acutalibacteraceae|g__Caproicibacter|s__Caproicibacter_unclassified	LEfSe	H	0.059233	0.0214459	no
A - H - I	d__Bacteria|p__Pseudomonadota|c__Gammaproteobacteria|o__Enterobacterales|f__Erwiniaceae|g__Pantoea|s__Pantoea_stewartii	LEfSe	A	0.0591787	0.0243706	no
A - H - I	d__Bacteria|p__Pseudomonadota|c__Gammaproteobacteria|o__Alteromonadales|f__Pseudoalteromonadaceae|g__Psychrosphaera|s__Psychrosphaera_saromensis	LEfSe	A	0.0590967	0.0395418	no
A - H - I	d__Bacteria|p__Pseudomonadota|c__Alphaproteobacteria|o__Rhodobacterales|f__Paracoccaceae|g__Pseudogemmobacter	LEfSe	A	0.0590513	0.0115231	no
A - H - I	d__Bacteria|p__Pseudomonadota|c__Alphaproteobacteria|o__Rhodobacterales|f__Paracoccaceae|g__Frigidibacter|s__Frigidibacter_sp._SD6-1	LEfSe	A	0.0590218	0.0130134	no
A - H - I	d__Bacteria|p__Bacteroidota|c__Flavobacteriia|o__Flavobacteriales|f__Flavobacteriaceae|g__Flagellimonas|s__Flagellimonas_flava	LEfSe	H	0.0590168	0.0155994	no
A - H - I	d__Bacteria|p__Pseudomonadota|c__Betaproteobacteria|o__Burkholderiales|f__Burkholderiaceae|g__Burkholderia|s__Burkholderia_mayonis	LEfSe	A	0.0589901	0.00168684	no
A - H - I	d__Bacteria|p__Chloroflexota|c__Chloroflexota_unclassified|o__Chloroflexota_unclassified|f__Chloroflexota_unclassified|g__Chloroflexota_unclassified|s__uncultured_Chloroflexota_bacterium	LEfSe	H	0.0589196	0.030891	no
A - H - I	d__Bacteria|p__Pseudomonadota|c__Alphaproteobacteria|o__Rhodospirillales|f__Rhodospirillaceae|g__Rhodospirillaceae_unclassified|s__Rhodospirillaceae_bacterium_TMED167	LEfSe	A	0.0587874	0.00639317	no
A - H - I	d__Archaea|p__Euryarchaeota|c__Methanobacteria|o__Methanobacteriales|f__Methanobacteriaceae|g__Methanobacterium|s__Methanobacterium_sp._PtaU1.Bin242	LEfSe	H	0.0587237	0.0378922	no
A - H - I	d__Bacteria|p__Pseudomonadota|c__Alphaproteobacteria|o__Hyphomicrobiales|f__Hyphomicrobiaceae|g__Filomicrobium|s__Candidatus_Filomicrobium_marinum	LEfSe	A	0.0586815	0.0440394	no
A - H - I	d__Bacteria|p__Bacillota|c__Clostridia|o__Eubacteriales|f__Clostridiaceae|g__Clostridium|s__Clostridium_sp._LS	LEfSe	I	0.0586516	0.0316425	no
A - H - I	d__Bacteria|p__Actinomycetota|c__Thermoleophilia|o__Solirubrobacterales|f__Patulibacteraceae	LEfSe	A	0.0586333	0.0497991	no
A - H - I	d__Bacteria|p__Actinomycetota|c__Thermoleophilia|o__Solirubrobacterales|f__Patulibacteraceae|g__Patulibacter	LEfSe	A	0.0586333	0.0497991	no
A - H - I	d__Bacteria|p__Actinomycetota|c__Thermoleophilia|o__Solirubrobacterales|f__Patulibacteraceae|g__Patulibacter|s__Patulibacter_sp._DM4	LEfSe	A	0.0586333	0.0497991	no
A - H - I	d__Bacteria|p__Pseudomonadota|c__Alphaproteobacteria|o__Hyphomicrobiales|f__Phyllobacteriaceae|g__Aminobacter|s__Aminobacter_sp._MDW-2	LEfSe	A	0.058527	0.00713274	no
A - H - I	d__Bacteria|p__Bacillota|c__Bacilli|o__Bacillales|f__Planococcaceae|g__Jeotgalibacillus|s__Jeotgalibacillus_sp._R-1-5s-1	LEfSe	A	0.058368	0.0293246	no
A - H - I	d__Bacteria|p__Actinomycetota|c__Actinomycetes|o__Micrococcales|f__Microbacteriaceae|g__Microbacterium|s__Microbacterium_terrae	LEfSe	I	0.0583616	0.0230272	no
A - H - I	d__Bacteria|p__Bacillota|c__Bacilli|o__Bacillales|f__Bacillaceae|g__Anoxybacillus|s__Anoxybacillus_rupiensis	LEfSe	A	0.0583012	0.00412269	no
A - H - I	d__Bacteria|p__Pseudomonadota|c__Alphaproteobacteria|o__Sphingomonadales|f__Sphingomonadaceae|g__Sphingomonas|s__Sphingomonas_crocodyli	LEfSe	A	0.0582823	0.0190776	no
A - H - I	d__Bacteria|p__Actinomycetota|c__Actinomycetes|o__Bifidobacteriales|f__Bifidobacteriaceae|g__Bifidobacterium|s__Bifidobacterium_simiiventris	LEfSe	I	0.0581149	0.0332902	no
A - H - I	d__Bacteria|p__Pseudomonadota|c__Alphaproteobacteria|o__Hyphomicrobiales|f__Methylobacteriaceae|g__Methylobacterium|s__Methylobacterium_sp._J-088	LEfSe	A	0.0580069	0.0398807	no
A - H - I	d__Bacteria|p__Bacteroidota|c__Flavobacteriia|o__Flavobacteriales|f__Flavobacteriaceae|g__Hyunsoonleella|s__Hyunsoonleella_aquatilis	LEfSe	H	0.0579911	0.0338343	no
A - H - I	d__Bacteria|p__Pseudomonadota|c__Alphaproteobacteria|o__Rhodobacterales|f__Roseobacteraceae|g__Oceanicola|s__Oceanicola_sp._22II-s10i	LEfSe	A	0.0578492	0.0136467	no
A - H - I	d__Bacteria|p__Bacillota|c__Bacilli|o__Lactobacillales|f__Lactobacillaceae|g__Loigolactobacillus|s__Loigolactobacillus_bifermentans	LEfSe	I	0.0578371	0.0484994	no
A - H - I	d__Viruses|p__Uroviricota|c__Caudoviricetes|o__Caudoviricetes_unclassified|f__Caudoviricetes_unclassified|g__Caudoviricetes_unclassified|s__Myoviridae_sp._ctGgs6	LEfSe	H	0.0577996	0.00191574	no
A - H - I	d__Bacteria|p__Pseudomonadota|c__Gammaproteobacteria|o__Thiohalomonadales|f__Thiohalophilaceae	LEfSe	A	0.0577242	0.0404109	no
A - H - I	d__Bacteria|p__Pseudomonadota|c__Gammaproteobacteria|o__Thiohalomonadales|f__Thiohalophilaceae|g__Thiohalophilus	LEfSe	A	0.0577242	0.0404109	no
A - H - I	d__Bacteria|p__Pseudomonadota|c__Gammaproteobacteria|o__Thiohalomonadales|f__Thiohalophilaceae|g__Thiohalophilus|s__Thiohalophilus_sp.	LEfSe	A	0.0577242	0.0404109	no
A - H - I	d__Bacteria|p__Pseudomonadota|c__Alphaproteobacteria|o__Hyphomicrobiales|f__Devosiaceae|g__Paradevosia	LEfSe	A	0.0577168	0.0431446	no
A - H - I	d__Bacteria|p__Pseudomonadota|c__Alphaproteobacteria|o__Hyphomicrobiales|f__Devosiaceae|g__Paradevosia|s__Paradevosia_shaoguanensis	LEfSe	A	0.0577168	0.0431446	no
A - H - I	d__Bacteria|p__Pseudomonadota|c__Alphaproteobacteria|o__Hyphomicrobiales|f__Brucellaceae|g__Brucella|s__Brucella_endophytica	LEfSe	A	0.0576471	0.0251392	no
A - H - I	d__Bacteria|p__Actinomycetota|c__Actinomycetes|o__Micrococcales|f__Microbacteriaceae|g__Agromyces|s__Agromyces_humatus	LEfSe	I	0.0576315	0.0307746	no
A - H - I	d__Bacteria|p__Actinomycetota|c__Actinomycetes|o__Micrococcales|f__Microbacteriaceae|g__Microbacteriaceae_unclassified|s__Microbacteriaceae_bacterium_MWH-Ta3	LEfSe	H	0.0575196	0.0482351	no
A - H - I	d__Bacteria|p__Bacillota|c__Bacilli|o__Bacillales|f__Bacillaceae|g__Virgibacillus|s__Virgibacillus_alimentarius	LEfSe	H	0.0574138	0.0313875	no
A - H - I	d__Bacteria|p__Pseudomonadota|c__Alphaproteobacteria|o__Rhodospirillales|f__Azospirillaceae|g__Niveispirillum|s__Niveispirillum_sp._SYP-B3756	LEfSe	A	0.0573789	0.0291889	no
A - H - I	d__Bacteria|p__Bacteroidota|c__Chitinophagia|o__Chitinophagales|f__Chitinophagaceae|g__Flaviaesturariibacter	LEfSe	A	0.0573503	0.046256	no
A - H - I	d__Bacteria|p__Pseudomonadota|c__Alphaproteobacteria|o__Hyphomicrobiales|f__Methylobacteriaceae|g__Methylobacterium|s__Methylobacterium_sp._Leaf87	LEfSe	A	0.0572814	0.0302373	no
A - H - I	d__Bacteria|p__Bacillota|c__Erysipelotrichia|o__Erysipelotrichales|f__Erysipelotrichaceae|g__Erysipelothrix|s__Erysipelothrix_enhydrae	LEfSe	A	0.0571782	0.00818292	no
A - H - I	d__Bacteria|p__Pseudomonadota|c__Alphaproteobacteria|o__Alphaproteobacteria_unclassified|f__Alphaproteobacteria_unclassified|g__Alphaproteobacteria_unclassified|s__Alphaproteobacteria_bacterium_40-19	LEfSe	A	0.0570779	0.0157321	no
A - H - I	d__Bacteria|p__Pseudomonadota|c__Gammaproteobacteria|o__Pasteurellales|f__Pasteurellaceae|g__Ursidibacter|s__Ursidibacter_maritimus	LEfSe	H	0.0567565	0.00352524	no
A - H - I	d__Bacteria|p__Pseudomonadota|c__Betaproteobacteria|o__Burkholderiales|f__Sphaerotilaceae|g__Sphaerotilus|s__Sphaerotilus_microaerophilus	LEfSe	A	0.0566719	0.0441291	no
A - H - I	d__Archaea|p__Euryarchaeota|c__Methanomicrobia|o__Methanosarcinales|f__Methanosarcinaceae|g__Methanosarcina|s__Methanosarcina_sp._2.H.A.1B.4	LEfSe	A	0.0566446	0.0304765	no
A - H - I	d__Bacteria|p__Bacteroidota|c__Flavobacteriia|o__Flavobacteriales|f__Flavobacteriaceae|g__Leeuwenhoekiella|s__Leeuwenhoekiella_parthenopeia	LEfSe	H	0.0565387	0.019444	no
A - H - I	d__Bacteria|p__Bacteroidota|c__Bacteroidota_unclassified|o__Bacteroidota_unclassified|f__Bacteroidota_unclassified|g__Bacteroidota_unclassified|s__Bacteroidetes_bacterium_RBG_13_44_24	LEfSe	A	0.0565164	0.0465713	no
A - H - I	d__Bacteria|p__Actinomycetota|c__Actinomycetes|o__Micrococcales|f__Microbacteriaceae|g__Homoserinibacter|s__Homoserinibacter_gongjuensis	LEfSe	A	0.0564711	0.036994	no
A - H - I	d__Bacteria|p__Bacillota|c__Bacilli|o__Bacillales|f__Bacillaceae|g__Peribacillus|s__Peribacillus_tepidiphilus	LEfSe	A	0.0564704	0.0162043	no
A - H - I	d__Bacteria|p__Bacteroidota|c__Flavobacteriia|o__Flavobacteriales|f__Flavobacteriaceae|g__Flavobacterium|s__Flavobacterium_dauae	LEfSe	H	0.0563574	0.0209202	no
A - H - I	d__Bacteria|p__Pseudomonadota|c__Alphaproteobacteria|o__Caulobacterales|f__Caulobacteraceae|g__Asticcacaulis|s__Asticcacaulis_machinosus	LEfSe	A	0.0563519	0.0392883	no
A - H - I	d__Bacteria|p__Bacillota|c__Bacilli|o__Lactobacillales|f__Lactobacillaceae|g__Companilactobacillus|s__Companilactobacillus_kimchiensis	LEfSe	A	0.0563431	0.0362637	no
A - H - I	d__Bacteria|p__Actinomycetota|c__Actinomycetes|o__Micrococcales|f__Microbacteriaceae|g__Planctomonas	LEfSe	H	0.0559876	0.0443585	no
A - H - I	d__Bacteria|p__Actinomycetota|c__Actinomycetes|o__Micrococcales|f__Microbacteriaceae|g__Planctomonas|s__Planctomonas_deserti	LEfSe	H	0.0559876	0.0443585	no
A - H - I	d__Viruses|p__Uroviricota|c__Caudoviricetes|o__Caudoviricetes_unclassified|f__Caudoviricetes_unclassified|g__Caudoviricetes_unclassified|s__Arthrobacter_phage_Stayer	LEfSe	A	0.0559379	0.0372428	no
A - H - I	d__Bacteria|p__Pseudomonadota|c__Alphaproteobacteria|o__Hyphomicrobiales|f__Aurantimonadaceae|g__Jiella|s__Jiella_pelagia	LEfSe	A	0.0558942	0.0328705	no
A - H - I	d__Bacteria|p__Pseudomonadota|c__Alphaproteobacteria|o__Hyphomicrobiales|f__Chelatococcaceae|g__Chelatococcus|s__Chelatococcus_unclassified	LEfSe	A	0.0557577	0.00958852	no
A - H - I	d__Bacteria|p__Pseudomonadota|c__Betaproteobacteria|o__Burkholderiales|f__Oxalobacteraceae|g__Noviherbaspirillum|s__Noviherbaspirillum_autotrophicum	LEfSe	A	0.0557554	0.00885042	no
A - H - I	d__Bacteria|p__Bacillota|c__Bacilli|o__Bacillales|f__Paenibacillaceae|g__Paenibacillus|s__Paenibacillus_sp._VTT_E-133280	LEfSe	I	0.0555706	0.00668194	no
A - H - I	d__Bacteria|p__Pseudomonadota|c__Betaproteobacteria|o__Betaproteobacteria_unclassified|f__Casimicrobiaceae	LEfSe	A	0.0555527	0.044886	no
A - H - I	d__Bacteria|p__Pseudomonadota|c__Betaproteobacteria|o__Betaproteobacteria_unclassified|f__Casimicrobiaceae|g__Casimicrobium	LEfSe	A	0.0555527	0.044886	no
A - H - I	d__Bacteria|p__Pseudomonadota|c__Betaproteobacteria|o__Betaproteobacteria_unclassified|f__Casimicrobiaceae|g__Casimicrobium|s__Casimicrobium_huifangae	LEfSe	A	0.0555527	0.044886	no
A - H - I	d__Bacteria|p__Pseudomonadota|c__Alphaproteobacteria|o__Hyphomicrobiales|f__Xanthobacteraceae|g__Aquabacter|s__Aquabacter_sp._L1I39	LEfSe	A	0.0553911	0.0353621	no
A - H - I	d__Bacteria|p__Pseudomonadota|c__Betaproteobacteria|o__Burkholderiales|f__Burkholderiaceae|g__Trinickia|s__Trinickia_diaoshuihuensis	LEfSe	A	0.0553744	0.00498636	no
A - H - I	d__Bacteria|p__Actinomycetota|c__Actinomycetes|o__Propionibacteriales|f__Propionibacteriaceae|g__Propioniciclava|s__Propioniciclava_coleopterorum	LEfSe	H	0.0551112	0.00214253	no
A - H - I	d__Bacteria|p__Pseudomonadota|c__Gammaproteobacteria|o__Oceanospirillales|f__Zooshikellaceae|g__Spartinivicinus|s__Spartinivicinus_ruber	LEfSe	A	0.0551009	0.0142534	no
A - H - I	d__Bacteria|p__Pseudomonadota|c__Alphaproteobacteria|o__Hyphomicrobiales|f__Beijerinckiaceae|g__Beijerinckia|s__Beijerinckia_unclassified	LEfSe	A	0.0549873	0.049498	no
A - H - I	d__Bacteria|p__Pseudomonadota|c__Alphaproteobacteria|o__Hyphomicrobiales|f__Methylobacteriaceae|g__Methylobacterium|s__Methylobacterium_symbioticum	LEfSe	A	0.0549522	0.0412231	no
A - H - I	d__Bacteria|p__Pseudomonadota|c__Alphaproteobacteria|o__Rhodothalassiales|f__Rhodothalassiaceae|g__Rhodothalassium	LEfSe	A	0.0549394	0.0310654	no
A - H - I	d__Bacteria|p__Pseudomonadota|c__Alphaproteobacteria|o__Rhodothalassiales|f__Rhodothalassiaceae|g__Rhodothalassium|s__Rhodothalassium_salexigens	LEfSe	A	0.0549394	0.0310654	no
A - H - I	d__Archaea|p__Euryarchaeota|c__Halobacteria|o__Halobacteriales|f__Haloferacaceae|g__Haloferax	LEfSe	A	0.0549158	0.00923667	no
A - H - I	d__Archaea|p__Euryarchaeota|c__Halobacteria|o__Halobacteriales|f__Haloferacaceae|g__Haloferax|s__Haloferax_unclassified	LEfSe	A	0.0549158	0.00923667	no
A - H - I	d__Bacteria|p__Bacteroidota|c__Flavobacteriia|o__Flavobacteriales|f__Flavobacteriaceae|g__Mesonia|s__Mesonia_aquimarina	LEfSe	A	0.0547943	0.0173469	no
A - H - I	d__Bacteria|p__Pseudomonadota|c__Alphaproteobacteria|o__Caulobacterales|f__Caulobacteraceae|g__Asticcacaulis|s__Asticcacaulis_unclassified	LEfSe	A	0.0547911	0.0150171	no
A - H - I	d__Bacteria|p__Bacillota|c__Bacilli|o__Lactobacillales|f__Streptococcaceae|g__Lactococcus|s__Lactococcus_reticulitermitis	LEfSe	A	0.0546927	0.0160837	no
A - H - I	d__Bacteria|p__Actinomycetota|c__Actinomycetes|o__Micrococcales|f__Microbacteriaceae|g__Microbacterium|s__Microbacterium_halophytorum	LEfSe	A	0.054601	0.0354465	no
A - H - I	d__Bacteria|p__Pseudomonadota|c__Gammaproteobacteria|o__Alteromonadales|f__Colwelliaceae|g__Thalassotalea|s__Thalassotalea_psychrophila	LEfSe	A	0.0545048	0.0389544	no
A - H - I	d__Bacteria|p__Pseudomonadota|c__Alphaproteobacteria|o__Maricaulales|f__Maricaulaceae|g__Oceanicaulis|s__Oceanicaulis_sp._HTCC2633	LEfSe	A	0.0544212	0.0404658	no
A - H - I	d__Bacteria|p__Rhodothermota|c__Rhodothermia|o__Rhodothermales|f__Rubricoccaceae|g__Rubricoccus	LEfSe	H	0.054392	0.00662384	no
A - H - I	d__Bacteria|p__Rhodothermota|c__Rhodothermia|o__Rhodothermales|f__Rubricoccaceae|g__Rubricoccus|s__Rubricoccus_marinus	LEfSe	H	0.054392	0.00662384	no
A - H - I	d__Bacteria|p__Bacteroidota|c__Flavobacteriia|o__Flavobacteriales|f__Flavobacteriaceae|g__Aquimarina|s__Aquimarina_brevivitae	LEfSe	A	0.0543409	0.0193837	no
A - H - I	d__Bacteria|p__Pseudomonadota|c__Alphaproteobacteria|o__Rhodobacterales|f__Roseobacteraceae|g__Ruegeria|s__Ruegeria_sp._HKCCD8929	LEfSe	A	0.0542108	0.015593	no
A - H - I	d__Bacteria|p__Pseudomonadota|c__Alphaproteobacteria|o__Alphaproteobacteria_unclassified|f__Alphaproteobacteria_unclassified|g__Alphaproteobacteria_unclassified|s__Alphaproteobacteria_bacterium_TMED93	LEfSe	A	0.0542067	0.0396365	no
A - H - I	d__Bacteria|p__Mycoplasmatota|c__Mycoplasmatota_unclassified|o__Mycoplasmoidales|f__Metamycoplasmataceae|g__Mycoplasmopsis|s__Mycoplasmopsis_sturni	LEfSe	A	0.0541339	0.0304659	no
A - H - I	d__Bacteria|p__Bacteroidota|c__Cytophagia|o__Cytophagales|f__Hymenobacteraceae|g__Hymenobacter|s__Hymenobacter_aerilatus	LEfSe	I	0.0540383	0.0248554	no
A - H - I	d__Bacteria|p__Pseudomonadota|c__Gammaproteobacteria|o__Enterobacterales|f__Pectobacteriaceae|g__Pectobacterium|s__Pectobacterium_betavasculorum	LEfSe	A	0.0537504	0.0254293	no
A - H - I	d__Bacteria|p__Pseudomonadota|c__Betaproteobacteria|o__Burkholderiales|f__Burkholderiaceae|g__Cupriavidus|s__Cupriavidus_sp._WKF15	LEfSe	A	0.0535053	0.0232396	no
A - H - I	d__Bacteria|p__Pseudomonadota|c__Betaproteobacteria|o__Burkholderiales|f__Burkholderiaceae|g__Polynucleobacter|s__Polynucleobacter_sp._86C-FISCH	LEfSe	A	0.0532451	0.0111243	no
A - H - I	d__Eukaryota|p__Ascomycota|c__Sordariomycetes|o__Xylariales|f__Xylariaceae|g__Xylariaceae_unclassified	LEfSe	A	0.0531378	0.0334693	no
A - H - I	d__Bacteria|p__Bacteroidota|c__Flavobacteriia|o__Flavobacteriales|f__Flavobacteriaceae|g__Gillisia|s__Gillisia_sp._CAL575	LEfSe	A	0.0529223	0.0239556	no
A - H - I	d__Bacteria|p__Actinomycetota|c__Actinomycetes|o__Mycobacteriales|f__Nocardiaceae|g__Rhodococcus|s__Rhodococcus_pyridinivorans	LEfSe	A	0.0528946	0.0237543	no
A - H - I	d__Bacteria|p__Pseudomonadota|c__Alphaproteobacteria|o__Hyphomicrobiales|f__Rhizobiaceae|g__Mycoplana	LEfSe	A	0.0527434	0.0417841	no
A - H - I	d__Bacteria|p__Bacillota|c__Bacilli|o__Bacillales|f__Planococcaceae|g__Sporosarcina|s__Sporosarcina_sp._Marseille-Q4943	LEfSe	H	0.0526491	0.0242881	no
A - H - I	d__Bacteria|p__Actinomycetota|c__Actinomycetes|o__Mycobacteriales|f__Nocardiaceae|g__Rhodococcus|s__Rhodococcus_erythropolis	LEfSe	I	0.0524633	0.0170054	no
A - H - I	d__Bacteria|p__Pseudomonadota|c__Alphaproteobacteria|o__Hyphomicrobiales|f__Rhodoblastaceae|g__Rhodoblastus|s__Rhodoblastus_sp._17X3	LEfSe	A	0.0524487	0.00923927	no
A - H - I	d__Bacteria|p__Planctomycetota|c__Planctomycetota_unclassified|o__Planctomycetota_unclassified|f__Planctomycetota_unclassified|g__Planctomycetota_unclassified|s__Planctomycetes_bacterium_DG_20	LEfSe	H	0.0524222	0.02233	no
A - H - I	d__Bacteria|p__Actinomycetota|c__Actinomycetes|o__Mycobacteriales|f__Dietziaceae|g__Dietzia|s__Dietzia_aerolata	LEfSe	I	0.052325	0.00854701	no
A - H - I	d__Viruses|p__Uroviricota|c__Caudoviricetes|o__Caudoviricetes_unclassified|f__Herelleviridae|g__Twortvirus	LEfSe	A	0.0521483	0.0303959	no
A - H - I	d__Viruses|p__Uroviricota|c__Caudoviricetes|o__Caudoviricetes_unclassified|f__Herelleviridae|g__Twortvirus|s__Twortvirus_twort	LEfSe	A	0.0521483	0.0303959	no
A - H - I	d__Bacteria|p__Cyanobacteriota|c__Cyanophyceae|o__Oscillatoriales|f__Microcoleaceae|g__Arthrospira|s__Arthrospira_platensis	LEfSe	H	0.0520188	0.044738	no
A - H - I	d__Bacteria|p__Bacteroidota|c__Bacteroidia|o__Bacteroidales|f__Bacteroidaceae|g__Bacteroides|s__Bacteroides_sp._L008	LEfSe	A	0.0517928	0.0381323	no
A - H - I	d__Archaea|p__Candidatus_Thermoplasmatota|c__Thermoplasmata|o__Candidatus_Thermoprofundales	LEfSe	H	0.0517345	0.00446931	no
A - H - I	d__Archaea|p__Candidatus_Thermoplasmatota|c__Thermoplasmata|o__Candidatus_Thermoprofundales|f__Candidatus_Thermoprofundales_unclassified	LEfSe	H	0.0517345	0.00446931	no
A - H - I	d__Archaea|p__Candidatus_Thermoplasmatota|c__Thermoplasmata|o__Candidatus_Thermoprofundales|f__Candidatus_Thermoprofundales_unclassified|g__Candidatus_Thermoprofundales_unclassified	LEfSe	H	0.0517345	0.00446931	no
A - H - I	d__Archaea|p__Candidatus_Thermoplasmatota|c__Thermoplasmata|o__Candidatus_Thermoprofundales|f__Candidatus_Thermoprofundales_unclassified|g__Candidatus_Thermoprofundales_unclassified|s__Marine_Group_III_euryarchaeote_CG-Epi2	LEfSe	H	0.0517345	0.00446931	no
A - H - I	d__Bacteria|p__Thermodesulfobacteriota|c__Syntrophobacteria|o__Syntrophobacterales|f__Syntrophobacterales_unclassified|g__Syntrophobacterales_unclassified|s__Syntrophobacterales_bacterium_GWF2_56_9	LEfSe	A	0.051592	0.0284596	no
A - H - I	d__Bacteria|p__Pseudomonadota|c__Alphaproteobacteria|o__Rhodobacterales|f__Paracoccaceae|g__Paracoccus|s__Paracoccus_sp._DMF-8	LEfSe	A	0.0515433	0.0328705	no
A - H - I	d__Bacteria|p__Bacteroidota|c__Cytophagia|o__Cytophagales|f__Hymenobacteraceae|g__Hymenobacter|s__Hymenobacter_sp._5317J-9	LEfSe	I	0.0515205	0.046515	no
A - H - I	d__Bacteria|p__Bacillota|c__Bacilli|o__Bacillales|f__Paenibacillaceae|g__Paenibacillus|s__Paenibacillus_sp._KS1	LEfSe	A	0.0515003	0.0400879	no
A - H - I	d__Bacteria|p__Bacillota|c__Bacilli|o__Bacillales|f__Planococcaceae|g__Planococcus|s__uncultured_Planococcus_sp.	LEfSe	H	0.0514032	0.0171326	no
A - H - I	d__Bacteria|p__Mycoplasmatota|c__Mollicutes|o__Entomoplasmatales|f__Spiroplasmataceae|g__Spiroplasma|s__Spiroplasma_tabanidicola	LEfSe	A	0.0513858	0.0417109	no
A - H - I	d__Bacteria|p__Nitrospirota|c__Nitrospiria|o__Nitrospirales|f__Nitrospiraceae|g__Nitrospira|s__Nitrospira_sp._CG24E	LEfSe	I	0.0513769	0.00800436	no
A - H - I	d__Eukaryota|p__Mucoromycota|c__Mortierellomycetes|o__Mortierellales|f__Mortierellaceae|g__Linnemannia	LEfSe	H	0.0511606	0.0416613	no
A - H - I	d__Bacteria|p__Pseudomonadota|c__Gammaproteobacteria|o__Chromatiales|f__Thioalkalibacteraceae|g__Guyparkeria|s__Guyparkeria_hydrothermalis	LEfSe	H	0.0509291	0.0226626	no
A - H - I	d__Bacteria|p__Bacteroidota|c__Flavobacteriia|o__Flavobacteriales|f__Weeksellaceae|g__Chryseobacterium|s__Chryseobacterium_piperi	LEfSe	A	0.0508807	0.00401561	no
A - H - I	d__Bacteria|p__Bacteroidota|c__Flavobacteriia|o__Flavobacteriales|f__Flavobacteriaceae|g__Flagellimonas|s__Flagellimonas_lutimaris	LEfSe	H	0.0508167	0.0302405	no
A - H - I	d__Bacteria|p__Thermodesulfobacteriota|c__Desulfuromonadia|o__Geobacterales|f__Geobacteraceae|g__Geomonas|s__Geomonas_nitrogeniifigens	LEfSe	A	0.0506895	0.0361152	no
A - H - I	d__Bacteria|p__Bacteroidota|c__Flavobacteriia|o__Flavobacteriales|f__Flavobacteriaceae|g__Flavobacterium|s__Flavobacterium_nitrogenifigens	LEfSe	H	0.0505945	0.0195576	no
A - H - I	d__Bacteria|p__Pseudomonadota|c__Alphaproteobacteria|o__Rhodospirillales|f__Azospirillaceae|g__Azospirillum|s__Azospirillum_endophyticum	LEfSe	A	0.0502561	0.0205038	no
A - H - I	d__Bacteria|p__candidate_division_WOR-3|c__candidate_division_WOR-3_unclassified|o__candidate_division_WOR-3_unclassified|f__candidate_division_WOR-3_unclassified|g__candidate_division_WOR-3_unclassified|s__candidate_division_WOR-3_bacterium_RBG_13_43_14	LEfSe	H	0.0501745	0.0192861	no
A - H - I	d__Bacteria|p__Bacteroidota|c__Cytophagia|o__Cytophagales|f__Hymenobacteraceae|g__Pontibacter|s__Pontibacter_harenae	LEfSe	H	0.0501693	0.0323142	no
A - H - I	d__Bacteria|p__Bacteroidota|c__Flavobacteriia|o__Flavobacteriales|f__Weeksellaceae|g__Chryseobacterium|s__Chryseobacterium_tagetis	LEfSe	H	0.0501388	0.0484994	no
A - H - I	d__Bacteria|p__Candidatus_Uhrbacteria|c__Candidatus_Uhrbacteria_unclassified|o__Candidatus_Uhrbacteria_unclassified|f__Candidatus_Uhrbacteria_unclassified|g__Candidatus_Uhrbacteria_unclassified|s__Candidatus_Uhrbacteria_bacterium_CG_4_9_14_3_um_filter_36_7	LEfSe	A	0.0500993	0.0433618	no
A - H - I	d__Bacteria|p__Pseudomonadota|c__Alphaproteobacteria|o__Hyphomicrobiales|f__Phreatobacteraceae|g__Phreatobacter|s__Phreatobacter_cathodiphilus	LEfSe	A	0.0500908	0.0149141	no
A - H - I	d__Bacteria|p__Pseudomonadota|c__Alphaproteobacteria|o__Hyphomicrobiales|f__Rhizobiaceae|g__Pseudorhizobium|s__Pseudorhizobium_tarimense	LEfSe	A	0.0500815	0.0381323	no
A - H - I	d__Bacteria|p__Pseudomonadota|c__Alphaproteobacteria|o__Hyphomicrobiales|f__Rhizobiaceae|g__Rhizobium|s__Rhizobium_sp._Leaf262	LEfSe	A	0.0499142	0.0135312	no
A - H - I	d__Bacteria|p__Pseudomonadota|c__Betaproteobacteria|o__Burkholderiales|f__Oxalobacteraceae|g__Undibacterium|s__Undibacterium_rivi	LEfSe	A	0.0498444	0.0231559	no
A - H - I	d__Bacteria|p__Verrucomicrobiota|c__Verrucomicrobiota_unclassified|o__Verrucomicrobiota_unclassified|f__Verrucomicrobiota_unclassified|g__Verrucomicrobiota_unclassified|s__Verrucomicrobia_bacterium_12-59-8	LEfSe	H	0.0496297	0.0280394	no
A - H - I	d__Eukaryota|p__Basidiomycota|c__Tremellomycetes|o__Tremellales	LEfSe	A	0.0496023	0.0369362	no
A - H - I	d__Bacteria|p__Campylobacterota|c__Epsilonproteobacteria|o__Campylobacterales|f__Sulfurimonadaceae|g__Sulfurimonas|s__uncultured_Sulfurimonas_sp.	LEfSe	I	0.0495518	0.0322101	no
A - H - I	d__Bacteria|p__Pseudomonadota|c__Gammaproteobacteria|o__Chromatiales|f__Chromatiaceae|g__Rheinheimera|s__Rheinheimera_aquimaris	LEfSe	A	0.0491288	0.0327701	no
A - H - I	d__Bacteria|p__Pseudomonadota|c__Gammaproteobacteria|o__Steroidobacterales|f__Steroidobacteraceae|g__Povalibacter|s__Povalibacter_uvarum	LEfSe	I	0.0490546	0.0461842	no
A - H - I	d__Bacteria|p__Bacillota|c__Bacilli|o__Lactobacillales|f__Lactobacillaceae|g__Limosilactobacillus|s__Limosilactobacillus_agrestimuris	LEfSe	A	0.0490317	0.0416179	no
A - H - I	d__Bacteria|p__Pseudomonadota|c__Gammaproteobacteria|o__Alteromonadales|f__Alteromonadales_unclassified|g__Motilimonas	LEfSe	H	0.0489898	0.0302405	no
A - H - I	d__Bacteria|p__Bacteroidota|c__Sphingobacteriia|o__Sphingobacteriales|f__Sphingobacteriaceae|g__Sphingobacterium|s__Sphingobacterium_sp._WM	LEfSe	I	0.048873	0.0178614	no
A - H - I	d__Bacteria|p__Actinomycetota|c__Actinomycetes|o__Propionibacteriales|f__Propionibacteriaceae|g__Nigerium	LEfSe	A	0.048667	0.0120035	no
A - H - I	d__Bacteria|p__Actinomycetota|c__Actinomycetes|o__Propionibacteriales|f__Propionibacteriaceae|g__Nigerium|s__Nigerium_massiliense	LEfSe	A	0.048667	0.0120035	no
A - H - I	d__Viruses|p__Uroviricota|c__Caudoviricetes|o__Caudoviricetes_unclassified|f__Caudoviricetes_unclassified|g__Caudoviricetes_unclassified|s__Streptococcus_phage_OlisA3	LEfSe	H	0.0485572	0.0409146	no
A - H - I	d__Bacteria|p__Actinomycetota|c__Actinomycetes|o__Kitasatosporales|f__Streptomycetaceae|g__Streptomyces|s__Streptomyces_sp._QL37	LEfSe	A	0.0484606	0.0146866	no
A - H - I	d__Bacteria|p__Pseudomonadota|c__Gammaproteobacteria|o__Alteromonadales|f__Shewanellaceae|g__Shewanella|s__Shewanella_maritima	LEfSe	A	0.0484531	0.0278672	no
A - H - I	d__Bacteria|p__Cyanobacteriota|c__Cyanophyceae|o__Nostocales|f__Rivulariaceae|g__Rivularia|s__Rivularia_sp._IAM_M-261	LEfSe	A	0.048201	0.0161548	no
A - H - I	d__Bacteria|p__Candidatus_Woesebacteria|c__Candidatus_Woesebacteria_unclassified|o__Candidatus_Woesebacteria_unclassified|f__Candidatus_Woesebacteria_unclassified|g__Candidatus_Woesebacteria_unclassified|s__Candidatus_Woesebacteria_bacterium_GW2011_GWF1_40_24	LEfSe	A	0.0480017	0.0254068	no
A - H - I	d__Bacteria|p__Pseudomonadota|c__Alphaproteobacteria|o__Hyphomicrobiales|f__Phyllobacteriaceae|g__Aquamicrobium|s__Aquamicrobium_defluvii	LEfSe	A	0.0479404	0.0415116	no
A - H - I	d__Bacteria|p__Bacteroidota|c__Flavobacteriia|o__Flavobacteriales|f__Weeksellaceae|g__Chryseobacterium|s__Chryseobacterium_taihuense	LEfSe	I	0.0477396	0.0441945	no
A - H - I	d__Bacteria|p__Actinomycetota|c__Actinomycetes|o__Mycobacteriales|f__Nocardiaceae|g__Nocardia|s__Nocardia_takedensis	LEfSe	A	0.0475789	0.0436096	no
A - H - I	d__Bacteria|p__Bacteroidota|c__Sphingobacteriia|o__Sphingobacteriales|f__Sphingobacteriaceae|g__Mucilaginibacter|s__Mucilaginibacter_glaciei	LEfSe	I	0.0475506	0.0262691	no
A - H - I	d__Bacteria|p__Bacteroidota|c__Saprospiria|o__Saprospirales|f__Lewinellaceae|g__Neolewinella|s__Neolewinella_agarilytica	LEfSe	I	0.0473262	0.0270674	no
A - H - I	d__Bacteria|p__Pseudomonadota|c__Gammaproteobacteria|o__Pseudomonadales|f__Pseudohongiellaceae|g__Pseudohongiella|s__Pseudohongiella_spirulinae	LEfSe	A	0.0463453	0.0129857	no
A - H - I	d__Bacteria|p__Pseudomonadota|c__Alphaproteobacteria|o__Rhodobacterales|f__Roseobacteraceae|g__Roseovarius|s__Roseovarius_lutimaris	LEfSe	A	0.0462709	0.0418802	no
A - H - I	d__Bacteria|p__Pseudomonadota|c__Alphaproteobacteria|o__Maricaulales|f__Robiginitomaculaceae|g__Hellea	LEfSe	A	0.0461397	0.0483115	no
A - H - I	d__Bacteria|p__Pseudomonadota|c__Alphaproteobacteria|o__Maricaulales|f__Robiginitomaculaceae|g__Hellea|s__Hellea_balneolensis	LEfSe	A	0.0461397	0.0483115	no
A - H - I	d__Bacteria|p__Pseudomonadota|c__Gammaproteobacteria|o__Chromatiales|f__Sedimenticolaceae|g__Sedimenticola|s__Sedimenticola_thiotaurini	LEfSe	H	0.0457911	0.0138415	no
A - H - I	d__Bacteria|p__Pseudomonadota|c__Alphaproteobacteria|o__Rhodobacterales|f__Paracoccaceae|g__Mangrovicoccus|s__Mangrovicoccus_sp._HB161399	LEfSe	A	0.0457853	0.0243651	no
A - H - I	d__Bacteria|p__Pseudomonadota|c__Gammaproteobacteria|o__Pseudomonadales|f__Marinobacteraceae|g__Marinobacter|s__Marinobacter_sp._CA1	LEfSe	A	0.0457538	0.0339205	no
A - H - I	d__Bacteria|p__Candidatus_Roizmanbacteria|c__Candidatus_Roizmanbacteria_unclassified|o__Candidatus_Roizmanbacteria_unclassified|f__Candidatus_Roizmanbacteria_unclassified|g__Candidatus_Roizmanbacteria_unclassified|s__Candidatus_Roizmanbacteria_bacterium_CG22_combo_CG10-13_8_21_14_all_35_9	LEfSe	A	0.0454063	0.0486408	no
A - H - I	d__Bacteria|p__Pseudomonadota|c__Gammaproteobacteria|o__Chromatiales|f__Ectothiorhodospiraceae|g__Arhodomonas	LEfSe	H	0.0453747	0.0250221	no
A - H - I	d__Bacteria|p__Pseudomonadota|c__Gammaproteobacteria|o__Chromatiales|f__Ectothiorhodospiraceae|g__Arhodomonas|s__Arhodomonas_aquaeolei	LEfSe	H	0.0453747	0.0250221	no
A - H - I	d__Bacteria|p__Pseudomonadota|c__Gammaproteobacteria|o__Pasteurellales|f__Pasteurellaceae|g__Pasteurellaceae_unclassified|s__Pasteurellaceae_bacterium_Phil31	LEfSe	H	0.0453491	0.0378865	no
A - H - I	d__Bacteria|p__Pseudomonadota|c__Gammaproteobacteria|o__Nevskiales|f__Nevskiaceae|g__Nevskiaceae_unclassified	LEfSe	A	0.0453285	0.0300687	no
A - H - I	d__Bacteria|p__Pseudomonadota|c__Gammaproteobacteria|o__Nevskiales|f__Nevskiaceae|g__Nevskiaceae_unclassified|s__Nevskiaceae_bacterium	LEfSe	A	0.0453285	0.0300687	no
A - H - I	d__Bacteria|p__Pseudomonadota|c__Alphaproteobacteria|o__Sphingomonadales|f__Sphingomonadaceae|g__Citromicrobium	LEfSe	A	0.0452798	0.0402364	no
A - H - I	d__Eukaryota|p__Chytridiomycota|c__Chytridiomycetes|o__Chytridiomycetes_unclassified	LEfSe	A	0.0452782	0.048496	no
A - H - I	d__Bacteria|p__Bacillota|c__Bacilli|o__Lactobacillales|f__Enterococcaceae|g__Enterococcus|s__Enterococcus_sp._DIV0212c	LEfSe	H	0.0451981	0.0395726	no
A - H - I	d__Bacteria|p__Actinomycetota|c__Actinomycetes|o__Pseudonocardiales|f__Pseudonocardiaceae|g__Crossiella	LEfSe	A	0.0450123	0.0335148	no
A - H - I	d__Bacteria|p__Bacillota|c__Bacilli|o__Bacillales|f__Bacillaceae|g__Metabacillus|s__Metabacillus_flavus	LEfSe	A	0.0449755	0.0163787	no
A - H - I	d__Bacteria|p__Pseudomonadota|c__Betaproteobacteria|o__Burkholderiales|f__Burkholderiaceae|g__Paraburkholderia|s__Paraburkholderia_sp._SARCC-3016	LEfSe	I	0.0449195	0.0465713	no
A - H - I	d__Bacteria|p__Pseudomonadota|c__Gammaproteobacteria|o__Pasteurellales|f__Pasteurellaceae|g__Pasteurella|s__Pasteurella_langaaensis	LEfSe	I	0.044723	0.0299797	no
A - H - I	d__Bacteria|p__Pseudomonadota|c__Gammaproteobacteria|o__Alteromonadales|f__Pseudoalteromonadaceae|g__Pseudoalteromonas|s__Pseudoalteromonas_sp.	LEfSe	A	0.0444302	0.0412749	no
A - H - I	d__Bacteria|p__Bacteroidota|c__Flavobacteriia|o__Flavobacteriales|f__Flavobacteriaceae|g__Flavobacterium|s__Flavobacterium_covae	LEfSe	H	0.0444023	0.0404658	no
A - H - I	d__Bacteria|p__Bacteroidota|c__Flavobacteriia|o__Flavobacteriales|f__Flavobacteriaceae|g__Flagellimonas|s__Flagellimonas_aurea	LEfSe	I	0.0442107	0.0265923	no
A - H - I	d__Bacteria|p__Actinomycetota|c__Acidimicrobiia|o__Acidimicrobiales|f__Acidimicrobiaceae|g__Acidithrix|s__Acidithrix_ferrooxidans	LEfSe	H	0.0439577	0.0285823	no
A - H - I	d__Bacteria|p__Pseudomonadota|c__Gammaproteobacteria|o__Gammaproteobacteria_unclassified|f__Gammaproteobacteria_unclassified|g__Gammaproteobacteria_unclassified|s__Solemya_pervernicosa_gill_symbiont	LEfSe	A	0.0437693	0.0295434	no
A - H - I	d__Archaea|p__Euryarchaeota|c__Methanobacteria|o__Methanobacteriales|f__Methanobacteriaceae|g__Methanobacterium|s__Methanobacterium_sp._Maddingley_MBC34	LEfSe	H	0.0437229	0.0496072	no
A - H - I	d__Bacteria|p__Bacillota|c__Bacilli|o__Bacillales|f__Bacillaceae|g__Pradoshia|s__Pradoshia_sp._D12	LEfSe	H	0.043428	0.0280394	no
A - H - I	d__Bacteria|p__Pseudomonadota|c__Gammaproteobacteria|o__Vibrionales|f__Vibrionaceae|g__Vibrio|s__Vibrio_ishigakensis	LEfSe	A	0.0431285	0.0260523	no
A - H - I	d__Bacteria|p__Pseudomonadota|c__Betaproteobacteria|o__Burkholderiales|f__Comamonadaceae|g__Ottowia|s__Ottowia_beijingensis	LEfSe	H	0.043074	0.0445928	no
A - H - I	d__Bacteria|p__Candidatus_Sungiibacteriota|c__Candidatus_Sungiibacteriota_unclassified|o__Candidatus_Sungiibacteriota_unclassified|f__Candidatus_Sungiibacteriota_unclassified|g__Candidatus_Sungiibacteriota_unclassified|s__Candidatus_Sungbacteria_bacterium_RIFCSPLOWO2_01_FULL_47_10	LEfSe	H	0.0425942	0.0397411	no
A - H - I	d__Bacteria|p__Candidatus_Paceibacterota|c__Candidatus_Paceibacterota_unclassified|o__Candidatus_Paceibacterota_unclassified|f__Candidatus_Paceibacterota_unclassified|g__Candidatus_Paceibacterota_unclassified|s__Candidatus_Pacebacteria_bacterium_GW2011_GWA1_46_10	LEfSe	I	0.0424878	0.0322085	no
A - H - I	d__Bacteria|p__Actinomycetota|c__Actinomycetes|o__Actinomycetales|f__Actinomycetaceae|g__Actinomyces|s__Actinomyces_sp._oral_taxon_414	LEfSe	H	0.0423166	0.017492	no
A - H - I	d__Bacteria|p__Pseudomonadota|c__Betaproteobacteria|o__Neisseriales|f__Chromobacteriaceae|g__Chromobacterium|s__Chromobacterium_alticapitis	LEfSe	A	0.0421175	0.0443076	no
A - H - I	d__Bacteria|p__Pseudomonadota|c__Gammaproteobacteria|o__Oceanospirillales|f__Halomonadaceae|g__Halomonas|s__Halomonas_alkalicola	LEfSe	A	0.0419799	0.0493257	no
A - H - I	d__Bacteria|p__Bacillota|c__Bacilli|o__Lactobacillales|f__Streptococcaceae|g__Streptococcus|s__Streptococcus_caballi	LEfSe	H	0.041432	0.0356279	no
A - H - I	d__Bacteria|p__Pseudomonadota|c__Alphaproteobacteria|o__Hyphomicrobiales|f__Beijerinckiaceae|g__Methylovirgula|s__uncultured_Methylovirgula_sp.	LEfSe	A	0.041306	0.0465713	no
A - H - I	d__Bacteria|p__Pseudomonadota|c__Gammaproteobacteria|o__Moraxellales|f__Moraxellaceae|g__Psychrobacter|s__Psychrobacter_sp._APC_3279	LEfSe	H	0.0411617	0.023208	no
A - H - I	d__Bacteria|p__Cyanobacteriota|c__Cyanophyceae|o__Synechococcales|f__Coelosphaeriaceae|g__Woronichinia	LEfSe	H	0.0410126	0.0452656	no
A - H - I	d__Bacteria|p__Cyanobacteriota|c__Cyanophyceae|o__Synechococcales|f__Coelosphaeriaceae|g__Woronichinia|s__Woronichinia_naegeliana	LEfSe	H	0.0410126	0.0452656	no
A - H - I	d__Bacteria|p__Actinomycetota|c__Actinomycetes|o__Micrococcales|f__Promicromonosporaceae|g__Promicromonospora|s__Promicromonospora_citrea	LEfSe	A	0.0399924	0.0151962	no
A - H - I	d__Bacteria|p__Pseudomonadota|c__Alphaproteobacteria|o__Hyphomicrobiales|f__Phyllobacteriaceae|g__Aquamicrobium|s__Aquamicrobium_sp.	LEfSe	A	0.0397724	0.0118921	no
A - H - I	d__Bacteria|p__Bacteroidota|c__Flavobacteriia|o__Flavobacteriales|f__Ichthyobacteriaceae	LEfSe	A	0.0397066	0.0131809	no
A - H - I	d__Bacteria|p__Bacteroidota|c__Flavobacteriia|o__Flavobacteriales|f__Ichthyobacteriaceae|g__Ichthyobacterium	LEfSe	A	0.0397066	0.0131809	no
A - H - I	d__Bacteria|p__Bacteroidota|c__Flavobacteriia|o__Flavobacteriales|f__Ichthyobacteriaceae|g__Ichthyobacterium|s__Ichthyobacterium_seriolicida	LEfSe	A	0.0397066	0.0131809	no
A - H - I	d__Bacteria|p__Bacteroidota|c__Flavobacteriia|o__Flavobacteriales|f__Flavobacteriaceae|g__Salinimicrobium|s__Salinimicrobium_sediminis	LEfSe	A	0.0396383	0.0260505	no
A - H - I	d__Bacteria|p__Bacteria_unclassified|c__Deltaproteobacteria|o__Deltaproteobacteria_unclassified|f__Deltaproteobacteria_unclassified|g__Deltaproteobacteria_unclassified|s__Deltaproteobacteria_bacterium_HGW-Deltaproteobacteria-7	LEfSe	H	0.0394827	0.0174818	no
A - H - I	d__Bacteria|p__Pseudomonadota|c__Alphaproteobacteria|o__Kordiimonadales|f__Kordiimonadaceae|g__Kordiimonas|s__Kordiimonas_laminariae	LEfSe	A	0.039447	0.0486318	no
A - H - I	d__Bacteria|p__Pseudomonadota|c__Gammaproteobacteria|o__Oceanospirillales|f__Oceanospirillaceae|g__Neptunomonas|s__Neptunomonas_japonica	LEfSe	A	0.0392433	0.024721	no
A - H - I	d__Bacteria|p__Pseudomonadota|c__Alphaproteobacteria|o__Caulobacterales|f__Caulobacteraceae|g__Brevundimonas|s__Brevundimonas_sp._PAMC22021	LEfSe	A	0.0387986	0.0370469	no
A - H - I	d__Bacteria|p__Candidatus_Omnitrophota|c__Candidatus_Omnitrophota_unclassified|o__Candidatus_Omnitrophota_unclassified|f__Candidatus_Omnitrophota_unclassified|g__Candidatus_Omnitrophota_unclassified|s__Omnitrophica_WOR_2_bacterium_RIFCSPHIGHO2_02_FULL_67_20	LEfSe	A	0.0380447	0.0399826	no
A - H - I	d__Bacteria|p__Bacillota|c__Bacilli|o__Bacillales|f__Bacillaceae|g__Lentibacillus|s__Lentibacillus_amyloliquefaciens	LEfSe	A	0.0372665	0.0366134	no
A - H - I	d__Bacteria|p__Pseudomonadota|c__Alphaproteobacteria|o__Hyphomicrobiales|f__Rhizobiaceae|g__Rhizobium|s__Rhizobium_sp._EC-SD404	LEfSe	A	0.0363057	0.0488515	no
A - H - I	d__Archaea|p__Euryarchaeota|c__Euryarchaeota_unclassified|o__Euryarchaeota_unclassified|f__Euryarchaeota_unclassified|g__Euryarchaeota_unclassified|s__Euryarchaeota_archaeon_ADurb.Bin023	LEfSe	H	0.0357541	0.0493257	no
A - H - I	d__Bacteria|p__Elusimicrobiota|c__Elusimicrobiota_unclassified|o__Elusimicrobiota_unclassified|f__Elusimicrobiota_unclassified|g__Elusimicrobiota_unclassified|s__Elusimicrobia_bacterium_RIFCSPHIGHO2_02_FULL_61_10	LEfSe	H	0.0351393	0.0152208	no
A - H - I	d__Bacteria|p__Actinomycetota|c__Actinomycetes|o__Micrococcales|f__Microbacteriaceae|g__Microbacterium|s__Microbacterium_sp._AB	LEfSe	H	0.0299218	0.0393735	no

## Sheet: Table S7
Supplementary Table 7. ReporterScore difference analysis of enrichment pathway among SAE1000 group, CGA400 group and CON group
ID	Description	K_num	Exist_K_num	Significant_K_num	Z_score	BG_Mean	BG_Sd	ReporterScore	p.value	p.adjust
map00680	Methane metabolism	195	143	69	13.5907	3.05222	1.0378	10.1546	0.0002	0.00605714
map05171	Coronavirus disease - COVID-19	219	28	27	11.5499	1.32574	1.07352	9.52396	0.0002	0.00605714
map03010	Ribosome	143	85	31	10.1166	2.35444	1.08377	7.16221	0.0002	0.00605714
map02040	Flagellar assembly	55	50	11	6.89507	1.79516	1.05295	4.84345	0.0002	0.00605714
map03020	RNA polymerase	66	19	12	6.0967	1.0884	1.06768	4.69084	0.0002	0.00605714
map01200	Carbon metabolism	365	255	58	7.74389	4.04703	1.03151	3.58393	0.0002	0.00605714
map03030	DNA replication	60	33	11	5.20858	1.48136	1.06854	3.48813	0.0002	0.00605714
map00970	Aminoacyl-tRNA biosynthesis	66	37	6	4.91048	1.55826	1.06469	3.14853	0.0008	0.0212
map03050	Proteasome	49	4	3	3.6217	0.481635	1.06903	2.93729	0.001	0.0235556
map03022	Basal transcription factors	36	5	3	3.54419	0.578047	1.05464	2.81248	0.003	0.0578182
map05203	Viral carcinogenesis	174	4	3	3.42013	0.498221	1.07449	2.71935	0.0024	0.05088
map00051	Fructose and mannose metabolism	112	84	9	5.0532	2.35691	1.05026	2.56727	0.0064	0.09328
map00633	Nitrotoluene degradation	22	17	6	3.73441	1.06343	1.07137	2.49305	0.006	0.09328
map05167	Kaposi sarcoma-associated herpesvirus infection	169	3	2	3.10479	0.430813	1.07502	2.48737	0.0036	0.0636
map00280	Valine, leucine and isoleucine degradation	69	45	7	4.24198	1.73298	1.06248	2.36146	0.0066	0.09328
map05131	Shigellosis	205	6	2	3.10538	0.647777	1.05067	2.33907	0.0096	0.119718
map05017	Spinocerebellar ataxia	116	3	2	3.00307	0.476804	1.08712	2.32382	0.0074	0.09805
map00310	Lysine degradation	98	29	2	3.71161	1.38075	1.08137	2.15547	0.0154	0.181378
map00626	Naphthalene degradation	29	7	2	2.92746	0.688699	1.06517	2.10178	0.0178	0.198611
map00830	Retinol metabolism	50	3	1	2.57098	0.434237	1.07751	1.98304	0.019	0.2014
map02030	Bacterial chemotaxis	26	26	3	3.25758	1.27732	1.08156	1.83094	0.0328	0.331124
map04910	Insulin signaling pathway	88	6	2	2.56051	0.619241	1.08725	1.78548	0.0358	0.344982
map04151	PI3K-Akt signaling pathway	268	4	2	2.41102	0.498176	1.07467	1.77993	0.0388	0.357635
map05132	Salmonella infection	217	6	2	2.41051	0.632714	1.06779	1.66494	0.049	0.432833
map00410	beta-Alanine metabolism	46	25	6	2.96866	1.27238	1.07472	1.57833	0.0566	0.461508
map04141	Protein processing in endoplasmic reticulum	144	3	1	2.1001	0.429186	1.06634	1.56696	0.0562	0.461508
map00624	Polycyclic aromatic hydrocarbon degradation	43	4	1	2.17416	0.510631	1.08721	1.53008	0.059	0.463259
map00300	Lysine biosynthesis	48	38	7	3.06878	1.55215	1.06592	1.42283	0.0726	0.549686
map01503	Cationic antimicrobial peptide (CAMP) resistance	54	48	4	3.16301	1.77081	1.0816	1.28717	0.1018	0.680823
map03420	Nucleotide excision repair	61	12	2	2.26977	0.885495	1.07749	1.28472	0.101	0.680823
map04714	Thermogenesis	188	6	2	1.98959	0.623576	1.07914	1.26583	0.1038	0.680823
map00980	Metabolism of xenobiotics by cytochrome P450	34	4	1	1.86382	0.526522	1.08771	1.22946	0.1064	0.680823
map00522	Biosynthesis of 12-, 14- and 16-membered macrolides	59	3	1	1.72186	0.418527	1.06569	1.223	0.1124	0.680823
map04152	AMPK signaling pathway	85	7	3	1.96862	0.655632	1.07906	1.21679	0.1092	0.680823
map04621	NOD-like receptor signaling pathway	145	3	0	1.71346	0.461139	1.05036	1.19228	0.1094	0.680823
map00760	Nicotinate and nicotinamide metabolism	95	51	7	3.11399	1.83708	1.0798	1.18254	0.121	0.693297
map00640	Propanoate metabolism	97	72	12	3.41504	2.1484	1.08099	1.17175	0.1172	0.690178
map01240	Biosynthesis of cofactors	375	276	41	5.40464	4.2332	1.02765	1.13992	0.1276	0.711874
map00253	Tetracycline biosynthesis	17	4	0	1.63183	0.522355	1.06579	1.04098	0.1536	0.780362
map01230	Biosynthesis of amino acids	238	192	25	4.58878	3.49585	1.0514	1.0395	0.1546	0.780362
map00642	Ethylbenzene degradation	16	4	0	1.63308	0.521599	1.08743	1.02212	0.1512	0.780362
map00572	Arabinogalactan biosynthesis - Mycobacterium	12	4	1	1.58397	0.51693	1.05574	1.0107	0.1518	0.780362
map00770	Pantothenate and CoA biosynthesis	45	35	8	2.52895	1.52159	1.05983	0.950485	0.1662	0.819405
map04931	Insulin resistance	74	4	1	1.4911	0.502531	1.06747	0.926091	0.1772	0.835751
map02060	Phosphotransferase system (PTS)	72	64	3	3.01927	2.01622	1.08538	0.924148	0.1774	0.835751
map00997	Biosynthesis of various other secondary metabolites	42	9	2	1.67852	0.778124	1.05507	0.853404	0.193	0.889478
map03450	Non-homologous end-joining	19	3	1	1.30689	0.455408	1.05796	0.804836	0.2098	0.935396
map00790	Folate biosynthesis	84	55	8	2.74802	1.88461	1.08668	0.794543	0.2156	0.935396
map00130	Ubiquinone and other terpenoid-quinone biosynthesis	59	36	1	2.35099	1.52013	1.06285	0.781725	0.2162	0.935396
map00511	Other glycan degradation	22	15	1	1.78529	1.00427	1.07519	0.7264	0.2324	0.957469
map00440	Phosphonate and phosphinate metabolism	44	17	0	1.81696	1.04052	1.06943	0.726027	0.2338	0.957469
map04936	Alcoholic liver disease	105	4	2	1.25251	0.496245	1.07951	0.700563	0.243	0.957469
map05130	Pathogenic Escherichia coli infection	152	4	1	1.2475	0.509213	1.06403	0.693862	0.248	0.957469
map04146	Peroxisome	74	10	3	1.55061	0.810171	1.07822	0.686726	0.2456	0.957469
map00907	Pinene, camphor and geraniol degradation	25	9	1	1.46798	0.748238	1.06874	0.673454	0.2484	0.957469
map03430	Mismatch repair	44	27	2	1.99268	1.3135	1.06497	0.637751	0.2644	0.978124
map00710	Carbon fixation in photosynthetic organisms	36	23	3	1.92024	1.24497	1.06409	0.634609	0.2608	0.978124
map00430	Taurine and hypotaurine metabolism	29	14	2	1.63293	0.959274	1.07438	0.627022	0.2676	0.978124
map05133	Pertussis	79	9	0	1.38972	0.769762	1.07109	0.578811	0.2836	0.9998
map00860	Porphyrin metabolism	139	76	13	2.81919	2.23567	1.07507	0.542778	0.2972	0.9998
map03018	RNA degradation	79	24	4	1.8161	1.25973	1.0727	0.51867	0.3028	0.9998
map00053	Ascorbate and aldarate metabolism	62	28	2	1.88478	1.32898	1.07499	0.517019	0.3096	0.9998
map00010	Glycolysis / Gluconeogenesis	106	80	10	2.83586	2.28936	1.06437	0.513455	0.3042	0.9998
map00524	Neomycin, kanamycin and gentamicin biosynthesis	58	3	0	0.962122	0.460388	1.07823	0.46533	0.3224	0.9998
map00405	Phenazine biosynthesis	16	4	0	0.995121	0.497381	1.079	0.461299	0.3244	0.9998
map04066	HIF-1 signaling pathway	76	11	2	1.32273	0.834606	1.07026	0.456081	0.3214	0.9998
map03410	Base excision repair	52	22	3	1.63645	1.20429	1.07055	0.403681	0.3436	0.9998
map01232	Nucleotide metabolism	123	78	8	2.60714	2.23247	1.07542	0.348395	0.3704	0.9998
map00920	Sulfur metabolism	109	64	4	2.38908	2.02083	1.06094	0.347099	0.3646	0.9998
map00364	Fluorobenzoate degradation	18	4	1	0.861956	0.49227	1.0711	0.345147	0.3702	0.9998
map05022	Pathways of neurodegeneration - multiple diseases	368	8	2	1.05545	0.709398	1.09306	0.316592	0.3804	0.9998
map00998	Biosynthesis of various antibiotics	74	12	1	1.17335	0.873293	1.06391	0.282031	0.3916	0.9998
map00350	Tyrosine metabolism	84	36	3	1.81574	1.52154	1.07173	0.274504	0.395	0.9998
map05010	Alzheimer disease	300	5	1	0.81516	0.543403	1.07615	0.252527	0.4082	0.9998
map00071	Fatty acid degradation	59	23	3	1.49354	1.23549	1.08391	0.238075	0.4088	0.9998
map05016	Huntington disease	229	6	1	0.879523	0.627469	1.08481	0.232348	0.419	0.9998
map04217	Necroptosis	96	5	0	0.819723	0.585288	1.08228	0.216611	0.4204	0.9998
map01053	Biosynthesis of siderophore group nonribosomal peptides	36	20	1	1.34355	1.12773	1.07131	0.201458	0.4212	0.9998
map00240	Pyrimidine metabolism	111	71	7	2.33004	2.13723	1.06997	0.180207	0.432	0.9998
map00562	Inositol phosphate metabolism	76	23	0	1.4146	1.2246	1.06091	0.17909	0.438	0.9998
map05012	Parkinson disease	209	7	2	0.890745	0.699336	1.07294	0.178398	0.4308	0.9998
map00470	D-Amino acid metabolism	55	31	2	1.56104	1.37995	1.08094	0.16753	0.4374	0.9998
map05415	Diabetic cardiomyopathy	160	10	2	0.96187	0.799119	1.06578	0.152706	0.446	0.9998
map01523	Antifolate resistance	26	4	0	0.681597	0.51847	1.07284	0.152051	0.446	0.9998
map00040	Pentose and glucuronate interconversions	89	58	5	2.08518	1.94723	1.05406	0.130872	0.4472	0.9998
map03060	Protein export	39	22	4	1.34876	1.21801	1.06836	0.122384	0.4478	0.9998
map01057	Biosynthesis of type II polyketide products	73	5	0	0.683451	0.561572	1.06464	0.11448	0.4684	0.9998
map00543	Exopolysaccharide biosynthesis	73	9	1	0.819338	0.734808	1.08382	0.0779926	0.479	0.9998
map04122	Sulfur relay system	29	20	2	1.18363	1.14138	1.09006	0.038758	0.4956	0.9998
map01210	2-Oxocarboxylic acid metabolism	82	44	6	1.70958	1.68645	1.06222	0.0217699	0.487	0.9998
map00982	Drug metabolism - cytochrome P450	25	5	1	0.5814	0.565381	1.07782	0.0148625	0.4932	0.9998
map00670	One carbon pool by folate	42	23	1	1.2019	1.22433	1.07842	-0.0208047	0.5106	0.9998
map05152	Tuberculosis	131	4	0	0.473584	0.512221	1.05712	-0.0365497	0.5124	0.9998
map05206	MicroRNAs in cancer	245	3	0	0.411878	0.456107	1.05287	-0.0420075	0.522	0.9998
map05120	Epithelial cell signaling in Helicobacter pylori infection	91	5	0	0.496362	0.572427	1.08003	-0.0704278	0.5226	0.9998
map05150	Staphylococcus aureus infection	74	8	0	0.623777	0.705036	1.08134	-0.0751468	0.5424	0.9998
map00621	Dioxin degradation	31	7	2	0.608275	0.692723	1.06999	-0.0789242	0.5372	0.9998
map00650	Butanoate metabolism	114	79	11	2.20303	2.28791	1.06093	-0.0800044	0.5286	0.9998
map00903	Limonene degradation	9	3	0	0.310282	0.428886	1.08164	-0.109653	0.5456	0.9998
map00510	N-Glycan biosynthesis	48	4	1	0.385924	0.505649	1.07147	-0.111739	0.553	0.9998
map04070	Phosphatidylinositol signaling system	55	3	0	0.307709	0.429715	1.06686	-0.11436	0.5442	0.9998
map02026	Biofilm formation - Escherichia coli	61	50	1	1.70173	1.8275	1.06138	-0.118501	0.547	0.9998
map05417	Lipid and atherosclerosis	160	3	0	0.260316	0.417277	1.09945	-0.142763	0.5558	0.9998
map00627	Aminobenzoate degradation	89	29	1	1.19563	1.36981	1.07183	-0.162514	0.568	0.9998
map00052	Galactose metabolism	78	52	4	1.65606	1.83306	1.06607	-0.166034	0.5684	0.9998
map00290	Valine, leucine and isoleucine biosynthesis	19	15	1	0.83025	1.01094	1.07281	-0.168424	0.5696	0.9998
map00362	Benzoate degradation	106	47	4	1.54	1.74038	1.07507	-0.186384	0.5752	0.9998
map00332	Carbapenem biosynthesis	19	8	2	0.503093	0.711797	1.07261	-0.194575	0.5792	0.9998
map00513	Various types of N-glycan biosynthesis	55	3	0	0.198931	0.422297	1.09054	-0.204822	0.5826	0.9998
map02025	Biofilm formation - Pseudomonas aeruginosa	90	49	5	1.52788	1.76492	1.06724	-0.222114	0.5906	0.9998
map01051	Biosynthesis of ansamycins	32	12	0	0.635692	0.888496	1.07671	-0.234793	0.6024	0.9998
map00791	Atrazine degradation	16	7	0	0.444517	0.700182	1.05368	-0.242639	0.596	0.9998
map00930	Caprolactam degradation	22	10	0	0.514573	0.803405	1.0646	-0.271305	0.609	0.9998
map00622	Xylene degradation	34	12	2	0.606944	0.901923	1.05578	-0.279393	0.612	0.9998
map00030	Pentose phosphate pathway	88	66	6	1.76844	2.06911	1.06843	-0.281413	0.6148	0.9998
map00983	Drug metabolism - other enzymes	32	18	3	0.771247	1.07409	1.05331	-0.287516	0.6258	0.9998
map05134	Legionellosis	69	8	0	0.39823	0.712126	1.08827	-0.288434	0.615	0.9998
map00540	Lipopolysaccharide biosynthesis	62	53	4	1.57229	1.87511	1.0498	-0.288456	0.6166	0.9998
map04626	Plant-pathogen interaction	86	5	0	0.256156	0.583589	1.08161	-0.302727	0.6284	0.9998
map01059	Biosynthesis of enediyne antibiotics	73	14	0	0.586487	0.927016	1.06837	-0.318736	0.626	0.9998
map03320	PPAR signaling pathway	63	6	2	0.238053	0.606545	1.07335	-0.34331	0.643	0.9998
map00365	Furfural degradation	8	3	1	0.0459553	0.428824	1.10595	-0.346189	0.6422	0.9998
map00999	Biosynthesis of various plant secondary metabolites	73	5	0	0.161188	0.552788	1.06577	-0.367435	0.648	0.9998
map04964	Proximal tubule bicarbonate reclamation	14	3	0	0.0382132	0.454721	1.07035	-0.389132	0.6558	0.9998
map05418	Fluid shear stress and atherosclerosis	99	4	0	0.0795748	0.497549	1.06754	-0.391529	0.6588	0.9998
map00900	Terpenoid backbone biosynthesis	63	29	6	0.933732	1.37089	1.08	-0.404772	0.6572	0.9998
map00910	Nitrogen metabolism	68	35	0	1.0584	1.50892	1.07723	-0.418219	0.6644	0.9998
map05100	Bacterial invasion of epithelial cells	76	3	0	-0.0506455	0.409857	1.08249	-0.425411	0.6754	0.9998
map00603	Glycosphingolipid biosynthesis - globo and isoglobo series	16	3	0	-0.0372397	0.432648	1.07917	-0.435418	0.6794	0.9998
map04727	GABAergic synapse	69	3	1	-0.0667308	0.423196	1.07087	-0.457502	0.6832	0.9998
map00340	Histidine metabolism	47	28	2	0.834433	1.33418	1.06391	-0.46973	0.6854	0.9998
map00571	Lipoarabinomannan (LAM) biosynthesis	14	5	0	0.043455	0.55743	1.07634	-0.477519	0.6928	0.9998
map01052	Type I polyketide structures	127	34	2	0.962068	1.48723	1.05279	-0.498831	0.7028	0.9998
map00500	Starch and sucrose metabolism	106	77	5	1.69268	2.23563	1.06548	-0.509585	0.701	0.9998
map00750	Vitamin B6 metabolism	24	13	2	0.335223	0.903085	1.09803	-0.517165	0.6976	0.9998
map05020	Prion disease	209	4	0	-0.0698461	0.505604	1.08347	-0.531116	0.7024	0.9998
map00552	Teichoic acid biosynthesis	41	10	0	0.24582	0.818315	1.06266	-0.538737	0.7102	0.9998
map00220	Arginine biosynthesis	60	36	1	0.956277	1.54125	1.07685	-0.543221	0.7126	0.9998
map04932	Non-alcoholic fatty liver disease	127	4	0	-0.0698461	0.505379	1.05688	-0.544268	0.7134	0.9998
map00564	Glycerophospholipid metabolism	115	44	6	1.06831	1.65161	1.07037	-0.544949	0.708	0.9998
map00625	Chloroalkane and chloroalkene degradation	43	13	1	0.28978	0.926077	1.06524	-0.597327	0.723	0.9998
map00230	Purine metabolism	220	111	10	2.00267	2.67472	1.0416	-0.645204	0.7496	0.9998
map00330	Arginine and proline metabolism	107	57	7	1.19516	1.9489	1.07406	-0.701767	0.7598	0.9998
map04922	Glucagon signaling pathway	57	10	1	0.0592803	0.816593	1.07556	-0.704111	0.7632	0.9998
map00380	Tryptophan metabolism	80	23	1	0.44686	1.21972	1.07834	-0.716708	0.7654	0.9998
map00740	Riboflavin metabolism	54	32	5	0.66187	1.44277	1.08054	-0.722696	0.7652	0.9998
map04260	Cardiac muscle contraction	67	3	0	-0.342582	0.449954	1.06899	-0.741387	0.7798	0.9998
map03440	Homologous recombination	72	30	1	0.589143	1.38112	1.06072	-0.74664	0.7688	0.9998
map00400	Phenylalanine, tyrosine and tryptophan biosynthesis	74	47	4	0.9549	1.75131	1.06211	-0.749835	0.7782	0.9998
map00906	Carotenoid biosynthesis	56	13	0	0.0715339	0.905648	1.08409	-0.769412	0.785	0.9998
map00730	Thiamine metabolism	36	25	1	0.442731	1.26911	1.06101	-0.778858	0.7806	0.9998
map04112	Cell cycle - Caulobacter	31	17	1	0.147444	1.03699	1.08657	-0.81867	0.7998	0.9998
map01055	Biosynthesis of vancomycin group antibiotics	29	11	0	-0.0487797	0.838236	1.07828	-0.822619	0.7982	0.9998
map00620	Pyruvate metabolism	133	94	11	1.59232	2.46788	1.06185	-0.824559	0.7944	0.9998
map00480	Glutathione metabolism	57	22	0	0.325103	1.2163	1.07085	-0.832234	0.7956	0.9998
map00785	Lipoic acid metabolism	31	20	0	0.247816	1.14205	1.06816	-0.837169	0.801	0.9998
map00984	Steroid degradation	15	8	0	-0.21009	0.69514	1.07971	-0.838403	0.8052	0.9998
map00600	Sphingolipid metabolism	51	13	0	0.0206676	0.917274	1.06229	-0.844033	0.8042	0.9998
map00450	Selenocompound metabolism	33	23	2	0.285734	1.23208	1.07029	-0.884199	0.817	0.9998
map00333	Prodigiosin biosynthesis	20	7	0	-0.261915	0.707889	1.07834	-0.899349	0.8198	0.9998
map00250	Alanine, aspartate and glutamate metabolism	70	43	3	0.698081	1.6655	1.07266	-0.901891	0.821	0.9998
map00270	Cysteine and methionine metabolism	125	70	6	1.15249	2.12642	1.04729	-0.929953	0.8212	0.9998
map04142	Lysosome	108	14	1	-0.0574405	0.946077	1.06208	-0.944862	0.83	0.9998
map00561	Glycerolipid metabolism	91	31	1	0.373667	1.41288	1.07603	-0.965784	0.8342	0.9998
map01040	Biosynthesis of unsaturated fatty acids	32	3	0	-0.611049	0.443771	1.07247	-0.983543	0.8406	0.9998
map00311	Penicillin and cephalosporin biosynthesis	16	6	0	-0.48326	0.673216	1.06828	-1.08256	0.8638	0.9998
map00460	Cyanoamino acid metabolism	36	11	0	-0.374	0.842585	1.07654	-1.13008	0.8796	0.9998
map00261	Monobactam biosynthesis	28	14	0	-0.360299	0.902331	1.07039	-1.1796	0.8786	0.9998
map00401	Novobiocin biosynthesis	30	10	1	-0.483176	0.828965	1.08157	-1.21318	0.8898	0.9998
map01501	beta-Lactam resistance	112	53	2	0.559253	1.86324	1.07286	-1.21543	0.8914	0.9998
map00940	Phenylpropanoid biosynthesis	32	3	0	-0.898919	0.437736	1.08146	-1.23597	0.8994	0.9998
map00660	C5-Branched dibasic acid metabolism	29	19	0	-0.199236	1.12692	1.07254	-1.23646	0.8972	0.9998
map00020	Citrate cycle (TCA cycle)	67	45	6	0.41822	1.71125	1.04369	-1.2389	0.8886	0.9998
map00521	Streptomycin biosynthesis	21	13	0	-0.444755	0.898008	1.06453	-1.26137	0.8934	0.9998
map00195	Photosynthesis	63	10	1	-0.530132	0.823961	1.071	-1.26433	0.901	0.9998
map00190	Oxidative phosphorylation	223	72	2	0.815032	2.16466	1.05855	-1.27497	0.8988	0.9998
map00630	Glyoxylate and dicarboxylate metabolism	104	69	5	0.753899	2.12264	1.06544	-1.28468	0.9018	0.9998
map05230	Central carbon metabolism in cancer	49	10	0	-0.558307	0.816627	1.06872	-1.28652	0.9072	0.9998
map01054	Nonribosomal peptide structures	51	26	1	-0.0827856	1.29349	1.06783	-1.28886	0.8976	0.9998
map05014	Amyotrophic lateral sclerosis	280	6	0	-0.79147	0.616084	1.08116	-1.3019	0.9058	0.9998
map00121	Secondary bile acid biosynthesis	15	6	0	-0.765083	0.637129	1.07504	-1.30433	0.9024	0.9998
map00541	O-Antigen nucleotide sugar biosynthesis	99	55	3	0.477119	1.8904	1.07903	-1.30978	0.9052	0.9998
map01220	Degradation of aromatic compounds	215	65	4	0.675149	2.06544	1.05518	-1.31758	0.9048	0.9998
map00361	Chlorocyclohexane and chlorobenzene degradation	41	12	0	-0.567225	0.86835	1.07327	-1.33758	0.9074	0.9998
map05111	Biofilm formation - Vibrio cholerae	106	57	1	0.435875	1.93742	1.05651	-1.42123	0.9208	0.9998
map00623	Toluene degradation	46	7	0	-0.872225	0.667389	1.06885	-1.44044	0.9276	0.9998
map05231	Choline metabolism in cancer	61	3	0	-1.12034	0.442835	1.08433	-1.4416	0.9254	0.9998
map00643	Styrene degradation	25	12	0	-0.680815	0.912586	1.0843	-1.46952	0.9318	0.9998
map00520	Amino sugar and nucleotide sugar metabolism	156	116	4	1.00923	2.73597	1.06726	-1.61793	0.9458	0.9998
map01212	Fatty acid metabolism	84	29	4	-0.486256	1.37261	1.07995	-1.72124	0.956	0.9998
map00531	Glycosaminoglycan degradation	15	7	0	-1.24566	0.67962	1.09721	-1.75471	0.9622	0.9998
map00260	Glycine, serine and threonine metabolism	109	64	2	0.14151	2.02282	1.07124	-1.75619	0.9562	0.9998
map00525	Acarbose and validamycin biosynthesis	27	5	0	-1.32511	0.565579	1.06022	-1.7833	0.9638	0.9998
map00780	Biotin metabolism	24	17	1	-0.919745	1.00438	1.07819	-1.78458	0.9584	0.9998
map00960	Tropane, piperidine and pyridine alkaloid biosynthesis	33	8	1	-1.18989	0.734907	1.06414	-1.80879	0.9636	0.9998
map02024	Quorum sensing	283	148	9	1.17494	3.07889	1.04828	-1.81625	0.9634	0.9998
map00523	Polyketide sugar unit biosynthesis	59	25	3	-0.683236	1.25718	1.06054	-1.82965	0.9646	0.9998
map00950	Isoquinoline alkaloid biosynthesis	63	8	1	-1.22745	0.695582	1.05065	-1.83033	0.9676	0.9998
map05200	Pathways in cancer	417	6	0	-1.37952	0.613533	1.05813	-1.88356	0.9692	0.9998
map00061	Fatty acid biosynthesis	39	20	3	-0.943071	1.14543	1.07036	-1.9512	0.9734	0.9998
map05208	Chemical carcinogenesis - reactive oxygen species	175	8	0	-1.47852	0.706539	1.07102	-2.04017	0.9754	0.9998
map04212	Longevity regulating pathway - worm	57	5	0	-1.63569	0.557787	1.05776	-2.0737	0.9804	0.9998
map03070	Bacterial secretion system	74	66	4	-0.209787	2.06863	1.077	-2.11552	0.9848	0.9998
map00720	Carbon fixation pathways in prokaryotes	117	76	10	-0.242977	2.21087	1.06436	-2.30547	0.9882	0.9998
map01250	Biosynthesis of nucleotide sugars	211	122	7	0.270149	2.78888	1.05397	-2.38976	0.991	0.9998
map00550	Peptidoglycan biosynthesis	53	51	3	-0.778145	1.82438	1.08047	-2.4087	0.9894	0.9998
map00360	Phenylalanine metabolism	74	46	1	-1.16928	1.73559	1.07509	-2.70198	0.9954	0.9998
map01502	Vancomycin resistance	22	21	0	-1.75839	1.16353	1.06334	-2.74787	0.9956	0.9998
map04724	Glutamatergic synapse	89	3	0	-2.62036	0.465294	1.07887	-2.86008	0.9954	0.9998
map00565	Ether lipid metabolism	31	5	0	-2.53828	0.568263	1.0679	-2.90901	0.9964	0.9998
map02010	ABC transporters	515	382	14	1.6008	4.94923	1.00855	-3.32005	0.9998	0.9998
map02020	Two-component system	499	392	19	1.00279	5.04567	1.00612	-4.01827	0.9998	0.9998
map00062	Fatty acid elongation	24	1	0	NA	NA	NA	NA	NA	NA
map00073	Cutin, suberine and wax biosynthesis	14	0	0	NA	NA	NA	NA	NA	NA
map00100	Steroid biosynthesis	34	2	0	NA	NA	NA	NA	NA	NA
map00120	Primary bile acid biosynthesis	18	1	0	NA	NA	NA	NA	NA	NA
map00140	Steroid hormone biosynthesis	47	1	0	NA	NA	NA	NA	NA	NA
map00196	Photosynthesis - antenna proteins	42	0	0	NA	NA	NA	NA	NA	NA
map00232	Caffeine metabolism	16	2	0	NA	NA	NA	NA	NA	NA
map00254	Aflatoxin biosynthesis	20	0	0	NA	NA	NA	NA	NA	NA
map00331	Clavulanic acid biosynthesis	5	1	0	NA	NA	NA	NA	NA	NA
map00363	Bisphenol degradation	2	0	0	NA	NA	NA	NA	NA	NA
map00402	Benzoxazinoid biosynthesis	8	0	0	NA	NA	NA	NA	NA	NA
map00403	Indole diterpene alkaloid biosynthesis	13	0	0	NA	NA	NA	NA	NA	NA
map00404	Staurosporine biosynthesis	40	0	0	NA	NA	NA	NA	NA	NA
map00512	Mucin type O-glycan biosynthesis	15	0	0	NA	NA	NA	NA	NA	NA
map00514	Other types of O-glycan biosynthesis	31	0	0	NA	NA	NA	NA	NA	NA
map00515	Mannose type O-glycan biosynthesis	21	0	0	NA	NA	NA	NA	NA	NA
map00532	Glycosaminoglycan biosynthesis - chondroitin sulfate / dermatan sulfate	18	1	0	NA	NA	NA	NA	NA	NA
map00533	Glycosaminoglycan biosynthesis - keratan sulfate	14	0	0	NA	NA	NA	NA	NA	NA
map00534	Glycosaminoglycan biosynthesis - heparan sulfate / heparin	22	0	0	NA	NA	NA	NA	NA	NA
map00542	O-Antigen repeat unit biosynthesis	35	1	0	NA	NA	NA	NA	NA	NA
map00563	Glycosylphosphatidylinositol (GPI)-anchor biosynthesis	27	1	0	NA	NA	NA	NA	NA	NA
map00590	Arachidonic acid metabolism	51	1	0	NA	NA	NA	NA	NA	NA
map00591	Linoleic acid metabolism	25	1	0	NA	NA	NA	NA	NA	NA
map00592	alpha-Linolenic acid metabolism	26	2	0	NA	NA	NA	NA	NA	NA
map00601	Glycosphingolipid biosynthesis - lacto and neolacto series	28	1	0	NA	NA	NA	NA	NA	NA
map00604	Glycosphingolipid biosynthesis - ganglio series	14	1	0	NA	NA	NA	NA	NA	NA
map00901	Indole alkaloid biosynthesis	31	1	0	NA	NA	NA	NA	NA	NA
map00902	Monoterpenoid biosynthesis	42	0	0	NA	NA	NA	NA	NA	NA
map00904	Diterpenoid biosynthesis	68	0	0	NA	NA	NA	NA	NA	NA
map00905	Brassinosteroid biosynthesis	12	0	0	NA	NA	NA	NA	NA	NA
map00908	Zeatin biosynthesis	10	1	0	NA	NA	NA	NA	NA	NA
map00909	Sesquiterpenoid and triterpenoid biosynthesis	75	2	0	NA	NA	NA	NA	NA	NA
map00941	Flavonoid biosynthesis	27	1	0	NA	NA	NA	NA	NA	NA
map00942	Anthocyanin biosynthesis	16	0	0	NA	NA	NA	NA	NA	NA
map00943	Isoflavonoid biosynthesis	18	0	0	NA	NA	NA	NA	NA	NA
map00944	Flavone and flavonol biosynthesis	15	1	0	NA	NA	NA	NA	NA	NA
map00945	Stilbenoid, diarylheptanoid and gingerol biosynthesis	12	1	0	NA	NA	NA	NA	NA	NA
map00946	Degradation of flavonoids	21	2	0	NA	NA	NA	NA	NA	NA
map00965	Betalain biosynthesis	8	1	0	NA	NA	NA	NA	NA	NA
map00966	Glucosinolate biosynthesis	21	2	0	NA	NA	NA	NA	NA	NA
map00981	Insect hormone biosynthesis	18	1	0	NA	NA	NA	NA	NA	NA
map00996	Biosynthesis of various alkaloids	14	0	0	NA	NA	NA	NA	NA	NA
map01056	Biosynthesis of type II polyketide backbone	9	1	0	NA	NA	NA	NA	NA	NA
map01100	Metabolic pathways	4727	2019	223	NA	NA	NA	NA	NA	NA
map01110	Biosynthesis of secondary metabolites	2116	689	77	NA	NA	NA	NA	NA	NA
map01120	Microbial metabolism in diverse environments	1281	680	107	NA	NA	NA	NA	NA	NA
map01521	EGFR tyrosine kinase inhibitor resistance	67	1	1	NA	NA	NA	NA	NA	NA
map01522	Endocrine resistance	77	0	0	NA	NA	NA	NA	NA	NA
map01524	Platinum drug resistance	46	2	0	NA	NA	NA	NA	NA	NA
map03008	Ribosome biogenesis in eukaryotes	83	1	1	NA	NA	NA	NA	NA	NA
map03013	Nucleocytoplasmic transport	98	0	0	NA	NA	NA	NA	NA	NA
map03015	mRNA surveillance pathway	63	2	2	NA	NA	NA	NA	NA	NA
map03040	Spliceosome	123	0	0	NA	NA	NA	NA	NA	NA
map03082	ATP-dependent chromatin remodeling	84	0	0	NA	NA	NA	NA	NA	NA
map03083	Polycomb repressive complex	65	0	0	NA	NA	NA	NA	NA	NA
map03230	Viral genome structure	119	0	0	NA	NA	NA	NA	NA	NA
map03240	Viral replication	130	0	0	NA	NA	NA	NA	NA	NA
map03250	Viral life cycle - HIV-1	60	1	0	NA	NA	NA	NA	NA	NA
map03260	Virion - Human immunodeficiency virus	20	0	0	NA	NA	NA	NA	NA	NA
map03261	Virion - Influenza A virus	12	0	0	NA	NA	NA	NA	NA	NA
map03262	Virion - Coronavirus	28	0	0	NA	NA	NA	NA	NA	NA
map03263	Virion - Enterovirus	13	0	0	NA	NA	NA	NA	NA	NA
map03264	Virion - Flavivirus	14	0	0	NA	NA	NA	NA	NA	NA
map03265	Virion - Lyssavirus	8	0	0	NA	NA	NA	NA	NA	NA
map03266	Virion - Herpesvirus	32	0	0	NA	NA	NA	NA	NA	NA
map03267	Virion - Adenovirus	19	0	0	NA	NA	NA	NA	NA	NA
map03268	Virion - Orthopoxvirus	46	0	0	NA	NA	NA	NA	NA	NA
map03460	Fanconi anemia pathway	54	1	0	NA	NA	NA	NA	NA	NA
map04010	MAPK signaling pathway	243	0	0	NA	NA	NA	NA	NA	NA
map04011	MAPK signaling pathway - yeast	91	1	0	NA	NA	NA	NA	NA	NA
map04012	ErbB signaling pathway	69	0	0	NA	NA	NA	NA	NA	NA
map04013	MAPK signaling pathway - fly	84	0	0	NA	NA	NA	NA	NA	NA
map04014	Ras signaling pathway	182	1	0	NA	NA	NA	NA	NA	NA
map04015	Rap1 signaling pathway	162	0	0	NA	NA	NA	NA	NA	NA
map04016	MAPK signaling pathway - plant	54	2	0	NA	NA	NA	NA	NA	NA
map04020	Calcium signaling pathway	198	0	0	NA	NA	NA	NA	NA	NA
map04022	cGMP-PKG signaling pathway	121	0	0	NA	NA	NA	NA	NA	NA
map04024	cAMP signaling pathway	172	1	0	NA	NA	NA	NA	NA	NA
map04060	Cytokine-cytokine receptor interaction	274	0	0	NA	NA	NA	NA	NA	NA
map04061	Viral protein interaction with cytokine and cytokine receptor	120	0	0	NA	NA	NA	NA	NA	NA
map04062	Chemokine signaling pathway	162	0	0	NA	NA	NA	NA	NA	NA
map04064	NF-kappa B signaling pathway	97	0	0	NA	NA	NA	NA	NA	NA
map04068	FoxO signaling pathway	102	2	0	NA	NA	NA	NA	NA	NA
map04071	Sphingolipid signaling pathway	83	2	0	NA	NA	NA	NA	NA	NA
map04072	Phospholipase D signaling pathway	108	2	0	NA	NA	NA	NA	NA	NA
map04075	Plant hormone signal transduction	45	0	0	NA	NA	NA	NA	NA	NA
map04080	Neuroactive ligand-receptor interaction	332	0	0	NA	NA	NA	NA	NA	NA
map04110	Cell cycle	133	1	1	NA	NA	NA	NA	NA	NA
map04111	Cell cycle - yeast	126	0	0	NA	NA	NA	NA	NA	NA
map04113	Meiosis - yeast	103	1	1	NA	NA	NA	NA	NA	NA
map04114	Oocyte meiosis	80	0	0	NA	NA	NA	NA	NA	NA
map04115	p53 signaling pathway	68	1	0	NA	NA	NA	NA	NA	NA
map04120	Ubiquitin mediated proteolysis	133	2	2	NA	NA	NA	NA	NA	NA
map04130	SNARE interactions in vesicular transport	35	0	0	NA	NA	NA	NA	NA	NA
map04136	Autophagy - other	23	0	0	NA	NA	NA	NA	NA	NA
map04137	Mitophagy - animal	61	2	2	NA	NA	NA	NA	NA	NA
map04138	Autophagy - yeast	82	0	0	NA	NA	NA	NA	NA	NA
map04139	Mitophagy - yeast	34	0	0	NA	NA	NA	NA	NA	NA
map04140	Autophagy - animal	110	0	0	NA	NA	NA	NA	NA	NA
map04144	Endocytosis	169	1	0	NA	NA	NA	NA	NA	NA
map04145	Phagosome	95	1	1	NA	NA	NA	NA	NA	NA
map04150	mTOR signaling pathway	117	1	1	NA	NA	NA	NA	NA	NA
map04210	Apoptosis	110	2	0	NA	NA	NA	NA	NA	NA
map04211	Longevity regulating pathway	68	1	0	NA	NA	NA	NA	NA	NA
map04213	Longevity regulating pathway - multiple species	58	2	1	NA	NA	NA	NA	NA	NA
map04214	Apoptosis - fly	56	1	0	NA	NA	NA	NA	NA	NA
map04215	Apoptosis - multiple species	40	1	0	NA	NA	NA	NA	NA	NA
map04216	Ferroptosis	33	2	2	NA	NA	NA	NA	NA	NA
map04218	Cellular senescence	117	0	0	NA	NA	NA	NA	NA	NA
map04261	Adrenergic signaling in cardiomyocytes	99	0	0	NA	NA	NA	NA	NA	NA
map04270	Vascular smooth muscle contraction	96	0	0	NA	NA	NA	NA	NA	NA
map04310	Wnt signaling pathway	123	0	0	NA	NA	NA	NA	NA	NA
map04320	Dorso-ventral axis formation	28	0	0	NA	NA	NA	NA	NA	NA
map04330	Notch signaling pathway	36	0	0	NA	NA	NA	NA	NA	NA
map04340	Hedgehog signaling pathway	45	0	0	NA	NA	NA	NA	NA	NA
map04341	Hedgehog signaling pathway - fly	26	0	0	NA	NA	NA	NA	NA	NA
map04350	TGF-beta signaling pathway	96	0	0	NA	NA	NA	NA	NA	NA
map04360	Axon guidance	128	0	0	NA	NA	NA	NA	NA	NA
map04361	Axon regeneration	59	2	0	NA	NA	NA	NA	NA	NA
map04370	VEGF signaling pathway	39	0	0	NA	NA	NA	NA	NA	NA
map04371	Apelin signaling pathway	105	1	1	NA	NA	NA	NA	NA	NA
map04380	Osteoclast differentiation	99	1	1	NA	NA	NA	NA	NA	NA
map04390	Hippo signaling pathway	115	0	0	NA	NA	NA	NA	NA	NA
map04391	Hippo signaling pathway - fly	53	0	0	NA	NA	NA	NA	NA	NA
map04392	Hippo signaling pathway - multiple species	25	0	0	NA	NA	NA	NA	NA	NA
map04510	Focal adhesion	151	0	0	NA	NA	NA	NA	NA	NA
map04512	ECM-receptor interaction	66	0	0	NA	NA	NA	NA	NA	NA
map04514	Cell adhesion molecules	109	0	0	NA	NA	NA	NA	NA	NA
map04520	Adherens junction	83	0	0	NA	NA	NA	NA	NA	NA
map04530	Tight junction	106	1	1	NA	NA	NA	NA	NA	NA
map04540	Gap junction	60	0	0	NA	NA	NA	NA	NA	NA
map04550	Signaling pathways regulating pluripotency of stem cells	114	0	0	NA	NA	NA	NA	NA	NA
map04610	Complement and coagulation cascades	82	0	0	NA	NA	NA	NA	NA	NA
map04611	Platelet activation	90	0	0	NA	NA	NA	NA	NA	NA
map04612	Antigen processing and presentation	47	1	0	NA	NA	NA	NA	NA	NA
map04613	Neutrophil extracellular trap formation	90	0	0	NA	NA	NA	NA	NA	NA
map04614	Renin-angiotensin system	22	0	0	NA	NA	NA	NA	NA	NA
map04620	Toll-like receptor signaling pathway	76	0	0	NA	NA	NA	NA	NA	NA
map04622	RIG-I-like receptor signaling pathway	54	1	0	NA	NA	NA	NA	NA	NA
map04623	Cytosolic DNA-sensing pathway	62	0	0	NA	NA	NA	NA	NA	NA
map04624	Toll and Imd signaling pathway	57	0	0	NA	NA	NA	NA	NA	NA
map04625	C-type lectin receptor signaling pathway	82	0	0	NA	NA	NA	NA	NA	NA
map04630	JAK-STAT signaling pathway	143	0	0	NA	NA	NA	NA	NA	NA
map04640	Hematopoietic cell lineage	80	0	0	NA	NA	NA	NA	NA	NA
map04650	Natural killer cell mediated cytotoxicity	94	0	0	NA	NA	NA	NA	NA	NA
map04657	IL-17 signaling pathway	80	1	0	NA	NA	NA	NA	NA	NA
map04658	Th1 and Th2 cell differentiation	67	0	0	NA	NA	NA	NA	NA	NA
map04659	Th17 cell differentiation	87	1	0	NA	NA	NA	NA	NA	NA
map04660	T cell receptor signaling pathway	92	0	0	NA	NA	NA	NA	NA	NA
map04662	B cell receptor signaling pathway	60	0	0	NA	NA	NA	NA	NA	NA
map04664	Fc epsilon RI signaling pathway	47	0	0	NA	NA	NA	NA	NA	NA
map04666	Fc gamma R-mediated phagocytosis	64	1	0	NA	NA	NA	NA	NA	NA
map04668	TNF signaling pathway	94	0	0	NA	NA	NA	NA	NA	NA
map04670	Leukocyte transendothelial migration	75	0	0	NA	NA	NA	NA	NA	NA
map04672	Intestinal immune network for IgA production	37	0	0	NA	NA	NA	NA	NA	NA
map04710	Circadian rhythm	28	0	0	NA	NA	NA	NA	NA	NA
map04711	Circadian rhythm - fly	11	0	0	NA	NA	NA	NA	NA	NA
map04712	Circadian rhythm - plant	28	0	0	NA	NA	NA	NA	NA	NA
map04713	Circadian entrainment	79	0	0	NA	NA	NA	NA	NA	NA
map04720	Long-term potentiation	43	0	0	NA	NA	NA	NA	NA	NA
map04721	Synaptic vesicle cycle	55	0	0	NA	NA	NA	NA	NA	NA
map04722	Neurotrophin signaling pathway	90	0	0	NA	NA	NA	NA	NA	NA
map04723	Retrograde endocannabinoid signaling	119	0	0	NA	NA	NA	NA	NA	NA
map04725	Cholinergic synapse	90	0	0	NA	NA	NA	NA	NA	NA
map04726	Serotonergic synapse	85	2	0	NA	NA	NA	NA	NA	NA
map04728	Dopaminergic synapse	84	2	0	NA	NA	NA	NA	NA	NA
map04730	Long-term depression	45	0	0	NA	NA	NA	NA	NA	NA
map04740	Olfactory transduction	25	0	0	NA	NA	NA	NA	NA	NA
map04742	Taste transduction	41	0	0	NA	NA	NA	NA	NA	NA
map04744	Phototransduction	18	0	0	NA	NA	NA	NA	NA	NA
map04745	Phototransduction - fly	18	0	0	NA	NA	NA	NA	NA	NA
map04750	Inflammatory mediator regulation of TRP channels	68	0	0	NA	NA	NA	NA	NA	NA
map04810	Regulation of actin cytoskeleton	172	0	0	NA	NA	NA	NA	NA	NA
map04814	Motor proteins	113	0	0	NA	NA	NA	NA	NA	NA
map04911	Insulin secretion	68	0	0	NA	NA	NA	NA	NA	NA
map04912	GnRH signaling pathway	64	1	0	NA	NA	NA	NA	NA	NA
map04913	Ovarian steroidogenesis	40	0	0	NA	NA	NA	NA	NA	NA
map04914	Progesterone-mediated oocyte maturation	65	1	0	NA	NA	NA	NA	NA	NA
map04915	Estrogen signaling pathway	77	1	0	NA	NA	NA	NA	NA	NA
map04916	Melanogenesis	67	1	0	NA	NA	NA	NA	NA	NA
map04917	Prolactin signaling pathway	57	1	0	NA	NA	NA	NA	NA	NA
map04918	Thyroid hormone synthesis	53	2	0	NA	NA	NA	NA	NA	NA
map04919	Thyroid hormone signaling pathway	91	2	0	NA	NA	NA	NA	NA	NA
map04920	Adipocytokine signaling pathway	53	2	1	NA	NA	NA	NA	NA	NA
map04921	Oxytocin signaling pathway	112	0	0	NA	NA	NA	NA	NA	NA
map04923	Regulation of lipolysis in adipocytes	47	0	0	NA	NA	NA	NA	NA	NA
map04924	Renin secretion	50	0	0	NA	NA	NA	NA	NA	NA
map04925	Aldosterone synthesis and secretion	65	0	0	NA	NA	NA	NA	NA	NA
map04926	Relaxin signaling pathway	96	0	0	NA	NA	NA	NA	NA	NA
map04927	Cortisol synthesis and secretion	54	0	0	NA	NA	NA	NA	NA	NA
map04928	Parathyroid hormone synthesis, secretion and action	85	1	0	NA	NA	NA	NA	NA	NA
map04929	GnRH secretion	51	0	0	NA	NA	NA	NA	NA	NA
map04930	Type II diabetes mellitus	37	2	0	NA	NA	NA	NA	NA	NA
map04933	AGE-RAGE signaling pathway in diabetic complications	76	0	0	NA	NA	NA	NA	NA	NA
map04934	Cushing syndrome	122	1	0	NA	NA	NA	NA	NA	NA
map04935	Growth hormone synthesis, secretion and action	92	0	0	NA	NA	NA	NA	NA	NA
map04940	Type I diabetes mellitus	25	2	1	NA	NA	NA	NA	NA	NA
map04950	Maturity onset diabetes of the young	26	0	0	NA	NA	NA	NA	NA	NA
map04960	Aldosterone-regulated sodium reabsorption	26	0	0	NA	NA	NA	NA	NA	NA
map04961	Endocrine and other factor-regulated calcium reabsorption	33	0	0	NA	NA	NA	NA	NA	NA
map04962	Vasopressin-regulated water reabsorption	33	0	0	NA	NA	NA	NA	NA	NA
map04966	Collecting duct acid secretion	17	0	0	NA	NA	NA	NA	NA	NA
map04970	Salivary secretion	64	1	0	NA	NA	NA	NA	NA	NA
map04971	Gastric acid secretion	50	0	0	NA	NA	NA	NA	NA	NA
map04972	Pancreatic secretion	69	1	0	NA	NA	NA	NA	NA	NA
map04973	Carbohydrate digestion and absorption	22	2	0	NA	NA	NA	NA	NA	NA
map04974	Protein digestion and absorption	66	0	0	NA	NA	NA	NA	NA	NA
map04975	Fat digestion and absorption	28	1	0	NA	NA	NA	NA	NA	NA
map04976	Bile secretion	62	1	1	NA	NA	NA	NA	NA	NA
map04977	Vitamin digestion and absorption	23	0	0	NA	NA	NA	NA	NA	NA
map04978	Mineral absorption	36	0	0	NA	NA	NA	NA	NA	NA
map04979	Cholesterol metabolism	50	0	0	NA	NA	NA	NA	NA	NA
map05030	Cocaine addiction	39	2	0	NA	NA	NA	NA	NA	NA
map05031	Amphetamine addiction	46	2	0	NA	NA	NA	NA	NA	NA
map05032	Morphine addiction	64	0	0	NA	NA	NA	NA	NA	NA
map05033	Nicotine addiction	27	0	0	NA	NA	NA	NA	NA	NA
map05034	Alcoholism	86	2	0	NA	NA	NA	NA	NA	NA
map05110	Vibrio cholerae infection	49	2	1	NA	NA	NA	NA	NA	NA
map05135	Yersinia infection	122	1	0	NA	NA	NA	NA	NA	NA
map05140	Leishmaniasis	59	0	0	NA	NA	NA	NA	NA	NA
map05142	Chagas disease	85	0	0	NA	NA	NA	NA	NA	NA
map05143	African trypanosomiasis	41	0	0	NA	NA	NA	NA	NA	NA
map05144	Malaria	67	0	0	NA	NA	NA	NA	NA	NA
map05145	Toxoplasmosis	95	1	0	NA	NA	NA	NA	NA	NA
map05146	Amoebiasis	87	2	0	NA	NA	NA	NA	NA	NA
map05160	Hepatitis C	112	1	0	NA	NA	NA	NA	NA	NA
map05161	Hepatitis B	132	2	1	NA	NA	NA	NA	NA	NA
map05162	Measles	117	1	0	NA	NA	NA	NA	NA	NA
map05163	Human cytomegalovirus infection	192	1	0	NA	NA	NA	NA	NA	NA
map05164	Influenza A	128	1	0	NA	NA	NA	NA	NA	NA
map05165	Human papillomavirus infection	231	2	1	NA	NA	NA	NA	NA	NA
map05166	Human T-cell leukemia virus 1 infection	191	1	1	NA	NA	NA	NA	NA	NA
map05168	Herpes simplex virus 1 infection	148	1	0	NA	NA	NA	NA	NA	NA
map05169	Epstein-Barr virus infection	172	2	0	NA	NA	NA	NA	NA	NA
map05170	Human immunodeficiency virus 1 infection	163	1	0	NA	NA	NA	NA	NA	NA
map05202	Transcriptional misregulation in cancer	162	0	0	NA	NA	NA	NA	NA	NA
map05204	Chemical carcinogenesis - DNA adducts	29	2	0	NA	NA	NA	NA	NA	NA
map05205	Proteoglycans in cancer	165	1	1	NA	NA	NA	NA	NA	NA
map05207	Chemical carcinogenesis - receptor activation	129	2	0	NA	NA	NA	NA	NA	NA
map05210	Colorectal cancer	72	1	0	NA	NA	NA	NA	NA	NA
map05211	Renal cell carcinoma	56	1	0	NA	NA	NA	NA	NA	NA
map05212	Pancreatic cancer	63	1	0	NA	NA	NA	NA	NA	NA
map05213	Endometrial cancer	45	0	0	NA	NA	NA	NA	NA	NA
map05214	Glioma	54	0	0	NA	NA	NA	NA	NA	NA
map05215	Prostate cancer	81	1	0	NA	NA	NA	NA	NA	NA
map05216	Thyroid cancer	34	0	0	NA	NA	NA	NA	NA	NA
map05217	Basal cell carcinoma	48	0	0	NA	NA	NA	NA	NA	NA
map05218	Melanoma	50	0	0	NA	NA	NA	NA	NA	NA
map05219	Bladder cancer	38	1	0	NA	NA	NA	NA	NA	NA
map05220	Chronic myeloid leukemia	63	0	0	NA	NA	NA	NA	NA	NA
map05221	Acute myeloid leukemia	57	0	0	NA	NA	NA	NA	NA	NA
map05222	Small cell lung cancer	74	1	0	NA	NA	NA	NA	NA	NA
map05223	Non-small cell lung cancer	60	0	0	NA	NA	NA	NA	NA	NA
map05224	Breast cancer	105	0	0	NA	NA	NA	NA	NA	NA
map05225	Hepatocellular carcinoma	116	2	0	NA	NA	NA	NA	NA	NA
map05226	Gastric cancer	108	0	0	NA	NA	NA	NA	NA	NA
map05235	PD-L1 expression and PD-1 checkpoint pathway in cancer	73	0	0	NA	NA	NA	NA	NA	NA
map05310	Asthma	20	0	0	NA	NA	NA	NA	NA	NA
map05320	Autoimmune thyroid disease	25	0	0	NA	NA	NA	NA	NA	NA
map05321	Inflammatory bowel disease	54	0	0	NA	NA	NA	NA	NA	NA
map05322	Systemic lupus erythematosus	45	0	0	NA	NA	NA	NA	NA	NA
map05323	Rheumatoid arthritis	67	1	1	NA	NA	NA	NA	NA	NA
map05330	Allograft rejection	22	0	0	NA	NA	NA	NA	NA	NA
map05332	Graft-versus-host disease	22	0	0	NA	NA	NA	NA	NA	NA
map05340	Primary immunodeficiency	37	2	0	NA	NA	NA	NA	NA	NA
map05410	Hypertrophic cardiomyopathy	79	0	0	NA	NA	NA	NA	NA	NA
map05412	Arrhythmogenic right ventricular cardiomyopathy	68	0	0	NA	NA	NA	NA	NA	NA
map05414	Dilated cardiomyopathy	87	0	0	NA	NA	NA	NA	NA	NA
map05416	Viral myocarditis	39	1	0	NA	NA	NA	NA	NA	NA

## Sheet: Table S8
Supplementary Table 8. The content of short-chain fatty acids (SCFAs) in cecum among SAE1000 group, CGA400 group and CON group
Item	CON_1	CON_2	CON_3	CON_4	CON_5	CON_6	CON_7	CON_8	SAE1000_1	SAE1000_2	SAE1000_3	SAE1000_4	SAE1000_5	SAE1000_6	SAE1000_7	SAE1000_8	CGA400_1	CGA400_2	CGA400_3	CGA400_4	CGA400_5	CGA400_6	CGA400_7	CGA400_8
Acetic acid	2.54429	2.77	2.45	2.67	1.9	3.65	2	2.37	2.56	2.48857	1.98	2.39	3.34	3.35	2.16	1.64	3.27	3.14	4.47	4.08	3.54714	2.46	4.63	2.78
Propionic acid	0.875714	0.998	0.922	1	0.618	1.22	0.701	0.671	1.05	0.857143	0.462	0.732	1.29	1.39	0.63	0.446	1.17	1.07	1.49	1.43	1.09857	0.58	1.07	0.88
Isobutyric acid	0.115786	0.163	0.0687	0.0592	0.132	0.185	0.0596	0.143	0.161	0.115257	0.106	0.0747	0.166	0.13	0.0966	0.0725	0.164	0.164	0.124	0.0671	0.120486	0.115	0.0813	0.128
Butyric acid	0.414429	0.355	0.493	0.561	0.251	0.588	0.383	0.27	0.363	0.356	0.227	0.267	0.577	0.564	0.281	0.213	0.582	0.474	0.838	0.852	0.610714	0.275	0.846	0.408
Isovaleric acid	0.0843714	0.0887	0.0589	0.0616	0.125	0.101	0.0514	0.104	0.121	0.106557	0.127	0.0851	0.123	0.107	0.103	0.0798	0.154	0.123	0.0966	0.0868	0.114729	0.117	0.0777	0.148
Valeric acid	0.104129	0.121	0.103	0.121	0.0501	0.197	0.0682	0.0686	0.145	0.108343	0.0664	0.0675	0.15	0.199	0.0762	0.0543	0.182	0.108	0.17	0.149	0.1351	0.0673	0.19	0.0794
Hexanoic acid	0.00282857	0.00322	0.0027	0.00315	0.00215	0.00505	0.00173	0.0018	0.00582	0.00403429	0.00296	0.00271	0.00562	0.00501	0.00306	0.00306	0.00496	0.00359	0.00455	0.00305	0.00393571	0.0034	0.00402	0.00398
Total SCFAs	4.14154	4.49892	4.0983	4.47595	3.07825	5.94605	3.26493	3.6284	4.40582	4.03591	2.97136	3.61901	5.65162	5.74501	3.34986	2.50866	5.52696	5.08259	7.19315	6.66795	5.63068	3.6177	6.89902	4.42738

## Sheet: Table S9
Supplementary Table 9. The content of caffeoylquinic acids (CQAs) metabolites in cecum among SAE1000 group, CGA400 group and CON group
Item	Neochlorogenic acid			Chlorogenic acid			Cryptochlorogenic acid			5-O-Feruloylquinic acid			Dihydrocaffeic acid			Vanillic acid			Caffeic Acid			3-hydroxybenzoic acid			Syringic acid			3-O-p-Coumaroylquinic acid			3-O-Feruloylquinic acid			p-Coumaric acid			3-(3-hydroxyl phenyl)propanol			Isoferulic acid			(E)-Ferulic acid			B Isochlorogenic acid B			A Isochlorogenic acid A
	RT	Area	Calc. Conc.	RT	Area	Calc. Conc.	RT	Area	Calc. Conc.	RT	Area	Calc. Conc.	RT	Area	Calc. Conc.	RT	Area	Calc. Conc.	RT	Area	Calc. Conc.	RT	Area	Calc. Conc.	RT	Area	Calc. Conc.	RT	Area	Calc. Conc.	RT	Area	Calc. Conc.	RT	Area	Calc. Conc.	RT	Area	Calc. Conc.	RT	Area	Calc. Conc.	RT	Area	Calc. Conc.	RT	Area	Calc. Conc.	RT
2.5ppb	4.89733	172.592	5.49787	6.09367	3602.77	1.13153	6.31142	399.854	6.08648	6.35227	273.447	17.1479	6.35643	61.0491	9.93696	6.74213	224.799	8.6675	6.84215	2444.96	1.84275	6.96965	214.559	7.61921	7.04937	290.576	6.56706	7.14898	556.273	9.96612	7.59085	418.198	11.1288	8.25743	725.152	1.81344	8.575	272.795	3.99241	8.82387	91.7339	7.9228	9.13345	426.529	6.83492	9.15457	575.612	7.60254	9.41378
5ppb	4.78857	190.849	5.74348	6.06022	5324.32	4.68894	6.27797	540.865	7.41716	6.31882	312.171	17.4349	6.33133	230.15	13.0077	6.71703	229.468	8.72778	6.81705	2234.12	1.41945	6.93618	222.526	7.73064	7.02427	253.551	6.19473	7.14897	612.052	10.2427	7.59085	478.25	11.4954	8.25743	939.689	2.5964	8.55825	367.628	4.81386	8.81548	173.437	9.29546	9.13343	542.697	7.5048	9.15455	724.359	9.07591	9.42213
10ppb	4.8304	574.128	10.8997	6.11042	7711.09	9.62094	6.3449	1049.18	12.214	6.38575	950.798	22.1692	6.415	385.53	15.8293	6.76723	593.435	13.427	6.88398	5210.91	7.39595	7.01148	515.183	11.824	7.0912	736.356	11.0498	7.20753	1675.69	15.517	7.65778	1316.29	16.6117	8.33275	2142.98	6.98787	8.64195	872.456	9.18673	8.8908	432.012	13.6397	9.20877	1339.57	12.1	9.22152	1053.43	12.3354	9.49745
50ppb	4.87225	3514.58	50.457	6.12717	29058.6	53.7334	6.35328	5396.16	53.2351	6.39413	4887.11	51.3496	6.42338	2106.19	47.0751	6.78398	3455.36	50.3779	6.884	25696.3	48.5245	7.01987	3062.65	47.4548	7.09958	4600.28	49.9055	7.20755	8947.47	51.5761	7.64943	7093.83	51.8843	8.33275	13234.2	47.4657	8.65032	5360.96	48.0666	8.8908	2549	49.2063	9.20877	7718.24	48.8827	9.22152	5264.05	54.0422	9.48908
100ppb	4.88897	7599.05	105.404	6.13553	54257.4	105.804	6.36163	10975.4	105.885	6.41087	11305	98.9266	6.44012	5047.94	100.495	6.79235	7663.79	104.714	6.90073	55625.2	108.613	7.0366	7210.8	105.474	7.11632	10209.1	106.307	7.21592	19402.3	103.419	7.66617	16237.5	107.707	8.34948	28950.2	104.822	8.65868	12183.7	107.166	8.90753	5933.35	106.066	9.2255	16691.6	100.628	9.23825	10994.8	110.806	9.50583
500ppb	4.87223	35238.8	477.237	6.12715	224336	457.255	6.36163	48321.7	458.31	6.4025	54883.3	421.979	6.43175	24707.1	457.491	6.78398	35333.3	461.96	6.89237	248025	494.895	7.02823	33458.9	472.6	7.10795	46602.4	472.279	7.21592	90177.8	454.378	7.6578	69568.3	433.298	8.34112	137886	502.387	8.65032	55558.6	482.883	8.89917	26918.5	458.629	9.21712	84292.3	490.448	9.22988	45183.8	449.453	9.49745
800ppb	4.88898	59402.4	802.305	6.12715	425656	873.26	6.35327	86809	821.503	6.40248	105650	798.316	6.43175	44237.8	812.153	6.78398	61966.4	805.824	6.89235	407862	815.799	7.02822	57425.3	807.812	7.09957	80180.8	809.944	7.20755	159988	800.553	7.64943	132097	815.042	8.33275	223451	814.662	8.64195	94158.3	817.238	8.89082	48039.3	813.47	9.2004	134832	781.886	9.22152	80700.8	801.254	9.4891
1,000ppb	4.87225	74764.7	1008.97	6.12717	468603	962.006	6.36165	106026	1002.85	6.4025	138276	1040.18	6.42338	55216.2	1011.51	6.78398	78074.7	1013.8	6.89237	494210	989.16	7.02823	71665.4	1006.99	7.10795	99602.9	1005.25	7.21592	204616	1021.85	7.6578	165723	1020.33	8.34112	270609	986.765	8.6503	114582	994.154	8.8908	59693.7	1009.27	9.20875	175989	1019.22	9.22987	103081	1022.93	9.4891
CON_1	4.89735	1252.21	20.0217	6.06858	2158.81	0	6.30307	85.2441	3.1176	6.37738	99.6806	15.8597	6.37318	865.611	24.5472	6.71703	786.26	15.9166	6.82542	4153.17	5.27233	6.94455	11401.1	164.083	7.04937	376.253	7.42863	7.1657	21.7731	7.31566	7.64105	72.3772	9.01752	8.24072	1333.69	4.03433	8.56665	17118.9	149.915	8.8155	484.536	14.5221	9.16693	196.504	5.50848	9.13785	148.852	3.37542	9.42215
CON_2	4.91407	626.413	11.603	6.06858	567.592	0	6.28632	57.7378	2.85803	6.31043	61.8067	15.5789	6.3648	674.284	21.0728	6.71703	2754.2	41.325	6.8254	4321.86	5.611	6.93617	48743.5		7.04937	564	9.31661	7.19082	13.5726	7.275	7.57412	43.167	8.83919	8.2407	1899.57	6.09954	8.56663	16191.3	141.88	8.81548	624.459	16.8729	9.15018	176.855	5.39517	9.12947	83.1137	2.72427	9.43052
CON_3	4.9057	854.295	14.6687	6.05183	838.075	0	6.3198	0		6.3188	131.328	16.0943	6.35643	1773.14	41.0272	6.7003	1545.86	25.724	6.81705	5413.37	7.80243	6.9278	13999.1	200.42	7.04937	563.211	9.30868	7.2159	3.25878	7.22385	7.69127	27.5726	8.74398	8.22397	487.08	0.944587	8.55827	21084.8	184.268	8.79875	421.628	13.4652	9.14182	145.171	5.21246	9.1964	22.7222	2.12609	9.43888
CON_4	4.89733	1070.38	17.5756	6.05185	1047.1	0	6.41183	0		6.34392	74.0225	15.6695	6.35643	1213.5	30.8646	6.7003	1261.91	22.0578	6.81705	8387.8	13.7742	6.92782	11961	171.914	7.04938	454.886	8.21936	7.21592	24.954	7.33143	7.57413	25.6744	8.7324	8.22397	1402.57	4.28571	8.55827	33264.3		8.79875	612.254	16.6679	9.15018	202.576	5.54349	9.10437	18.7033	2.08628	9.45562
CON_5	4.89735	1140.81	18.5231	6.04348	352.579	0	6.2947	26.5853	2.56405	6.4025	17.9914	15.2541	6.33972	724.159	21.9785	6.70032	517.151	12.4421	6.80033	4105.82	5.17727	6.91947	7238.22	105.858	7.01592	209.34	5.75015	7.19083	29.5877	7.35441	7.5825	42.6273	8.83589	8.22398	701.652	1.72767	8.54155	8643.62	76.5013	8.79878	396.358	13.0407	9.1251	112.148	5.02204	9.3052	4.72272	1.9478	9.4138
CON_6	4.93082	2045.26	30.6905	6.04348	699.805	0	6.2445	46.9095	2.75585	6.4025	15.8668	15.2384	6.35645	899.307	25.1591	6.7003	2463.74	37.5749	6.80868	11637.3		6.91945	22277.6	316.209	7.041	1532.99	19.0608	7.22428	10.927	7.26188	7.56577	16.1277	8.67411	8.22398	4963.65	17.282	8.55828	31475.3	274.272	8.79877	1734.53	35.5227	9.14183	260.244	5.87603	9.21315	37.3372	2.27085	9.40543
CON_7	4.93082	1540.6	23.9015	6.04348	685.949	0	6.27797	22.7477	2.52784	6.39412	28.1431	15.3294	6.33972	2038.93		6.69195	6745.66		6.80032	3978.97	4.92258	6.90272	8943.55	129.71	7.04938	2227.98		7.19082	1.97788	7.2175	7.62433	14.0159	8.66122	8.20725	1120.96	3.25795	8.54992	75016.3	65.4277	8.79877	916.31	21.7762	9.1502	179.882	5.41262	9.17132	19.8692	2.09783	9.40542
CON_8	4.9308	1920.53	29.0125	6.02675	256.403	0	6.2696	84.2708	3.10841	6.36067	56.9941	15.5433	6.35645	1113.6	29.0505	6.70032	484.032	12.0145	6.8087	5532.68	8.04198	6.91947	11250	161.969	7.05775	202.589	5.68227	7.2243	3.59438	7.22552	7.71638	7.3439	8.62049	8.22398	506.971	1.01718	8.5499	18855.4	164.956	8.79877	469.487	14.2693	9.15018	98.9218	4.94577	9.23825	5.51449	1.95564	9.46398
SAE1000_1	4.89737	1474.2	23.0082	6.03513	10586.8	15.5634	6.26962	2357.58		6.31047	33.5087	15.3692	6.33972	2208.49	48.9328	6.70032	1700.39	27.7191	6.80033	4317.2	5.60164	6.9111	24088.5	341.538	7.04102	411.644		7.2745	4.55527	7.23028	7.54067	25.4833	8.73123	8.20725	536.117	1.12355	8.54992	32407.8	282.349	8.79877	372.125	12.6335	9.15022	136.364	5.16168	9.22153	10.6156	2.00617	9.40543
SAE1000_2	4.9057	1489.4	23.2126	6.01	800.657	0	6.23613	118.455	3.431	6.34392	41.5509	15.4288	6.3146	916.491	25.4711	6.66683	3863.16	55.643	6.77522	2675.85		6.87762	5902.25	87.1716	7.0159	2029.5	24.0537	7.28285	7.16128	7.24321	7.66617	25.9105	8.73384	8.19887	609.169	1.39016	8.53317	36919.9	321.433	8.77365	736.446	18.7543	9.11672	165.801	5.33143	9.25498	3.8403	1.93906	9.38868
SAE1000_3	4.93918	2262.51	33.6131	6.02675	502.091	0	6.2696	74.2428	3.01378	6.37738	35.3404	15.3827	6.34808	587.161	19.4908	6.7003	532.632		6.80032	4458.71	5.88577	6.91945	2965.04		7.03263	421.145	7.88006	7.18245	3.24612	7.22379	7.69963	34.9415	8.78897	8.2156	828.667	2.19122	8.54153	4099.04	375.136	8.78202	234.33	10.3185	9.11672	74.942	4.80749	9.2466	4.3193	1.9438	9.41378
SAE1000_4	4.93082	1883.45	28.5137	6.05185	858.626	0	6.27795	155.83	3.78369	6.38575	32.3247	15.3604	6.3397	482.561		6.7003	6704.74	92.3312	6.80867	7412.39	11.8159	6.9278	49025.6	690.328	7.03263	1888.59	22.6367	7.17407	4.13648	7.22821	7.56575	15.4199	8.66979	8.23232	4865.18	16.9226	8.54988	12829.5	112.76	8.79875	1256.41	27.4901	9.13343	377.126	6.55003	9.22987	2.79733	1.92873	9.38867
SAE1000_5	4.93082	2441.12	36.016	6.04348	905.183	12.31	6.2696	472.155	6.76876	6.28535	37.4299	15.3982	6.34808	1007.93	27.1316	6.69195	2325.31	35.7876	6.80868	6149.14	9.27965	6.91945	38503.5	543.158	7.03265	775.239	11.4408	7.23265	17.5268	7.29461	7.51555	13.8278	8.66007	8.21562	917.408	2.51509	8.54992	21268.9	185.863	8.79877	545.464	15.5457	9.13347	272.02	5.94394	9.24662	1.12398	1.91215	9.38868
SAE1000_6	4.79693	1674.13	25.6977	6.04348	2258.79	0	6.26123	312.07	5.25808	6.35228	43.6598	15.4444	6.33972	2815.6	59.9575	6.7003	7403.19	101.349	6.80032	20226.2	37.5422	6.92782	38696	545.85	7.02427	4056.66	44.4389	7.14898	13.3742	7.27401	7.66617	23.9968	8.72215	8.23233	3388.77	11.5344	8.54153	26922	234.83	8.79038	1206.59	26.653	9.12508	206.061	5.56358	9.21313	0		9.38867
SAE1000_7	4.91407	2644.16	38.7474	6.03512	1015.72	0	6.2696	190.174	4.10779	6.34392	36.0247	15.3878	6.33135	1846.65	42.362	6.69195	1042.41	19.2239	6.80032	8443.21	13.8854	6.91945	24250.9	343.809	7.02427	464.006	8.31107	7.18245	2.79435	7.22155	7.56577	33.5306	8.78036	8.2156	725.307	1.81401	8.54153	11413.4		8.79038	413.934	13.336	9.12508	189.904	5.47042	9.25498	0		9.38867
SAE1000_8	4.97265	2670.41	39.1005	6.08532	692.809	11.1471	6.31143	183.169	4.04169	6.41922	23.2153	15.2928	6.3899	654.787	20.7188	6.74213	3261.42	47.8739	6.85052	11648.3	20.3204	6.97802	10035.1	144.976	7.07447	2190.42	25.6719	7.27447	13.9567	7.2769	7.64105	26.4385	8.73706	8.2909	2808.3	9.41598	8.6001	14345.3	125.889	8.84058	1505.21	31.67	9.18365	242.589	5.77423	9.20477	4.04745	1.94111	9.43052
CGA400_1	4.8304	1053.37	17.3469	6.05185	6556.8	7.23572	6.27797	162.992	3.85128	6.33555	22.7126	15.2891	6.33135	545.328		6.69193	2959.31	43.9733	6.80032	13689.5	24.4184	6.91945	11836.5	170.173	7.02427	2639.5	30.1879	7.29122	9.44922	7.25455	7.55738	15.9052	8.67275	8.22397	4565.02	15.8272	8.53317	13349.7	117.266	8.78202	1086.63	24.6376	9.11672	330.881	6.28336	9.18805	30.4357	2.20249	9.47235
CGA400_2	4.93918	1099.09	17.9619	6.04348	19175.9	33.3117	6.26125	339.32	5.51524	6.31047	30.6954	15.3483	6.34808	1521.38	36.4555	6.69195	5454.18	76.185	6.80033	8606.08	14.2124	6.9111	21812.3	309.701	7.04938	2519.16	28.9777	7.29123	7.11662	7.24298	7.56577	46.6682	8.86056	8.21562	2051	6.65218	8.54992	157527	1366.14	8.7904	771.927	19.3505	9.14183	248.843	5.81029	9.14622	19.0247	2.08946	9.43053
CGA400_3	4.74673	1664.85	25.5729	6.03512	98597.7	197.429	6.26123	1236.66	13.9831	6.34393	78.2992	15.7012	6.33972	1784.3	41.2299	6.69195	11746.3	157.423	6.80032	12874.6	22.7824	6.89435	10634.6		7.04938	3200.53	35.8296	7.16572	2.55529	7.22037	7.54903	31.1897	8.76607	8.21562	3029.9	10.2247	8.54155	83037.9	720.912	8.7904	13402.3		9.13347	1163.84	11.0866	9.12948	30.9892	2.20797	9.39705
CGA400_4	4.90572	1442.97	22.588	6.03512	18001.3	30.8846	6.26123	264.662	4.81071	6.30208	62.3509	15.583	6.33135	3140.6	65.8593	6.68357	12178.9	163.009	6.79195	10833.2	18.6839	6.91108	48844.2	687.791	7.03263	4931.48	53.236	7.18245	5.13762	7.23317	7.54902	51.5358	8.89028	8.20723	1297.3	3.90151	8.53317	254711	2207.96	8.78202	898.292	21.4735	9.11672	133.974	5.1479	9.23823	7.20898	1.97243	9.38868
CGA400_5	4.81367	886.215	15.0981	6.05185	4666.26	63.3291	6.25285	104.812	3.30226	6.34392	49.2052	15.4855	6.34807	1899.71	43.3257	6.7003	5358.81	74.9536	6.80868	12550.1	22.1309	6.91943	53143.4	747.922	7.03263	2465.94	28.4425	7.28285	3.11509	7.22314	7.56575	22.7548	8.71457	8.22397	2418.08	7.99185	8.54153	83407.9	724.117	8.78202	808.744	19.969	9.13345	140.378	5.18483	9.13783	13.2507	2.03227	9.41377
CGA400_6	4.91408	1724.57	26.3763	6.03512	9019.74	12.3251	6.26123	177.507	3.98825	6.33557	42.3013	15.4343	6.33972	904.824	25.2593	6.69195	1357.75	23.2952	6.80033	8954.39	14.9117	6.9111	53655.2	755.081	7.03265	521.392	8.88815	7.28287	18.3028	7.29845	7.56577	34.1518	8.78415	8.22398	2000.13	6.46654	8.54153	28936.3	252.279	8.7904	1026.25	23.6233	9.12508	297.895	6.09315	9.12947	23.0806	2.12964	9.39705
CGA400_7	4.93082	2041.67	30.6422	6.03513			6.26123	4384.44	43.6878	6.31883	28.0191	15.3285	6.33135	4100.16	83.2842	6.68358	952.331		6.79197	11131.5	19.2827	6.90273	83960.9	1178.96	7.03265	396.011	7.62732	7.25777	3.59758	7.22553	7.70802	20.3403	8.69983	8.20725	1839.67	5.88092	8.54992	58991.8	512.622	8.79877	644.585	17.211	9.13347	208.087	5.57527	9.11275	34.6102	2.24384	9.39705
CGA400_8	4.93082	2964.94	43.0628	6.03512	21515.9	38.1471	6.24448	547.822	7.4828	6.28533	78.9973	15.7064	6.33133	1498.59	36.0416	6.68357	1167.22	20.8353	6.78357	40793.7	78.8356	6.9027	13602.9	194.879	7.00753	742.395	11.1106	7.18243	4.86517	7.23182	7.68288	12.8281	8.65397	8.1905	1171.22	3.44139	8.5248	66186.1	574.94	8.77365	547.717	15.5836	9.11672	200.346	5.53063	9.2466	13.5274	2.03501	9.36358
[truncated: 14 more columns]

## Sheet: Table S10
Supplementary Table 10. The content of caffeoylquinic acids (CQAs) metabolites in serum among SAE1000 group, CGA400 group and CON group
Item	Neochlorogenic acid				Chlorogenic acid				Cryptochlorogenic acid				5-O-Feruloylquinic acid				Dihydrocaffeic acid				Vanillic acid				Caffeic Acid				3-hydroxybenzoic acid				Syringic acid				3-O-p-Coumaroylquinic acid				3-O-Feruloylquinic acid				p-Coumaric acid				3-(3-hydroxyl phenyl)propanol
	RT	Area	Calc. Conc.	Multiply by the dilution factor (4 times)	RT	Area	Calc. Conc.	Multiply by the dilution factor (4 times)	RT	Area	Calc. Conc.	Multiply by the dilution factor (4 times)	RT	Area	Calc. Conc.	Multiply by the dilution factor (4 times)	RT	Area	Calc. Conc.	Multiply by the dilution factor (4 times)	RT	Area	Calc. Conc.	Multiply by the dilution factor (4 times)	RT	Area	Calc. Conc.	Multiply by the dilution factor (4 times)	RT	Area	Calc. Conc.	Multiply by the dilution factor (4 times)	RT	Area	Calc. Conc.	Multiply by the dilution factor (4 times)	RT	Area	Calc. Conc.	Multiply by the dilution factor (4 times)	RT	Area	Calc. Conc.	Multiply by the dilution factor (4 times)	RT	Area	Calc. Conc.	Multiply by the dilution factor (4 times)	RT
2.5ppb	4.81172	148.174	13.1205		6.12467	2468.13	6.2344		6.37578	232.831	10.9289		6.38315	271.813	21.3756		6.32877	171.073	17.4014		6.74775	182.654	12.4574		6.86445	1212.46	8.98065		6.9919	202.348	12.8046		7.12177	246.707	12.1846		7.24643	485.984	13.9132		7.70485	352.195	16.0827		8.34607	792.94	9.13731		8.53803
5ppb	4.7448	234.11	14.245		6.03265	4671.96	10.8836		6.25867	442.25	12.9024		6.30788	268.349	21.351		6.31203	79.9455	15.7242		6.64738	211.096	12.7939		6.75572	1641.02	9.8565		6.86643	227.363	13.129		7.01303	290.411	12.5928		7.12097	508.171	14.0235		7.57938	405.56	16.4073		8.21223	1130.83	10.323		8.52967
10ppb	4.72807	364.342	15.949		6.02428	6447.4	14.629		6.25868	834.451	16.5983		6.29115	771.189	24.9083		6.2953	266.602	19.1595		6.64738	660.492	18.1109		6.75572	3747.09	14.1607		6.86645	553.835	17.3635		7.00468	744.607	16.8344		7.12097	1498.12	18.945		7.5794	1165.25	21.0285		8.35443	138.647	6.84141		8.52967
50ppb	4.73643	3069.31	51.343		6.02428	25273.6	54.3444		6.2503	4697.88	53.006		6.2995	4669.84	52.4884		6.2953	1802.56	47.4275		6.65575	3666.48	53.6762		6.75572	21651.6	50.7523		6.86643	2987.28	48.9261		6.9963	4339.75	50.4086		7.1126	8072.52	51.6291		7.57102	6699.26	54.6917		8.20387	12641.4	50.7131		8.5213
100ppb	4.73642	7022.77	103.073		6.02427	48853	104.087		6.25865	10167.3	104.548		6.30785	10912.3	96.6492		6.29528	4739.87	101.487		6.65572	7804.57	102.636		6.7557	48245	105.102		6.87478	7060.63	101.759		7.00465	10275.8	105.844		7.12093	18721.3	104.569		7.57937	15053.1	105.508		8.21222	29088.5	108.426		8.52965
500ppb	4.7364	33322.4	447.199		6.0159	204082	431.556		6.25028	45837.7	440.693		6.29948	54871.1	407.625		6.28692	22848	434.752		6.65572	36555.6	442.803		6.75568	221731	459.657		6.86642	34158.8	453.231		7.00465	46444.5	443.615		7.11257	84563.4	431.898		7.57937	64909.6	408.784		8.2122	131477	467.704		8.52963
800ppb	4.72805	59502.6	789.762		6.02427	407780	861.274		6.25865	83913.5	799.507		6.29948	108204	784.912		6.29527	42456.7	795.635		6.65572	65485.2	785.083		6.75568	386917	797.249		6.8664	59801.4	785.824		7.00465	83837.2	792.817		7.11257	157775	795.864		7.57937	129532	801.882		8.21222	224890	795.488		8.52965
1,000ppb	4.72803	78180	1034.15		6.02425	466189	984.492		6.25027	108300	1029.32		6.29947	146833	1058.19		6.2869	55512.2	1035.91		6.64735	87025.7	1039.94		6.75568	496763	1021.74		6.8664	78971.3	1034.46		6.99627	109578	1033.2		7.11257	206210	1036.66		7.571	169189	1043.12		8.20383	288550	1018.87		8.52127
CON_1	4.69458	180.809	13.5475	54.1902	6.01592	16339.1	35.4964	141.985	6.24192	103.202	9.70728	38.8291	6.38313	13.9376	19.5513	78.2051	6.3371	40.2457	14.9936	59.9743	6.65573	447.206	15.5874	62.3496	6.74732	6974.71	20.757	83.028	6.86643	3082.53	50.1615	200.646	6.9963	235.224	12.0774	48.3095	7.10423	113.085	12.0593	48.2373	7.58772	91.7586	14.4984	57.9937	8.20387	2416.13	14.833	59.3321	8.5213
CON_2	4.70297	232.239	14.2205	56.882	6.00755	16087.2	34.9649	139.86	6.26702	91.2708	9.59484	38.3794	6.37475	12.2422	19.5393	78.1571	6.3371	24.2103	14.6985	58.7939	6.65573	472.457	15.8862	63.5446	6.7557	6519.26	19.8262	79.3048	6.8748	3279.07	52.7107	210.843	7.00467	198.401	11.7335	46.934	7.12928	80.9338	11.8995	47.598	7.57938	32.0906	14.1355	56.5418	8.20387	2237.42	14.2059	56.8238	8.5213
CON_3	4.71132	145.396	13.0842	52.3367	6.00753	16120.9	35.0361	140.144	6.24193	81.2014	9.49995	37.9998	6.30785	12.6131	19.5419	78.1676	6.31202	42.3888	15.033	60.1321	6.64735	422.295	15.2927	61.1707	6.74733	6989.24	20.7867	83.1468	6.8664	2411.64	41.4599	165.84	6.99627	235.814	12.0829	48.3315	7.10422	56.6257	11.7787	47.1146	7.55428	23.8558	14.0854	56.3415	8.20387	2671.9	15.7305	62.9221	8.5129
CON_4	4.64442	155.722	13.2193	52.8772	6.00753	9722.12	21.5373	86.1492	6.24192	55.1721	9.25466	37.0186	6.24093	19.0229	19.5873	78.349	6.17818	56.5575	15.2938	61.1752	6.639	319.899	14.0812	56.3247	6.74733	4225.7	15.1388	60.5553	6.86642	3371.84	53.9139	215.656	7.00465	317.746	12.848	51.3921	7.1293	61.7413	11.8041	47.2164	7.55427	21.989	14.074	56.2961	8.19548	3165.23	17.4616	69.8465	8.5213
CON_5	4.6946	72.2552	12.1271	48.5086	6.00755	210.556	0	0	6.26702	26.9841	8.98903	35.9561	6.26603	16.6402	19.5704	78.2816	6.13637	77.9147	15.6869	62.7474	6.64737	488.31	16.0737	64.2949	6.77243	181.225	6.87309	27.4924	6.85805	1502.88	29.6729	118.692	6.98792	330.632	12.9684	51.8735	7.12932	55.9943	11.7755	47.1021	7.56265	48.4501	14.235	56.9399	8.20387	1913.65	13.0698	52.2794	8.52128
CON_6	4.72805	109.837	12.6189	50.4756	6.00753	13183.8	28.8401	115.36	6.2252	14.3852	8.8703	35.4812	6.32458	4.08693	19.4816	77.9264	6.3371	48.2103	15.1402	60.5607	6.65573	341.897	14.3414	57.3658	6.7557	6224.92	19.2246	76.8986	6.85805	1175.33	25.4245	101.698	7.00465	73.2717	10.5649	42.2598	7.11258	47.2091	11.7318	46.9274	7.571	24.0033	14.0863	56.3451	8.20385	2787.18	16.135	64.5401	8.52965
CON_7	4.68623	132.421	12.9144	51.6576	6.00755	10101.9	22.3386	89.3542	6.24193	68.7503	9.38262	37.5305	6.2995	17.2915	19.575	78.3	6.16147	69.5254	15.5325	62.1298	6.64737	446.216	15.5757	62.3028	6.74733	2397.05	11.4016	45.6064	6.86642	2694.4	45.1274	180.509	6.98793	325.043	12.9162	51.6647	7.0875	57.5844	11.7834	47.1337	7.53757	31.8345	14.1339	56.5356	8.1955	2221.38	14.1497	56.5987	8.51293
CON_8	4.68623	393.389	16.3291	65.3165	6.01592	13694.6	29.9175	119.67	6.24193	44.09	9.15023	36.6009	6.26605	23.6461	19.62	78.4798	6.31202	40.6187	15.0005	60.0018	6.65573	194.114	12.593	50.3718	6.7557	4288.95	15.2681	61.0724	6.86643	1806.51	33.6111	134.444	7.00467	48.4788	10.3334	41.3336	7.12932	24.7384	11.6201	46.4805	7.55428	52.7737	14.2613	57.0451	8.32933	53.5566	6.54283	26.1713	8.52132
SAE1000_1	4.70295	123.538	12.7982	51.1927	6.01588	12873.5	28.1853	112.741	6.27538	40.7535	9.11878	36.4751	6.30787	16.2064	19.5673	78.2693	6.32038	25.2676	14.7179	58.8717	6.65573	569.421	17.0334	68.1336	6.75568	7613.75	22.063	88.2521	6.87477	2008.1	36.2257	144.903	6.9963	1226.37	21.3334	85.3337	7.13768	78.3632	11.8867	47.5469	7.56265	48.6458	14.2362	56.9447	8.20385	3782.88	19.6289	78.5158	8.52128
SAE1000_2	4.6695	185.529	13.6093	54.4373	6.0159	11647.7	25.5995	102.398	6.24192	73.6615	9.4289	37.7156	6.24093	15.6277	19.5632	78.2529	6.37892	51.2698	15.1965	60.7859	6.64735	1144.85	23.8416	95.3662	6.75568	6100.75	18.9709	75.8835	6.86642	2075.12	37.0951	148.38	6.9879	1471.1	23.619	94.4759	7.07077	46.3425	11.7275	46.9101	7.57098	58.6756	14.2972	57.1887	8.20387	1952.23	15.2052	60.8209	8.52128
SAE1000_3	4.71968	94.3908	12.4168	49.6671	6.0159	13821.1	30.1845	120.738	6.24192	66.5916	9.36227	37.4491	6.28277	16.6099	19.5702	78.2807	6.29527	22.3302	14.6639	58.6555	6.64735	489.576	16.0887	64.3548	6.75568	13164.2	33.4065	133.626	6.87477	5554.07	82.2181	328.873	6.98792	827.377	17.6073	70.4294	7.1042	48.8059	11.7398	46.9591	7.56265	126.131	14.7075	58.83	8.20385	4297.31	21.4341	85.7362	8.51292
SAE1000_4	4.70295	327.894	15.4721	61.8885	6.00755	13012.3	28.4781	113.913	6.24193	96.4531	9.64368	38.5747	6.25767	17.245	19.5747	78.2987	6.32875	104.909	16.1837	64.7347	6.65572	505.746	16.28	65.1201	6.7557	7752.48	22.3465	89.3862	6.86642	2120.33	37.6814	150.726	6.99628	236.196	12.0865	48.3458	7.1042	62.7485	11.8091	47.2364	7.55427	59.913	14.3047	57.2188	8.20385	2287.61	14.3821	57.5283	8.51293
SAE1000_5	4.69458	193.801	13.7175	54.8702	6.0159	13027.5	28.5102	114.041	6.26702	59.2461	9.29305	37.1722	6.31622	15.036	19.559	78.2362	6.2451	32.6779	14.8543	59.4172	6.64737	767.074	19.3719	77.4877	6.7557	9133.57	25.1691	100.676	6.87478	2170.07	38.3266	153.306	6.9963	704.726	16.4619	65.8478	7.10422	85.8418	11.9239	47.6956	7.56265	126.992	14.7127	58.851	8.1955	5351.69	25.1338	100.535	8.51293
SAE1000_6	4.72807	133.901	12.9338	51.7351	6.00757	11901.2	26.1342	104.537	6.26702	55.5472	9.25819	37.0328	6.28277	29.2731	19.6598	78.6391	6.42073	30.8146	14.82	59.2801	6.65573	1316.58	25.8734	103.494	6.75568	7469.29	21.7678	87.0712	6.87477	2300.38	40.0167	160.067	6.99628	2629.88	34.4405	137.762	7.11258	108.309	12.0356	48.1424	7.57102	69.9397	14.3657	57.4628	8.20385	3478.81	18.562	74.2479	8.52128
SAE1000_7	4.62767	168.697	13.3891	53.5563	5.99917	10807.6	23.8271	95.3085	6.25867	49.5634	9.20181	36.8072	6.27442	39.8575	19.7346	78.9386	6.38727	32.3916	14.849	59.3961	6.65575	658.275	18.0847	72.3386	6.75572	10820.6	28.6169	114.468	6.8748	7083.8	102.059	408.237	6.99628	711.026	16.5208	66.0831	7.09585	42.2399	11.7071	46.8286	7.571	110.552	14.6127	58.451	8.19548	2731.53	15.9398	63.7592	8.51293
SAE1000_8	4.70298	406.876	16.5056	66.0224	6.00757	19074.4	41.2668	165.067	6.24195	131.962	9.9783	39.9132	6.29115	41.8799	19.7489	78.9958	6.2953	26.9107	14.7482	58.9927	6.63898	523.381	16.4887	65.9547	6.75572	11122.9	29.2348	116.939	6.8664	4771.86	72.0727	288.291	6.97955	239.403	12.1164	48.4656	7.10423	53.2579	11.7619	47.0477	7.56267	146.736	14.8328	59.3314	8.1955	2492.06	15.0995	60.3979	8.51292
CGA400_1	4.70297	86.9053	12.3188	49.2754	6.00757	8229.28	18.388	73.5521	6.24193	85.0355	9.53608	38.1443	6.29948	32.1442	19.6801	78.7203	6.35383	40.9419	15.0064	60.0256	6.65573	537.694	16.658	66.632	6.74733	2577.6	11.7706	47.0824	6.87478	1499.35	29.6271	118.509	6.97955	206.223	11.8065	47.2262	7.11258	79.1079	11.8904	47.5617	7.56265	563.727	17.3694	69.4776	8.19548	4857.86	23.401	93.604	8.50457
CGA400_2	4.6946	173.611	13.4534	53.8134	6.0159	11433.5	25.1476	100.59	6.24195	139.617	10.0504	40.2018	6.29113	26.9176	19.6431	78.5724	6.31202	27.4646	14.7584	59.0334	6.65573	710.068	18.6975	74.7898	6.75572	2641.81	11.9018	47.6073	6.87478	2518.37	42.8442	171.377	7.00467	218.103	11.9175	47.6699	7.09587	63.2256	11.8115	47.2459	7.56265	180.058	15.0355	60.1422	8.20387	2737.36	15.9602	63.841	8.52967
CGA400_3	4.71132	154.081	13.1978	52.7913	5.99082	15979.9	34.7386	138.954	6.25028	66.4069	9.36053	37.4421	6.3246	21.2563	19.6031	78.4122	6.38727	75.4129	15.6408	62.5632	6.64738	595.44	17.3412	69.365	6.76405	4470.12	15.6383	62.5534	6.86643	2314.16	40.1954	160.782	6.99632	638.155	15.8403	63.361	7.1126	118.673	12.0871	48.3485	7.56267	164.131	14.9387	59.7546	8.19552	3434.64	18.407	73.6279	8.52967
CGA400_4	4.66113	174.168	13.4607	53.8426	5.9908	349.445	0	0	6.2252	61.2533	9.31197	37.2479	6.25767	111.272	20.2398	80.9594	6.32037	61.7244	15.3889	61.5555	6.67245	539	16.6735	66.6938	6.73897	4904.44	16.526	66.1039	6.87477	5636.6	83.2886	333.154	7.00463	365.159	13.2908	53.1632	7.1293	78.4171	11.887	47.548	7.55427	1208.57	21.292	85.168	8.2122	3707.61	19.3648	77.4592	8.52965
CGA400_5	4.6695	152.722	13.18	52.7202	6.00755	10295.8	22.7475	90.9901	6.2503	39.7583	9.10941	36.4376	6.29948	20.4053	19.597	78.3881	6.18655	65.8183	15.4642	61.8569	6.639	643.577	17.9108	71.6431	6.74733	5589.42	17.9259	71.7035	6.85805	4057.7	62.8097	251.239	6.97118	375.59	13.3882	53.5529	7.11257	73.3663	11.8619	47.4475	7.56263	156.098	14.8898	59.5592	8.19548	4040.74	20.5338	82.1351	8.51292
CGA400_6	4.71968	610.376	19.1684	76.6734	6.0159	13107.6	28.6792	114.717	6.25028	260.962	11.194	44.7758	6.28275	38.7801	19.727	78.9081	6.27855	54.283	15.2519	61.0077	6.64737	419.814	15.2633	61.0533	6.75568	5745.85	18.2456	72.9823	6.8664	2521.93	42.8903	171.561	7.00465	209.586	11.8379	47.3518	7.12093	87.6942	11.9331	47.7324	7.56265	321.18	15.894	63.5759	8.18715	2206.54	14.0976	56.3903	8.538
CGA400_7	4.70297	464.961	17.2656	69.0625	6.01592	39532.4	84.4247	337.699	6.2503	134.826	10.0053	40.0211	6.26605	48.3619	19.7948	79.1792	6.3371	103.462	16.157	64.6281	6.65575	762.902	19.3226	77.2902	6.76408	7341.56	21.5067	86.027	6.86643	2892.24	47.6934	190.773	6.9963	727.107	16.671	66.6838	7.1126	75.7587	11.8738	47.4951	7.56263	308.082	15.8143	63.2573	8.20387	3767.12	19.5736	78.2945	8.5213
CGA400_8	4.6695	231.297	14.2082	56.8327	6.01592	18988.7	41.086	164.344	6.25867	64.4827	9.3424	37.3696	6.2995	21.8254	19.6071	78.4283	6.32875	131.834	16.6792	66.7168	6.65575	781.274	19.5399	78.1597	6.75572	6811.66	20.4238	81.6951	6.8748	1824.52	33.8447	135.379	6.99632	662.517	16.0678	64.271	7.12933	71.0491	11.8504	47.4014	7.56267	372.482	16.2061	64.8242	8.20388	3331.53	18.0452	72.1807	8.52967
[truncated: 35 more columns]

[truncated: 7 more sheets: Table S11, Table S12, Table S13, Table S14, Table S15, Table S16, Table S17]
